# Supplementary material for: DBU-Catalyzed transprotection of N-Fmoc-cysteine di- and tripeptides into S-Fm-cysteine di- and tripeptides
Source: Royal Society of Chemistry journal article supplement (doi:10.1039/c0ob00663g), 2010-11-11

# Electronic Supplementary Information

## DBU-Catalyzed Transprotection of *N*-Fmoc-Cysteine

### Di- and Tripeptides into *S*-Fm-Cysteine Di- and Tripeptides

Alan R. Katritzky,<sup>\*,a</sup> Nader E. Abo-Dya,<sup>a,b</sup> Abdelmotaal Abdelmajeid,<sup>a,c</sup>

Srinivasa R. Tala,<sup>a</sup> M. S. Amine,<sup>c</sup> and Said A. El-Feky<sup>b</sup>

<sup>a</sup>Center for Heterocyclic Compounds, University of Florida, Department of Chemistry, Gainesville,  
Florida 32611-7200, USA.

E-mail: [katritzky@chem.ufl.edu](mailto:katritzky@chem.ufl.edu)

<sup>b</sup>Department of Pharmaceutical Organic Chemistry, Faculty of Pharmacy, Zagazig University, Zagazig-  
44519, Egypt.

<sup>c</sup>Department of Chemistry, Faculty of Science, Benha University, Benha, Egypt.

#### Table of Contents

|                                                                                                             |     |
|-------------------------------------------------------------------------------------------------------------|-----|
| 1. Characterization data for compounds <b>3b-f</b> , <b>4b-f</b> , <b>9b-d</b> , <b>10a-c</b> and <b>11</b> | S3  |
| 2. References.....                                                                                          | S11 |
| 3. <sup>1</sup> H, <sup>13</sup> C NMR spectra .....                                                        | S12 |

***N*-Fmoc-L-Met-L-Cys-OH (3b)**<sup>[1]</sup> White microcrystals; yield: 88%; 97.0–99.0 °C.  $[\alpha]_{\text{D}}^{23}$  -37.0 (*c* 1.0 in MeOH). <sup>1</sup>H NMR (DMSO-*d*<sub>6</sub>)  $\delta$  8.22 (d, *J* = 7.5 Hz, 1H), 7.90 (d, *J* = 4.5 Hz, 2H), 7.74 (t, *J* = 5.7 Hz, 2H), 7.65 (d, *J* = 8.1 Hz, 1H), 7.43 (t, *J* = 7.2 Hz, 2H), 7.33 (t, *J* = 6.6 Hz, 2H), 4.44–4.42 (m, 1H), 4.35–4.18 (m, 4H), 2.90–2.79 (m, 2H), 2.47–2.42 (m, 1H), 2.05–1.95 (m, 3H), 1.92–1.85 (m, 2H), 1.24 (br s, 1H), 0.84 (m, 1H). <sup>13</sup>C NMR (DMSO-*d*<sub>6</sub>)  $\delta$  173.9, 171.6, 155.7, 143.8, 143.7, 140.6, 138.1, 129.2, 128.0, 127.6, 127.0, 126.2, 125.3, 125.2, 120.0, 65.6, 55.9, 50.3, 46.5, 37.4, 24.2, 22.8, 21.3. Anal. Calcd for C<sub>23</sub>H<sub>26</sub>N<sub>2</sub>O<sub>5</sub>S<sub>2</sub>: C, 58.21; H, 5.52; N, 5.90. Found: C, 58.48; H, 5.53; N, 5.64.

***N*-Fmoc-L-Ala-L-Cys-OH (3c)**. White microcrystals (84 %), mp 167.0–169.0 °C.  $[\alpha]_{\text{D}}^{23}$  -72.0 (*c* 1.0 in MeOH). <sup>1</sup>H NMR (DMSO-*d*<sub>6</sub>)  $\delta$  8.16 (d, *J* = 7.4 Hz, 1H), 7.89 (d, *J* = 7.3 Hz, 2H), 7.75–7.70 (m, 2H), 7.61 (d, *J* = 7.3 Hz, 1H), 7.42 (t, *J* = 7.1 Hz, 2H), 7.34 (d, *J* = 7.1 Hz, 2H), 4.44–4.40 (m, 1H), 4.25–4.20 (m, 3H), 4.14 (t, *J* = 6.7 Hz, 1H), 2.86–2.75 (m, 2H), 2.45–2.40 (m, 1H), 1.24 (d, *J* = 6.6 Hz, 3H), 1.09 (t, *J* = 6.9 Hz, 1H). <sup>13</sup>C NMR (DMSO-*d*<sub>6</sub>)  $\delta$  172.7, 171.8, 155.6, 143.9, 143.7, 140.7, 135.3, 129.5, 127.6, 127.1, 125.3, 123.9, 121.2, 120.1, 65.7, 51.5, 49.9, 46.6, 18.3. Anal. Calcd for C<sub>21</sub>H<sub>22</sub>N<sub>2</sub>O<sub>5</sub>S: C, 60.85; H, 5.35; N, 6.76. Found: C, 60.59; H, 5.44; N, 6.91.

***N*-Fmoc-L-Leu-L-Cys-OH (3d)**. White microcrystals (86 %), mp 68.0–70.0 °C.  $[\alpha]_{\text{D}}^{23}$  -23.0 (*c* 1.0 in MeOH). <sup>1</sup>H NMR (CDCl<sub>3</sub>)  $\delta$  7.74 (d, *J* = 7.1 Hz, 2H), 7.56 (d, *J* = 7.0 Hz, 2H), 7.38 (t, *J* = 7.3 Hz, 2H), 7.29 (t, *J* = 7.8 Hz, 2H), 5.75 (d, *J* = 8.5 Hz, 1H), 4.82 (s, 1H), 4.36 (d, *J* = 5.4 Hz, 2H), 4.20 (d, *J* = 6.6 Hz, 1H), 3.49 (q, *J* = 7.0 Hz, 1H), 3.10–2.95 (m, 1H), 1.64–1.55 (m, 2H), 1.51 (t, *J* = 9.1 Hz, 1H), 1.21 (t, *J* = 7.0 Hz, 1H), 1.00–0.85 (m, 6H). <sup>13</sup>C NMR (CDCl<sub>3</sub>)  $\delta$  172.6, 156.7, 143.7, 141.5, 128.0, 127.3, 125.2, 120.2, 67.6, 54.1, 53.7, 47.3, 41.4, 26.5, 24.9, 23.0, 22.3. Anal. Calcd for C<sub>24</sub>H<sub>28</sub>N<sub>2</sub>O<sub>5</sub>S: C, 63.14; H, 6.18; N, 6.14. Found: C, 63.59; H, 6.48; N, 5.32.

***N*-Fmoc-L-Gly-L-Cys-OH (3e)**<sup>II</sup>. White microcrystals; yield: 84%; 90.0–91.0 °C.  $[\alpha]_D^{23}$  -60.0 (*c* 1.0 in MeOH). <sup>1</sup>H NMR (DMSO-*d*<sub>6</sub>)  $\delta$  8.18 (d, *J* = 7.5 Hz, 1H) 7.89 (d, *J* = 7.5 Hz, 2H), 7.72 (d, *J* = 7.5 Hz, 2H), 7.61–7.57 (m, 1H), 7.42 (t, *J* = 7.5 Hz, 2H), 7.33 (t, *J* = 7.5 Hz, 2H), 4.50–4.42 (m, 1H), 4.30–4.24 (m, 3H), 3.74–3.70 (m, 2H), 2.88–2.79 (m, 2H), 2.42 (t, *J* = 8.7 Hz, 1H). <sup>13</sup>C NMR (DMSO-*d*<sub>6</sub>)  $\delta$  171.4, 169.1, 156.5, 144.0, 140.7, 127.6, 127.0, 125.2, 120.1, 65.8, 54.2, 46.6, 43.2, 25.7. Anal. Calcd for C<sub>20</sub>H<sub>20</sub>N<sub>2</sub>O<sub>5</sub>S: C, 59.99; H, 5.03; N, 7.00. Found: C, 59.65; H, 4.94; N, 7.01.

***N*-Fmoc-L-Lys(N-Boc)-L-Cys-OH (3f)**. White microcrystals (78 %), mp 88.0–90.0 °C.  $[\alpha]_D^{23}$  +8.0 (*c* 1.0 in MeOH). <sup>1</sup>H NMR (CDCl<sub>3</sub>)  $\delta$  7.75 (d, *J* = 7.4 Hz, 2H), 7.65–7.52 (m, 2H), 7.38 (t, *J* = 7.0 Hz, 2H), 7.34–7.24 (m, 4H), 5.95 (br s, 1H), 4.85–4.78 (m, 1H), 4.45–4.25 (m, 3H), 4.20 (d, *J* = 5.6 Hz, 1H), 3.75 (s, 1H), 3.20–2.95 (m, 4H), 1.45–1.25 (m, 15H). <sup>13</sup>C NMR (CDCl<sub>3</sub>)  $\delta$  172.6, 156.7, 144.0, 143.8, 141.4, 127.9, 127.2, 125.3, 120.1, 79.8, 67.4, 55.0, 54.2, 47.2, 40.3, 34.8, 32.3, 31.8, 29.7, 29.2, 28.6, 26.6, 25.5, 22.8, 20.9, 14.3, 11.6. Anal. Calcd for C<sub>29</sub>H<sub>37</sub>N<sub>3</sub>O<sub>7</sub>S: C, 60.93; H, 6.52; N, 7.35. Found: C, 60.64; H, 6.73; N, 7.49.

***N*-Fmoc-Gly-L-Leu-L-Cys-OH (7a)**<sup>II</sup> White microcrystals; yield: 88%; 170.0–172.0 °C. <sup>1</sup>H NMR (DMSO-*d*<sub>6</sub>)  $\delta$  8.26 (d, *J* = 7.8 Hz, 1H), 8.15 (d, *J* = 8.1 Hz, 1H), 7.90 (d, *J* = 7.5 Hz, 2H), 7.73 (d, *J* = 7.2 Hz, 2H), 7.57 (t, *J* = 5.7 Hz, 1H), 7.43 (t, *J* = 7.2 Hz, 2H), 7.34 (t, *J* = 7.2 Hz, 2H), 4.49–4.37 (m, 2H), 4.32–4.15 (m, 3H), 3.66 (d, *J* = 5.4 Hz, 2H), 2.92–2.72 (m, 2H), 2.48–2.46 (m, 1H), 1.70–1.63 (m, 1H), 1.63–1.31 (m, 2H), 0.89–0.85 (m, 6H). <sup>13</sup>C NMR (DMSO-*d*<sub>6</sub>)  $\delta$  172.1, 171.4, 168.8, 156.5, 143.8, 140.7, 127.6, 127.1, 125.2, 120.1, 65.7, 54.4, 50.8, 46.6, 43.3, 41.0, 25.3, 24.0, 23.0, 21.7. Anal. Calcd for C<sub>26</sub>H<sub>31</sub>N<sub>3</sub>O<sub>6</sub>S: C, 60.80; H, 6.08; N, 8.18. Found: C, 60.56; H, 6.21; N, 8.20.

**N-Fmoc-Phe-L-Ala-L-Cys-OH (7b).** White microcrystals 96%, mp 196.0–198.3 °C.  $[\alpha]_D^{23}$  -61.0 (*c* 1.0 in MeOH).  $^1\text{H}$  NMR (DMSO- $d_6$ )  $\delta$  8.28 (d, *J* = 7.3 Hz, 1H), 8.16 (d, *J* = 7.8 Hz, 1H), 7.88 (d, *J* = 7.4 Hz, 2H), 7.70–7.56 (m, 3H), 7.45–7.15 (m, 10H), 4.50–4.35 (m, 2H), 4.32–4.25 (m, 1H), 4.14 (s, 3H), 3.10–3.00 (m, 1H), 2.90–2.70 (m, 3H), 2.44 (d, *J* = 7.8 Hz, 1H), 1.26 (d, *J* = 6.9 Hz, 3H).  $^{13}\text{C}$  NMR (DMSO- $d_6$ )  $\delta$  172.2, 171.4, 155.8, 143.7, 140.6, 138.2, 129.2, 128.0, 127.6, 127.0, 126., 2125.2, 120.0, 65.6, 56.0, 54.2, 48.2, 46.5, 37.4, 25.6, 18.1. Anal. Calcd for C<sub>30</sub>H<sub>31</sub>N<sub>3</sub>O<sub>6</sub>S: C, 64.15; H, 5.56; N, 7.48. Found: C, 63.86; H, 5.69; N, 7.53.

**H-L-Met-L-Cys(S-Fm)-OH (4b).** White microcrystals 76 %, mp 205.0–207.0 °C.  $[\alpha]_D^{23}$  -8.0 (*c* 1.0 in MeOH).  $^1\text{H}$  NMR (DMSO- $d_6$ )  $\delta$  8.37 (br s, 1H), 7.85 (d, *J* = 7.5 Hz, 2H), 7.76–7.72 (m, 2H), 7.40–7.28 (m, 4H), 4.29 (br s, 3H), 4.18–4.10 (m, 1H), 3.56 (t, *J* = 6.3 Hz, 2H), 3.16–2.87 (m, 4H), 2.56–2.53 (m, 1H), 2.01 (br s, 3H), 1.90 (t, *J* = 6.3 Hz, 1H), 1.80–1.73 (m, 1H).  $^{13}\text{C}$  NMR (DMSO- $d_6$ )  $\delta$  172.6, 169.8, 146.3, 140.7, 127.7, 127.3, 125.3, 120.2, 54.1, 52.7, 46.7, 38.0, 36.1, 35.3, 32.4, 28.9, 14.8. Anal. Calcd for C<sub>22</sub>H<sub>26</sub>N<sub>2</sub>O<sub>3</sub>S $\cdot$ 2H<sub>2</sub>O: C, 58.90; H, 6.29; N, 6.24. Found: C, 58.63; H, 6.12; N, 5.96

**H-L-Ala-L-Cys(S-Fm)-OH (4c).** White microcrystals 70 %, mp 202.0–204.0 °C.  $[\alpha]_D^{23}$  -104.0 (*c* 1.0 in MeOH).  $^1\text{H}$  NMR (D<sub>2</sub>O, D<sub>2</sub>SO<sub>4</sub>)  $\delta$  6.88 (br s, 2H), 6.78 (br s, 2H), 6.68–6.58 (m, 4H), 3.95–3.86 (m, 1H), 3.75–3.65 (m, 1H), 3.19–3.15 (m, 1H), 2.30–2.00 (m, 4H), 1.20–1.10 (m, 3H).  $^{13}\text{C}$  NMR (D<sub>2</sub>O, D<sub>2</sub>SO<sub>4</sub>)  $\delta$  172.9, 170.7, 145.5, 140.5, 127.3, 127.0, 124.7, 119.6, 52.6, 49.0, 46.1, 35.4, 32.8, 16.6. Anal. Calcd for C<sub>20</sub>H<sub>22</sub>N<sub>2</sub>O<sub>3</sub>S: C, 64.84; H, 5.99; N, 7.56. Found: C, 64.86; H, 6.07; N, 7.47.

**H-L-Leu-L-Cys(S-Fm)-OH (4d).** White microcrystals 87 %, mp 207.0–209.0 °C.  $[\alpha]_D^{23}$  -32.0 (*c* 1.0 in MeOH).  $^1\text{H}$  NMR (DMSO- $d_6$ )  $\delta$  8.32–8.30 (m, 1H), 7.90–7.70 (m, 4H), 7.50–7.25 (m, 4H), 4.34–4.25 (m, 2H), 4.17–4.10 (m, 2H), 3.62–3.58 (m, 1H),

3.12–3.08 (m, 1H), 3.02 (dd,  $J = 12.7, 6.0$  Hz, 1H), 2.95–2.80 (m, 1H), 1.69–1.65 (m, 1H), 1.55–1.50 (m, 1H), 1.45–1.35 (m, 1H), 0.95–0.82 (m, 6H).  $^{13}\text{C}$  NMR (DMSO- $d_6$ )  $\delta$  172.1, 170.7, 146.0, 140.4, 139.4, 128.9, 127.3, 126.9, 125.0, 121.4, 120.0, 109.7, 53.6, 51.7, 46.4, 41.5, 35.9, 34.9, 23.7, 22.9, 21.9. Anal. Calcd for  $\text{C}_{23}\text{H}_{28}\text{N}_2\text{O}_3\text{S}\cdot\text{H}_2\text{O}$ : C, 64.16; H, 7.02; N, 6.51. Found: C, 64.14; H, 7.05; N, 6.24.

**H-Gly-Cys-(S-Fm)-OH (4e)** White microcrystals 78 %, mp 230.0–232.0 °C.  $[\alpha]_{\text{D}}^{23} -10.0$  ( $c$  1.0 in MeOH).  $^1\text{H}$  NMR (DMSO- $d_6$ )  $\delta$  8.38 (m,  $J = 5.7$  Hz, 1H), 7.84–7.73 (m, 4H), 7.39–7.27 (m, 4H), 4.30–4.00 (br s, 3H), 4.24 (br s, 1H), 4.12 (m, 1H), 3.54 (d,  $J = 15$  Hz, 1H), 3.41 (d,  $J = 14.9$  Hz, 1H), 3.15–3.00 (m, 2H), 2.95–2.80 (m, 2H).  $^{13}\text{C}$  NMR (DMSO- $d_6$ )  $\delta$  172.5, 166.8, 146.0, 140.3, 128.8, 127.2, 126.8, 124.9, 121.2, 119.9, 119.7, 53.9, 46.2, 40.9, 35.7, 35.2. Anal. Calcd for  $\text{C}_{19}\text{H}_{20}\text{N}_2\text{O}_3\text{S}\cdot 2\text{H}_2\text{O}$ : C, 58.15; H, 6.16; N, 7.14. Found: C, 58.00; H, 5.67; N, 6.97.

**H-L-Lys(N-Boc)-L-Cys(S-Fm)-OH (4f)**. White microcrystals (69 %), mp 165.0–167.0 °C.  $[\alpha]_{\text{D}}^{23} +96.0$  ( $c$  1.0 in MeOH).  $^1\text{H}$  NMR (DMSO- $d_6$ )  $\delta$  8.40 (br s, 1H), 7.85–7.70 (m, 4H), 7.50–7.30 (m, 4H), 6.77 (s, 1H), 5.50–4.50 (m, 2H), 4.25–4.12 (m, 2H), 3.55–3.50 (m, 1H), 3.20–2.80 (m, 5H), 1.80–1.20 (m, 16H).  $^{13}\text{C}$  NMR (DMSO- $d_6$ )  $\delta$  171.6, 168.9, 155.7, 146.0, 140.8, 127.7, 127.3, 125.2, 121.7, 120.3, 77.8, 52.2, 46.7, 36.1, 33.9, 31.0, 29.4, 28.6, 21.5. Anal. Calcd for  $\text{C}_{28}\text{H}_{37}\text{N}_3\text{O}_5\text{S}\cdot\text{H}_2\text{O}$ : C, 61.63; H, 6.83; N, 7.70. Found: C, 61.59; H, 7.12; N, 7.37.

**H-Gly-L-Leu-L-Cys(S-Fm)-OH (8a)** White microcrystals 80 %, mp 200.0–202.0 °C.  $[\alpha]_{\text{D}}^{23} -34.0$  ( $c$  1.0 in MeOH).  $^1\text{H}$  NMR (DMSO- $d_6$ )  $\delta$  8.74 (d,  $J = 7.2$  Hz, 1H), 7.95 (d,  $J = 6.0$  Hz, 1H), 7.84 (d,  $J = 7.5$  Hz, 2H), 7.36 (dd,  $J = 7.2, 3.6$  Hz, 2H), 7.37 (t,  $J = 7.2$  Hz, 2H), 7.29 (t,  $J = 7.2$  Hz, 2H), 4.31–4.25 (m, 1H), 4.12–4.09 (m, 2H), 3.54 (q,  $J = 16.5$  Hz, 2H), 3.13–2.86 (m, 4H), 1.62–1.55 (m, 1H), 1.50–1.46 (m, 2H), 0.84 (t,  $J = 6.9$  Hz, 6H),  $^{13}\text{C}$  NMR (DMSO- $d_6$ )  $\delta$  172.3, 171.2, 167.5, 146.1, 140.3,

127.3, 126.9, 125.0, 124.9, 119.8, 53.5, 51.8, 46.5, 41.0, 36.0, 34.7, 24.2, 23.1, 21.4.

Anal. Calcd for  $C_{25}H_{31}N_3O_4S \cdot 3H_2O$ : C, 57.34; H, 7.12; N, 8.02. Found: C, 56.89; H, 6.68; N, 7.82.

**H-Phe-L-Ala-L-Cys(S-Fm)-OH (8b)**. White microcrystals 78 %, mp 218.0–220.0 °C.  $[\alpha]_D^{23}$  -12.8 (*c* 1.0 in MeOH).  $^1H$  NMR (DMSO- $d_6$ )  $\delta$  8.20 (d, *J* = 6.3 Hz, 1H), 7.95–7.80 (m, 4H), 7.73 (t, *J* = 7.2 Hz, 1H), 7.45–7.32 (m, 4H), 7.30–7.20 (m, 5H), 6.30–6.25 (m, 1H), 4.40–4.28 (m, 2H), 4.20–4.10 (m, 1H), 3.12–2.98 (m, 4H), 2.88–2.76 (m, 2H), 2.75–2.70 (m, 1H), 1.30–1.20 (m, 3H).  $^{13}C$  NMR (DMSO- $d_6$ )  $\delta$  171.8, 167.5, 145.9, 140.6, 134.9, 129.6, 128.6, 127.4, 127.1, 125.0, 121.5, 120.0, 53.2, 52.3, 48.2, 46.5, 37.0, 35.8, 33.9, 18.7. Anal. Calcd for  $C_{29}H_{31}N_3O_4S \cdot H_2O$ : C, 65.02; H, 6.21; N, 7.84. Found: C, 65.58; H, 6.27; N, 7.53.

**Cbz-Ala-L-Gly-L-Cys(S-Fm)-OH (9b)** White microcrystals 70 %, mp 155.0–157.0 °C.  $[\alpha]_D^{23}$  -19.0 (*c* 1.0 in MeOH).  $^1H$  NMR (DMSO- $d_6$ )  $\delta$  12.88 (br s, 1H), 8.21–8.13 (m, 2H), 7.86 (d, *J* = 7.5 Hz, 2H), 7.72 (t, *J* = 7.8 Hz, 2H), 7.52 (d, *J* = 6.3 Hz, 1H), 7.41–7.29 (m, 9H), 5.04 (dd, *J* = 18.0, 12.0 Hz, 2H), 4.49–4.45 (m, 1H), 4.16 (t, *J* = 6.0 Hz, 1H), 4.07 (t, *J* = 6.6 Hz, 1H), 3.76 (d, *J* = 6.0 Hz, 2H), 2.94 (dd, *J* = 13.8, 4.8 Hz, 1H), 2.79 (dd, *J* = 13.8, 7.8 Hz, 1H), 1.22 (m, 3H).  $^{13}C$  NMR (DMSO- $d_6$ )  $\delta$  172.6, 171.7, 168.6, 155.6, 145.7, 140.4, 136.8, 128.2, 127.6, 127.2, 126.8, 124.8, 119.8, 65.3, 61.2, 52.0, 50.0, 46.2, 41.6, 35.6, 33.8, 17.9. Anal. Calcd for  $C_{30}H_{31}N_3O_6S$ : C, 64.15; H, 5.56; N, 7.48. Found: C, 63.72; H, 5.95; N, 7.18.

**Cbz-Gly-L-Ala-L-Cys(S-Fm)-OH (9c)**. White microcrystals 60 %, mp 168.0–170.0 °C.  $[\alpha]_D^{23}$  +21.0 (*c* 1.0 in MeOH).  $^1H$  NMR (DMSO- $d_6$ )  $\delta$  13.00 (s, 1H), 8.34 (d, *J* = 7.5 Hz, 1H), 8.03 (d, *J* = 7.6 Hz, 1H), 7.85 (d, *J* = 7.0 Hz, 2H), 7.73 (t, *J* = 6.4 Hz, 2H), 7.50–7.44 (m, 1H), 7.42–7.25 (m, 9H), 5.03 (s, 2H), 4.45–4.35 (m, 2H), 4.20–4.10 (m, 1H), 3.70–3.60 (m, 1H), 3.45 (br s, 1H), 3.22–3.15 (m, 2H), 2.95 (dd, *J* = 12.0, 9.0

Hz, 1H), 2.85–2.80 (m, 1H), 1.38 (d,  $J = 6.4$  Hz, 1H), 1.22 (d,  $J = 6.4$  Hz, 2H).  $^{13}\text{C}$  NMR (DMSO- $d_6$ )  $\delta$  172.2, 171.8, 168.5, 156.4, 145.8, 140.5, 137.0, 128.3, 127.6, 127.3, 126.9, 124.9, 119.9, 65.4, 52.3, 47.8, 46.4, 43.4, 35.7, 33.7, 18.6. Anal. Calcd for  $\text{C}_{30}\text{H}_{31}\text{N}_3\text{O}_6\text{S}\cdot\text{H}_2\text{O}$ : C, 62.16; H, 5.74; N, 7.25. Found: C, 62.38; H, 5.45; N, 7.86.

**Cbz-L-Leu-L-Met-L-Cys-OH (9d)**. White microcrystals 65 %, mp 131.0–133.0 °C.  $[\alpha]_{\text{D}}^{23}$  -18.0 ( $c$  1.0 in MeOH).  $^1\text{H}$  NMR (DMSO- $d_6$ )  $\delta$  8.25 (d,  $J = 7.8$  Hz, 1H), 8.02 (d,  $J = 7.8$  Hz, 1H), 7.85 (d,  $J = 7.2$  Hz, 2H), 7.72 (d,  $J = 7.5$  Hz, 2H), 7.48 (d,  $J = 8.4$  Hz, 1H), 7.41–7.28 (m, 9H), 5.02 (s, 2H), 4.44–4.42 (m, 2H), 4.15 (t,  $J = 5.7$  Hz, 1H), 4.10–4.00 (m, 1H), 3.15 (d,  $J = 6$  Hz, 2H), 2.94 (dd,  $J = 12.0, 9.0$  Hz, 1H), 2.80 (dd,  $J = 12.0, 6.9$  Hz, 1H), 2.45 (br s, 2H), 2.02 (m, 3H), 1.99–1.87 (m, 1H), 1.84–1.79 (m, 1H), 1.65–1.57 (m, 1H), 1.47–1.40 (m, 2H), 1.26 (d,  $J = 6.0$  Hz, 1H), 0.84 (m,  $J = 4.2$  Hz, 6H).  $^{13}\text{C}$  NMR (DMSO- $d_6$ )  $\delta$  172.2, 171.8, 171.0, 155.9, 145.8, 140.5, 137.0, 128.3, 127.6, 127.4, 126.9, 124.9, 119.9, 65.3, 53.1, 52.2, 51.6, 46.4, 35.6, 33.7, 32.3, 29.3, 24.2, 23.0, 21.4, 14.7. Anal. Calcd for  $\text{C}_{36}\text{H}_{43}\text{N}_3\text{O}_6\text{S}_2$ : C, 63.79; H, 6.39; N, 6.20. Found: C, 63.55; H, 6.57; N, 6.19.

**Cbz-L-Leu-Met-Gly-Cys(S-Fm)-OH (10a)**. White microcrystals 75 %, mp 80.0–82.0 °C.  $[\alpha]_{\text{D}}^{23}$  -70.0 ( $c$  1.0 in MeOH).  $^1\text{H}$  NMR (DMSO- $d_6$ )  $\delta$  12.85 (br s, 1H), 8.25 (t,  $J = 6.1$  Hz, 1H), 8.13 (t,  $J = 3.0$  Hz, 1H), 7.90–7.81 (m, 2H), 7.72 (t,  $J = 7.2$  Hz, 2H), 7.42–7.25 (m, 11 H), 5.01 (s, 2H), 4.52–4.45 (m, 1H), 4.40–4.30 (m, 1H), 4.28–4.24 (m, 1H), 4.20–4.10 (m, 1H), 4.12–4.00 (m, 1H), 3.85–3.60 (m, 1H), 3.14 (d,  $J = 6.4$  Hz, 2H), 2.92 (dd,  $J = 15.0, 9.0$  Hz, 1H), 2.88–2.75 (m, 1H), 1.65–1.55 (m, 1H), 1.53–1.40 (m, 2H), 1.30–1.20 (m, 4H), 0.90–0.80 (m, 9H).  $^{13}\text{C}$  NMR (DMSO- $d_6$ )  $\delta$  172.4, 171.9, 171.2, 168.6, 155.9, 145.8, 143.8, 140.5, 137.0, 128.3, 127.6, 127.4, 126.9, 125.2, 124.9, 119.9, 65.4, 62.8, 53.1, 52.2, 51.8, 46.4, 41.7, 35.7, 33.9, 32.1, 31.0, 29.4,

24.2, 23.1, 22.1, 21.4, 14.6, 14.0. Anal. Calcd for C<sub>38</sub>H<sub>46</sub>N<sub>4</sub>O<sub>7</sub>S<sub>2</sub>: C, 62.10; H, 6.31.  
Found: C, 62.39; H, 6.68.

**Cbz-L-Ala-Phe-Ala-Cys(S-Fm)-OH (10b)**. White microcrystals 72%, mp 149.0–151.0 °C.  $[\alpha]_D^{23}$  -103.0 (*c* 1.0 in MeOH). <sup>1</sup>H NMR (DMSO-*d*<sub>6</sub>) δ 8.83 (d, *J* = 8.2 Hz, 1H), 8.30–8.20 (m, 2H), 8.13 (d, *J* = 7.7 Hz, 1H), 7.86 (t, *J* = 7.2 Hz, 3H), 7.75–7.70 (m, 2H), 7.45–7.28 (m, 10 H), 7.23–6.90 (m, 3H), 5.00 (s, 1H), 4.50–4.35 (m, 2H), 4.20–4.15 (m, 1H), 3.99 (t, *J* = 6.9 Hz, 1H), 3.70–3.45 (m, 2H), 3.18 (t, *J* = 7.2 Hz, 2H), 3.05–2.92 (m, 2H), 2.90–2.80 (m, 2H), 1.37 (d, *J* = 7.0 Hz, 1H), 1.23 (d, *J* = 7.0 Hz, 2H), 1.11 (d, *J* = 6.7 Hz, 2H), 0.96 (d, *J* = 6.6 Hz, 1H). <sup>13</sup>C NMR (DMSO-*d*<sub>6</sub>) δ 172.0, 171.7, 171.3, 170.3, 169.6, 155.4, 145.7, 140.4, 137.6, 136.8, 129.2, 128.2, 127.8, 127.6, 127.3, 126.8, 126.0, 124.8, 119.8, 65.3, 53.4, 52.5, 52.2, 50.2, 47.9, 46.3, 37.3, 35.6, 33.8, 18.3, 17.1. Anal. Calcd for C<sub>40</sub>H<sub>42</sub>N<sub>4</sub>O<sub>7</sub>S·2H<sub>2</sub>O: C, 63.31; H, 6.11; N, 7.38. Found: C, 62.91; H, 5.88; N, 7.31.

**Cbz-L-Ala-Phe-Leu-Cys(S-Fm)-OH (10c)**. White microcrystals 79 %, mp 129.0–131.0 °C.  $[\alpha]_D^{23}$  -118.0 (*c* 1.0 in MeOH). <sup>1</sup>H NMR (DMSO-*d*<sub>6</sub>) δ 8.30–8.18 (m, 1H), 7.95–7.90 (m, 1H), 7.85–7.80 (m, 1H), 7.70–7.60 (m, 1H), 7.50–7.15 (m, 16H), 7.10–6.95 (m, 1H), 6.64–6.55 (m, 1H), 5.00 (s, 2H), 4.40 (br s, 1H), 4.30–4.10 (m, 1H), 4.08–3.90 (m, 1H), 3.64 (br s, 2H), 3.40–3.30 (m, 2H), 3.28–3.10 (m, 1H), 3.05–2.90 (m, 2H), 2.75–2.65 (m, 2H), 1.47 (br s, 2H), 1.30–1.10 (m, 3H), 0.84 (s, 5H). <sup>13</sup>C NMR (DMSO-*d*<sub>6</sub>) δ 173.2, 172.7, 171.7, 169.2, 155.6, 148.3, 147.8, 145.8, 141.0, 140.5, 139.7, 137.4, 137.0, 136.5, 131.0, 129.2, 129.0, 128.3, 127.9, 127.7, 127.3, 126.7, 126.4, 125.3, 124.7, 120.3, 120.0, 119.4, 113.9, 65.4, 55.4, 53.5, 49.9, 43.9, 42.8, 36.7, 36.5, 34.9, 23.4, 23.1, 22.8, 21.9, 18.1. Anal. Calcd for C<sub>43</sub>H<sub>48</sub>N<sub>4</sub>O<sub>7</sub>S: C, 67.52; H, 6.32. Found: C, 67.38; H, 6.05.



**Fmoc-Gly-L-Leu-Gly-L-Leu-Cys(S-Fm)-OH (11)** White microcrystals 69 %, mp 115.0–117.0 °C.  $[\alpha]_D^{23}$  -23.0 (*c* 1.0 in MeOH).  $^1\text{H}$  NMR (DMSO-*d*<sub>6</sub>)  $\delta$  8.27 (d, *J* = 7.5 Hz, 1H), 8.18– 8.14 (m, 1H), 7.96 (t, *J* = 7.8 Hz, 1H), 7.85–7.78 (m, 5H), 7.67 (t, *J* = 6.9 Hz, 4H), 7.45 (t, *J* = 6 Hz, 1H), 7.38–7.23 (m, 8H), 4.37–4.31 (m, 2H), 4.27–4.18 (m, 4H), 4.11 (t, *J* = 6.6 Hz, 1H), 3.65 (d, *J* = 5.7 Hz, 2H), 3.60 (d, *J* = 6.0 Hz, 2H), 3.10 (d, *J* = 5.7 Hz, 2H), 2.88 (dd, *J* = 13.8, 5.4 Hz, 1H), 2.74 (dd, *J* = 13.8, 8.1 Hz, 1H), 1.56–1.45 (m, 2H), 1.42–1.39 (m, 4H), 1.19 (br s, 1H), 0.81–0.79 (m, 13 H).  $^{13}\text{C}$  NMR (DMSO-*d*<sub>6</sub>)  $\delta$  172.2, 172.0, 171.8, 168.9, 168.3, 156.4, 145.8, 143.8, 140.7, 140.5, 127.6, 127.3, 127.0, 126.9, 125.2, 124.9, 120.1, 119.9, 65.7, 52.3, 51.0, 50.6, 46.6, 46.4, 35.7, 33.6, 24.1, 23.11, 21.58. Anal. Calcd for C<sub>48</sub>H<sub>55</sub>N<sub>5</sub>O<sub>8</sub>S.H<sub>2</sub>O: C, 65.51; H, 6.53; N, 7.96. Found: C, 65.43; H, 6.89; N, 7.68.

## References

1. Katritzky, A. R.; Abo-Dya, Nader E.; Srinivasa R. Tala and Abdel-Samii, Zakaria K. *Org. Biomol. Chem.* **2010**, *8*, 2316-2319.

# <sup>1</sup>H, <sup>13</sup>C NMR Spectra

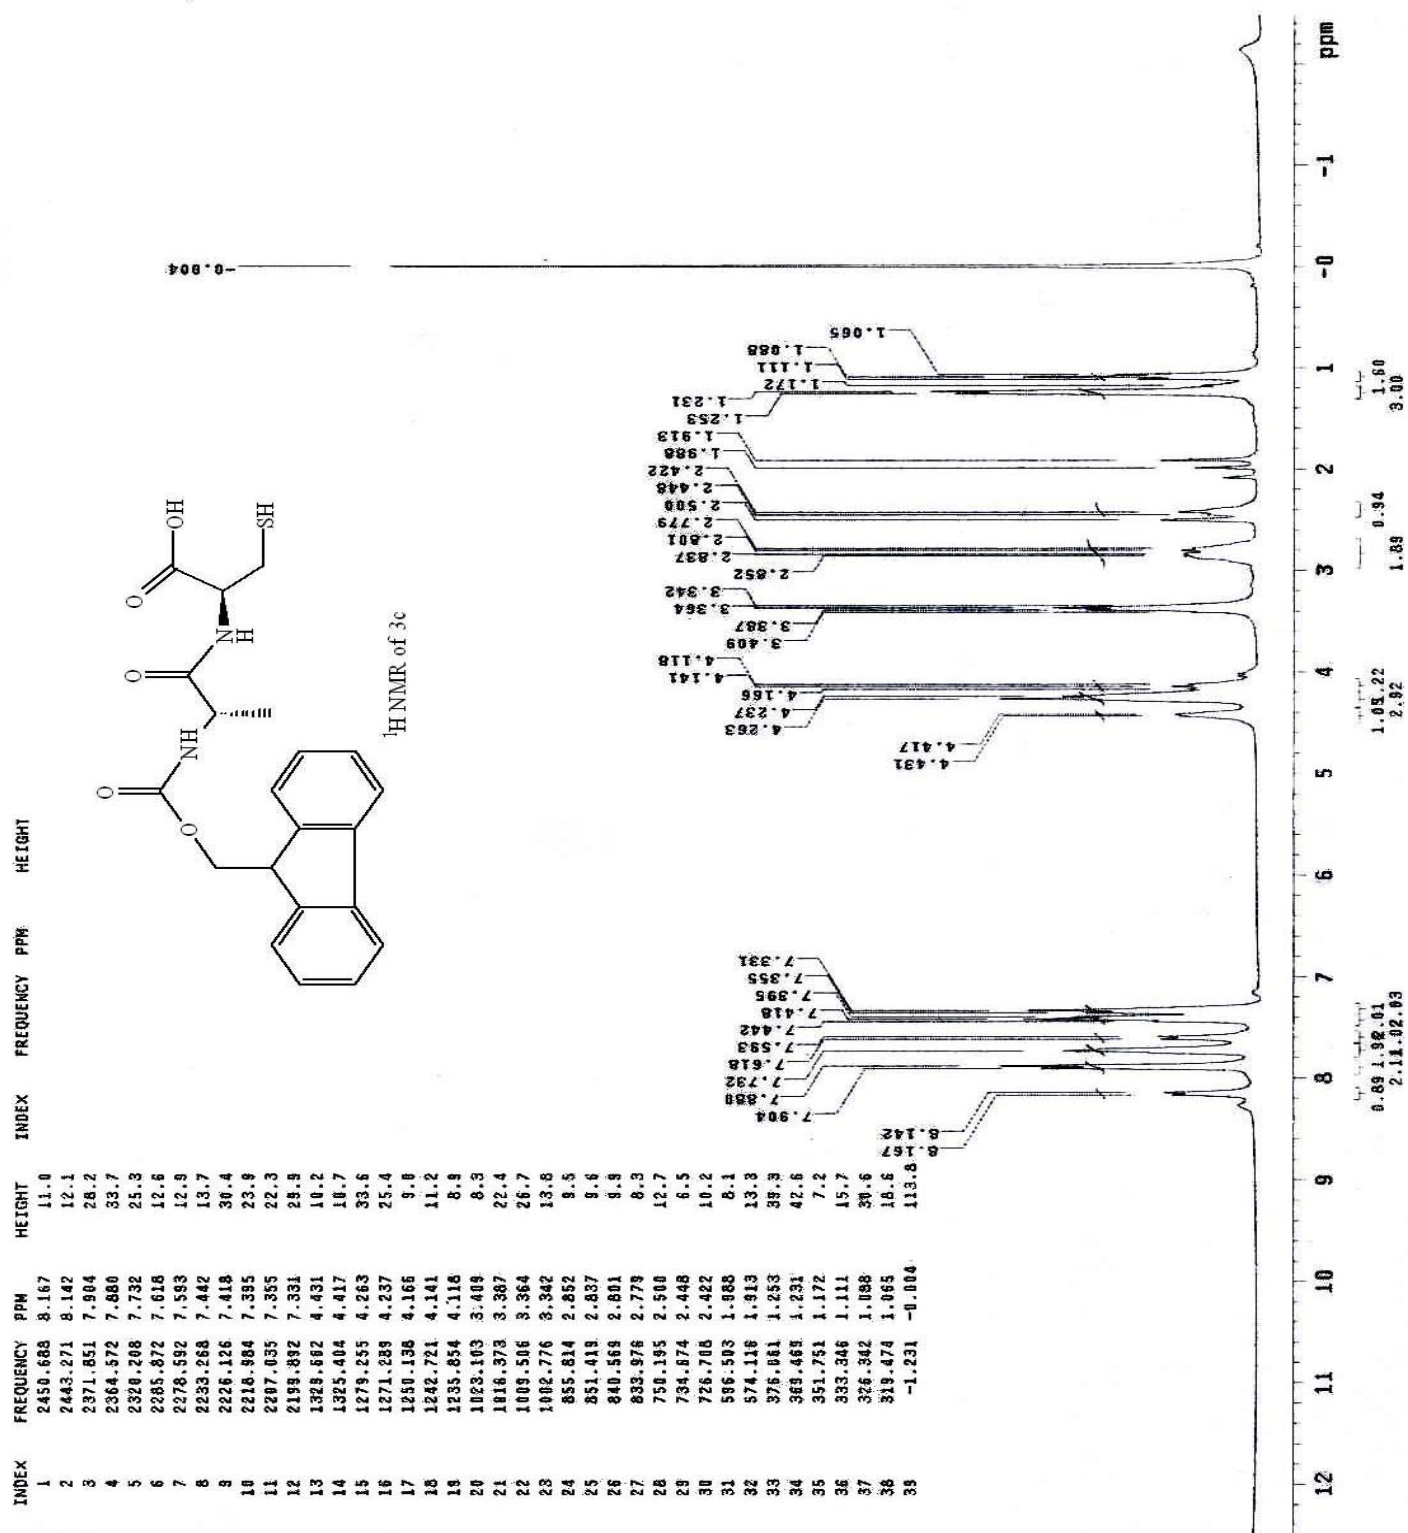

| INDEX | FREQUENCY PPM | HEIGHT  |
|-------|---------------|---------|
| 1     | 13027.954     | 172.665 |
| 2     | 12959.104     | 171.752 |
| 3     | 11739.926     | 155.594 |
| 4     | 10859.174     | 143.921 |
| 5     | 10844.874     | 143.731 |
| 6     | 10614.491     | 140.678 |
| 7     | 10211.452     | 135.336 |
| 8     | 9767.633      | 129.454 |
| 9     | 9628.344      | 127.608 |
| 10    | 9587.034      | 127.061 |
| 11    | 9456.100      | 125.299 |
| 12    | 9142.686      | 121.172 |
| 13    | 9059.006      | 120.063 |
| 14    | 4954.476      | 65.664  |
| 15    | 3882.532      | 51.457  |
| 16    | 3762.838      | 49.870  |
| 17    | 3519.215      | 46.642  |
| 18    | 3044.148      | 40.345  |
| 19    | 3022.964      | 40.065  |
| 20    | 3001.779      | 39.784  |
| 21    | 2981.124      | 39.510  |
| 22    | 2959.939      | 39.229  |
| 23    | 2939.284      | 38.955  |
| 24    | 2918.100      | 38.675  |
| 25    | 1382.211      | 18.319  |
| 26    | 8.915         | 0.118   |

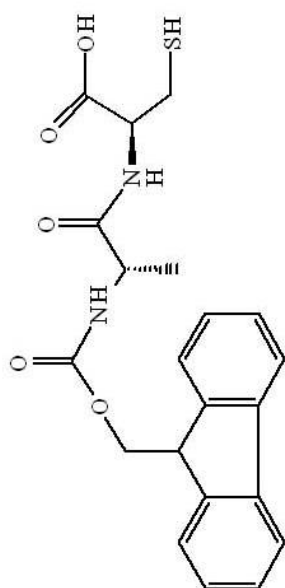

<sup>13</sup>C NMR of 3c

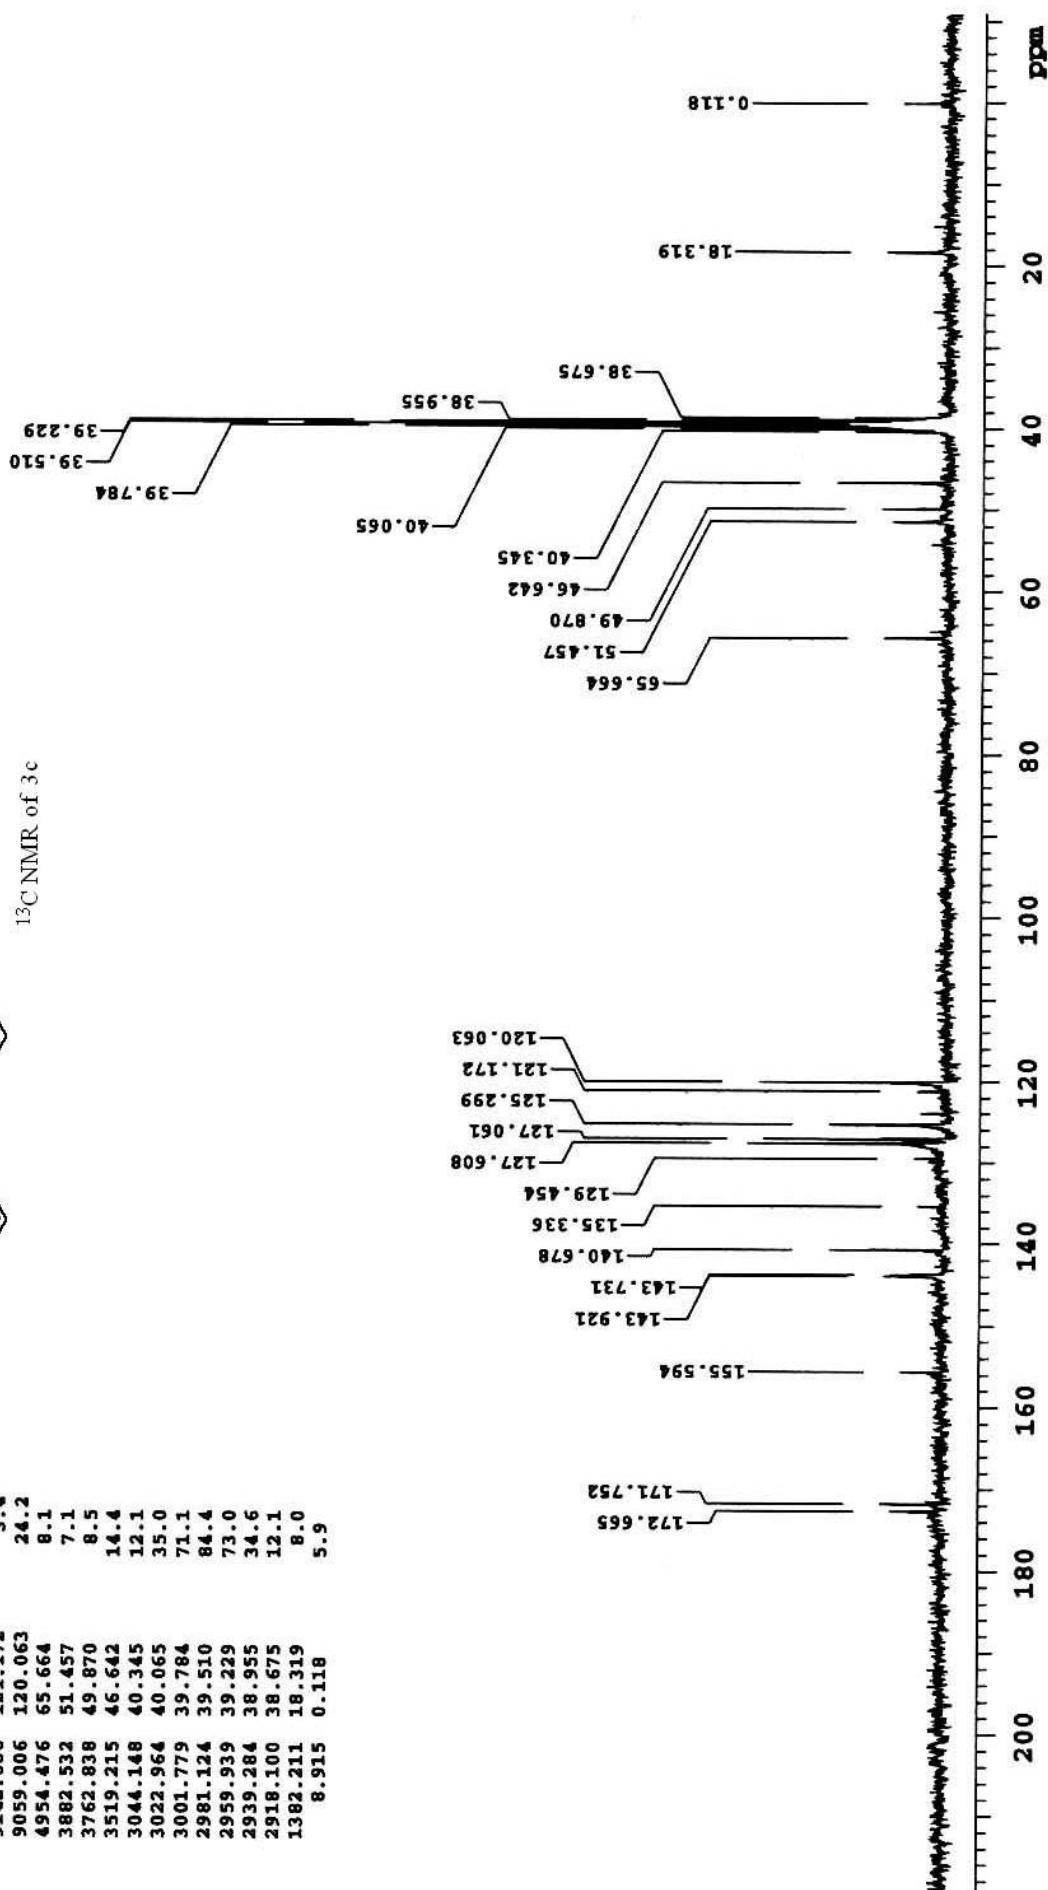



| INDEX | FREQUENCY | PPM     | HEIGHT |
|-------|-----------|---------|--------|
| 1     | 13024.649 | 172.622 | 5.2    |
| 2     | 11826.126 | 156.737 | 3.7    |
| 3     | 10843.157 | 143.709 | 5.3    |
| 4     | 10674.739 | 141.477 | 8.7    |
| 5     | 9656.286  | 127.979 | 12.9   |
| 6     | 9604.913  | 127.298 | 13.7   |
| 7     | 9447.617  | 125.214 | 9.2    |
| 8     | 9071.589  | 120.230 | 13.3   |
| 9     | 5858.934  | 77.651  | 30.5   |
| 10    | 5827.157  | 77.230  | 31.2   |
| 11    | 5795.380  | 76.809  | 31.5   |
| 12    | 5098.404  | 67.572  | 4.6    |
| 13    | 4079.421  | 54.066  | 5.3    |
| 14    | 4048.703  | 53.659  | 4.2    |
| 15    | 3565.693  | 47.258  | 6.5    |
| 16    | 3120.285  | 41.355  | 3.9    |
| 17    | 2001.734  | 26.530  | 4.5    |
| 18    | 1877.804  | 24.887  | 5.8    |
| 19    | 1739.045  | 23.048  | 6.6    |
| 20    | 1679.727  | 22.262  | 3.7    |

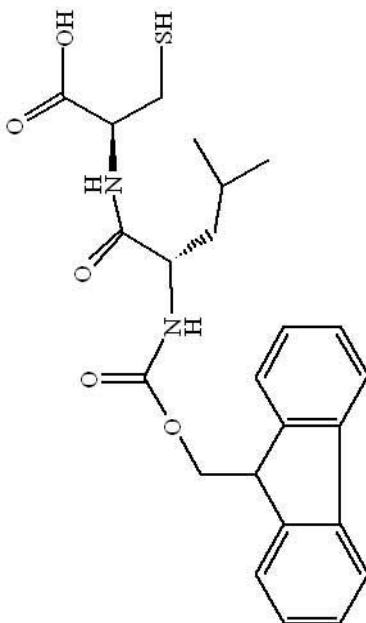

<sup>13</sup>C NMR of 3d

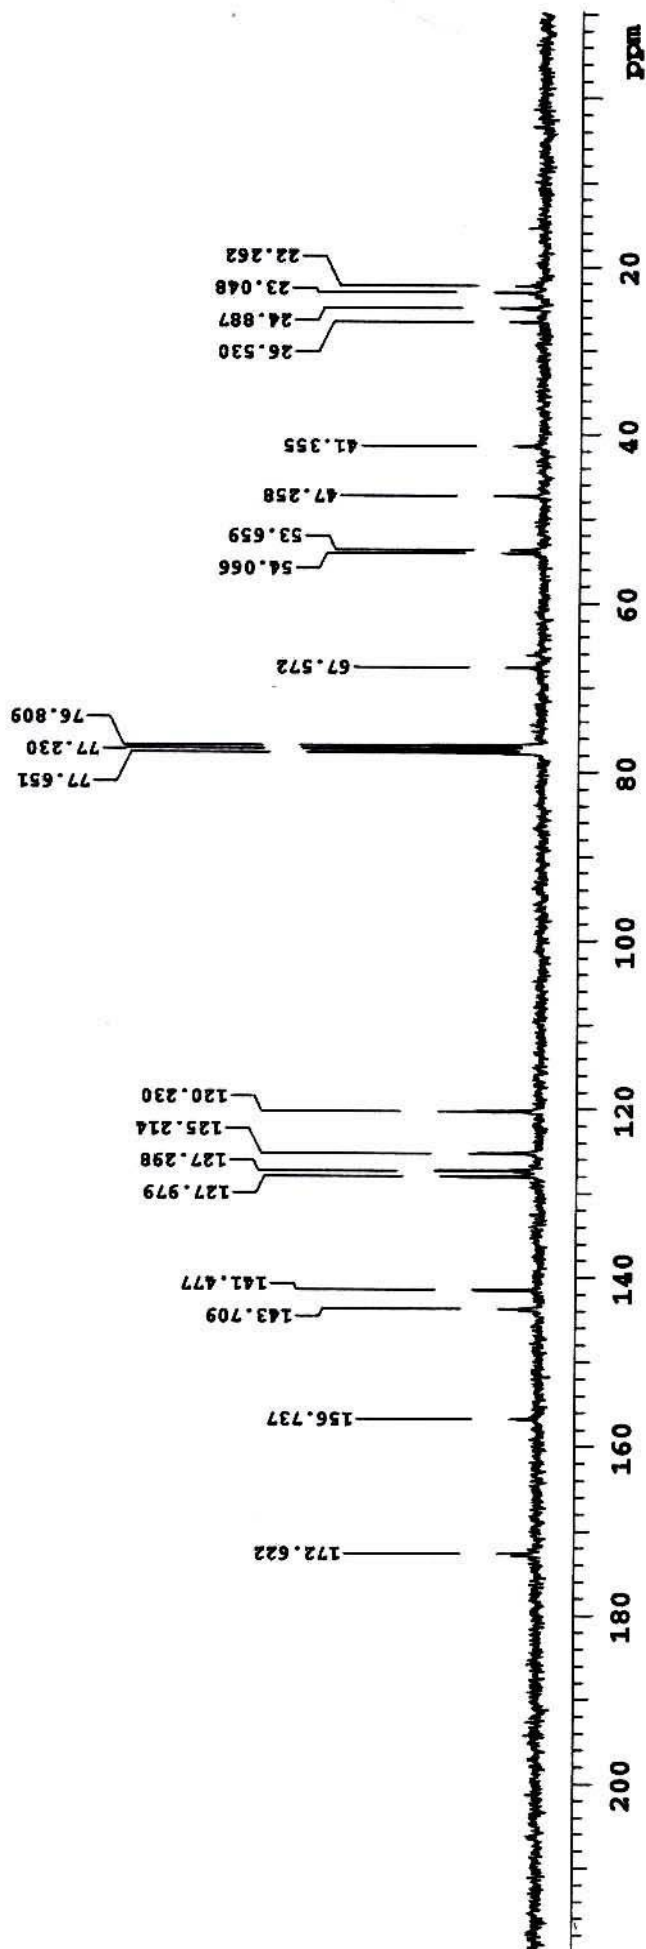



| INDEX | FREQUENCY PPM | HEIGHT |
|-------|---------------|--------|
| 1     | 2327.345      | 24.1   |
| 2     | 2319.925      | 26.1   |
| 3     | 2272.132      | 16.8   |
| 4     | 2221.451      | 14.5   |
| 5     | 2214.721      | 25.4   |
| 6     | 2207.441      | 18.1   |
| 7     | 2192.883      | 20.6   |
| 8     | 2185.603      | 28.2   |
| 9     | 2178.599      | 57.4   |
| 10    | 1313.175      | 18.4   |
| 11    | 1282.769      | 9.7    |
| 12    | 1257.137      | 11.2   |
| 13    | 1124.185      | 21.6   |
| 14    | 919.813       | 23.4   |
| 15    | 429.209       | 94.5   |
| 16    | -0.000        | 68.9   |

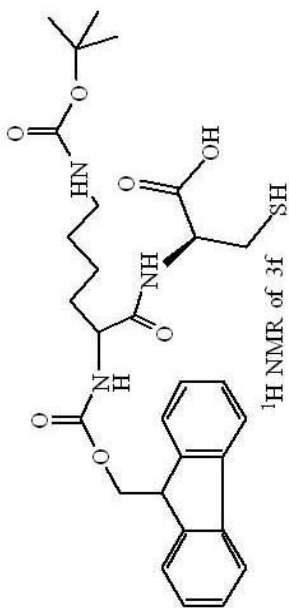

1.430

-0.000

7.356  
7.308  
7.283  
7.260

7.756  
7.731  
7.672  
7.403  
7.381

4.278  
4.208  
4.189  
3.746  
3.065

12 11 10 9 8 7 6 5 4 3 2 1 -0 -1 ppm

2.212, 31  
2.208, 08

1.17

1.44 1.22 4.00

0.86

14.85

| INDEX | FREQUENCY PPM | HEIGHT |
|-------|---------------|--------|
| 1     | 13019.882     | 10.4   |
| 2     | 11822.948     | 9.3    |
| 3     | 10863.283     | 9.1    |
| 4     | 10850.572     | 11.1   |
| 5     | 10668.384     | 23.4   |
| 6     | 9647.283      | 32.1   |
| 7     | 9599.617      | 33.2   |
| 8     | 9453.443      | 24.9   |
| 9     | 9062.056      | 33.6   |
| 10    | 6020.997      | 4.1    |
| 11    | 5858.934      | 19.4   |
| 12    | 5827.157      | 19.8   |
| 13    | 5795.380      | 19.1   |
| 14    | 5086.223      | 7.8    |
| 15    | 4148.801      | 6.4    |
| 16    | 4086.306      | 6.7    |
| 17    | 3563.045      | 14.4   |
| 18    | 3042.961      | 6.4    |
| 19    | 2629.331      | 4.4    |
| 20    | 2439.728      | 32.335 |
| 21    | 2397.358      | 31.773 |
| 22    | 2238.473      | 29.668 |
| 23    | 2206.696      | 29.246 |
| 24    | 2156.383      | 28.580 |
| 25    | 2007.561      | 26.607 |
| 26    | 1921.233      | 25.463 |
| 27    | 1723.686      | 22.845 |
| 28    | 1575.923      | 20.886 |
| 29    | 1079.672      | 14.309 |
| 30    | 876.829       | 11.621 |

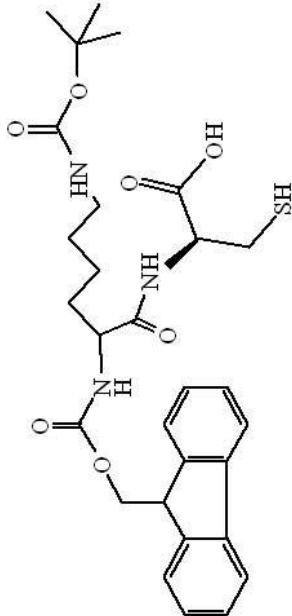

<sup>13</sup>C NMR of 3f

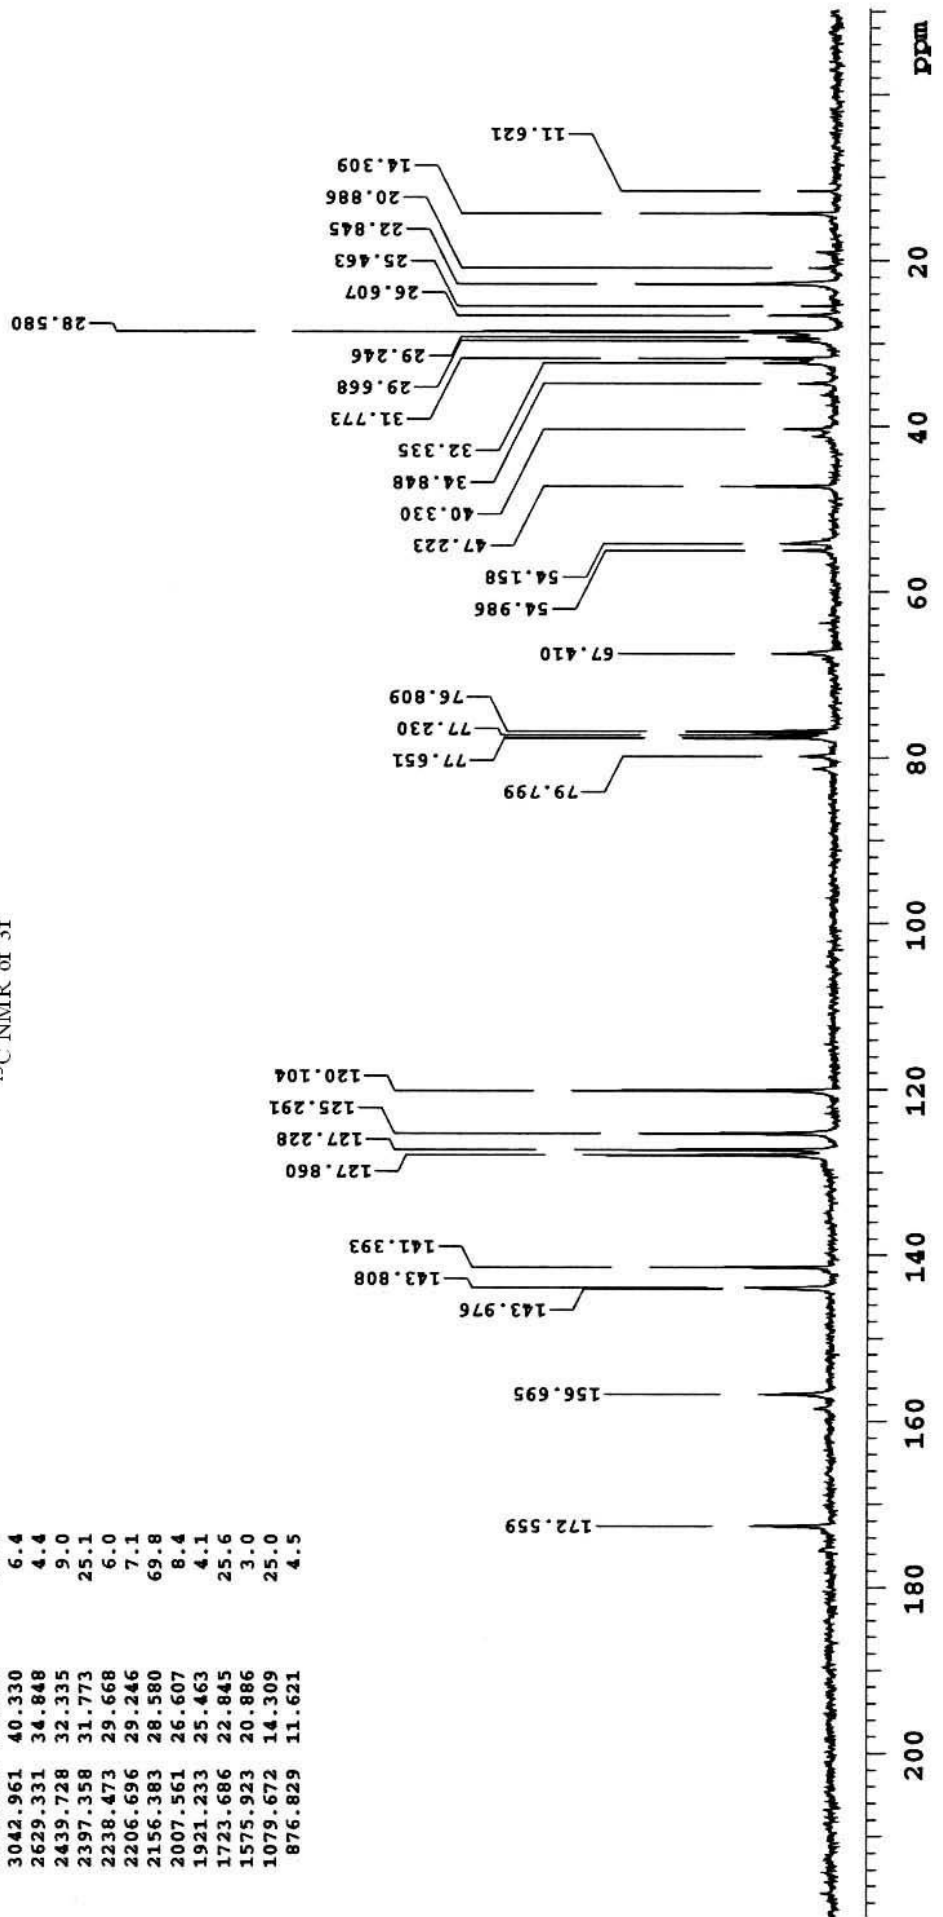





| INDEX | FREQUENCY PPM | HEIGHT  |
|-------|---------------|---------|
| 1     | 12990.352     | 172.166 |
| 2     | 12929.446     | 171.359 |
| 3     | 11755.815     | 155.804 |
| 4     | 10841.696     | 143.689 |
| 5     | 10609.194     | 140.608 |
| 6     | 10427.536     | 138.200 |
| 7     | 9749.626      | 129.216 |
| 8     | 9656.944      | 127.987 |
| 9     | 9626.755      | 127.587 |
| 10    | 9584.386      | 127.026 |
| 11    | 9520.302      | 126.176 |
| 12    | 9449.334      | 125.236 |
| 13    | 9057.417      | 120.041 |
| 14    | 4951.828      | 65.629  |
| 15    | 4226.783      | 56.019  |
| 16    | 4092.790      | 54.243  |
| 17    | 3633.082      | 48.151  |
| 18    | 3511.270      | 46.536  |
| 19    | 3044.148      | 40.345  |
| 20    | 3022.964      | 40.065  |
| 21    | 3001.779      | 39.784  |
| 22    | 2981.124      | 39.510  |
| 23    | 2959.939      | 39.229  |
| 24    | 2938.755      | 38.948  |
| 25    | 2918.100      | 38.675  |
| 26    | 2821.709      | 37.397  |
| 27    | 1929.835      | 25.577  |
| 28    | 1366.734      | 18.087  |

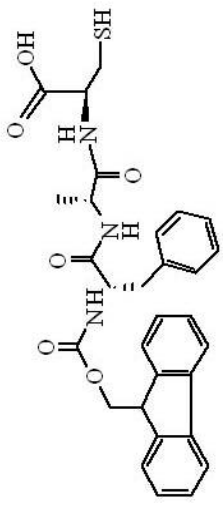

<sup>13</sup>C NMR of 7b

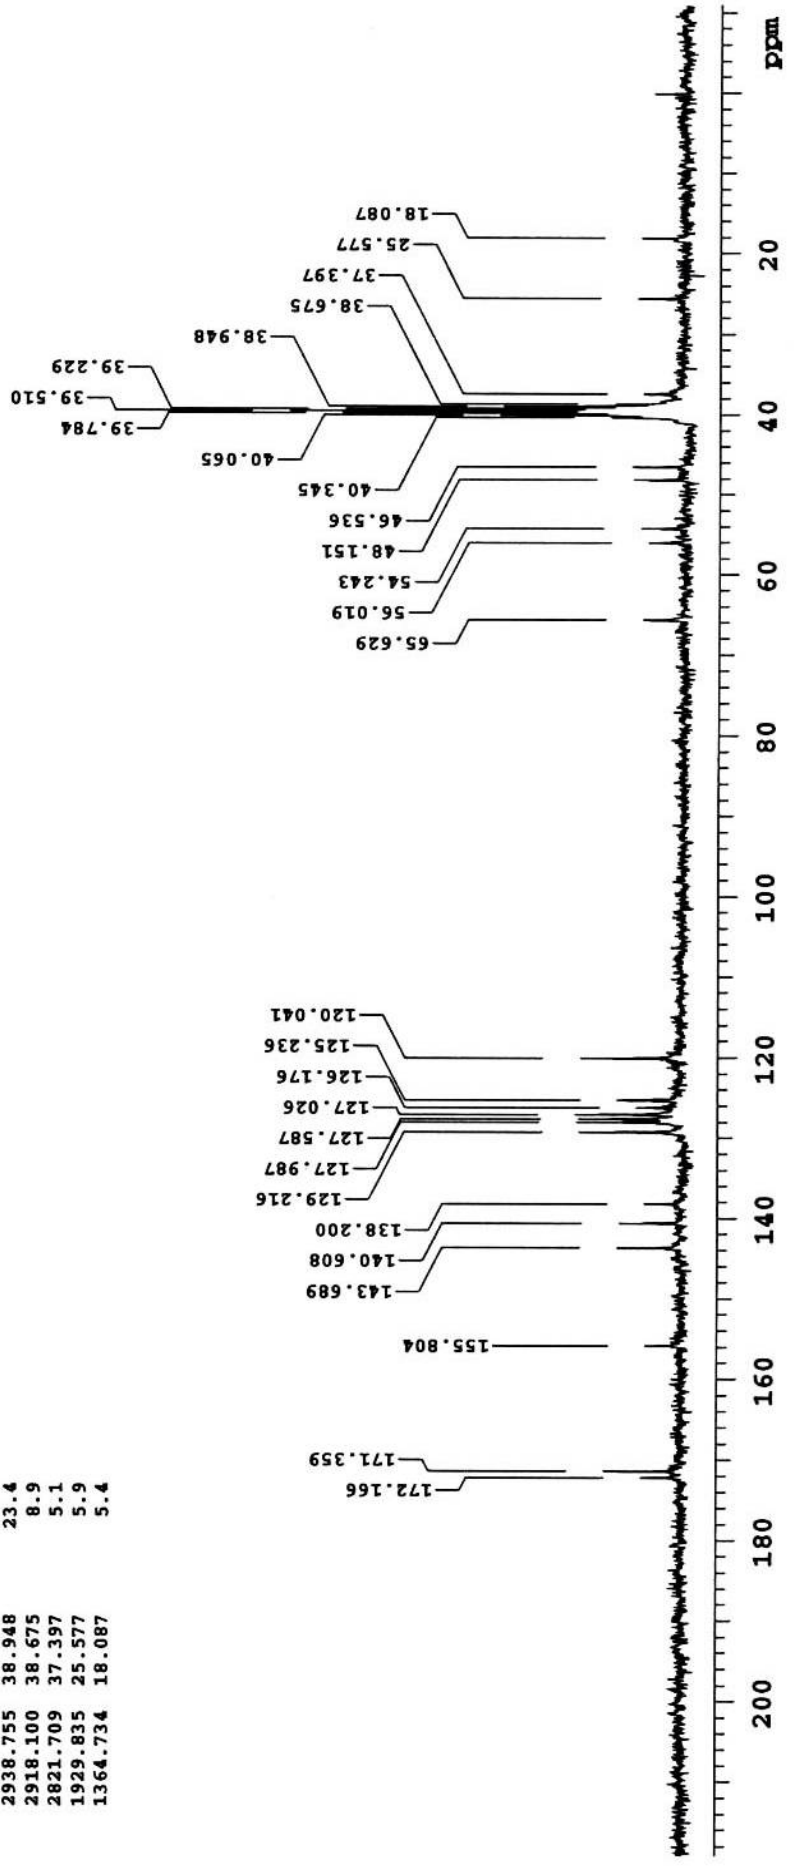

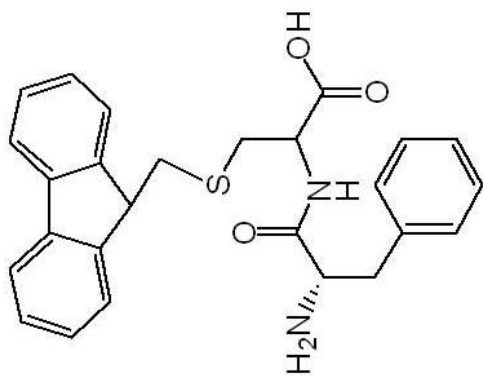

<sup>1</sup>H NMR of 4a

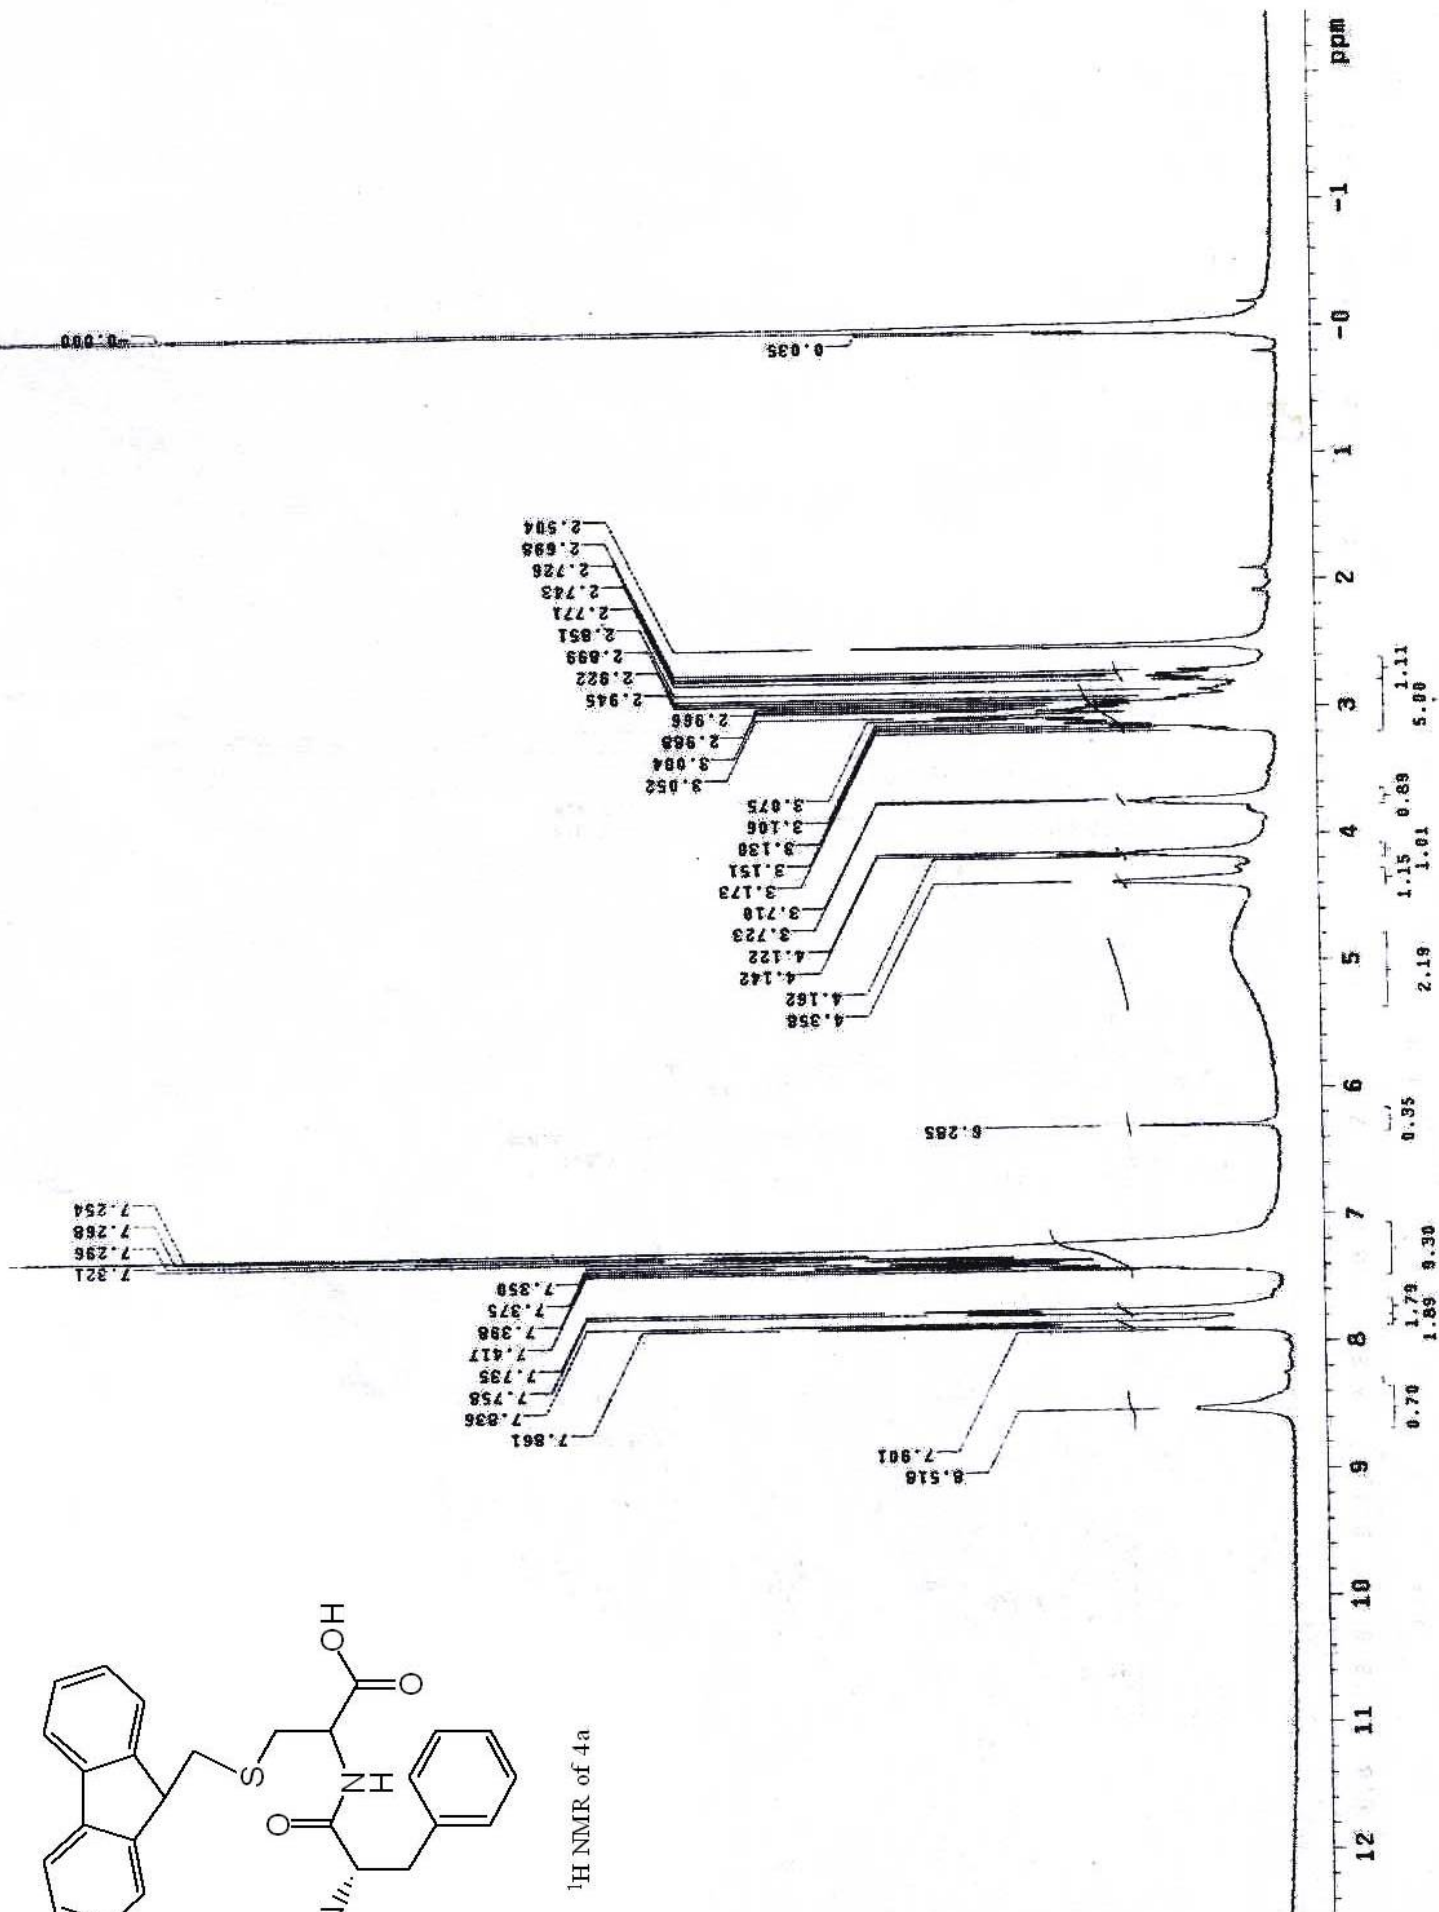

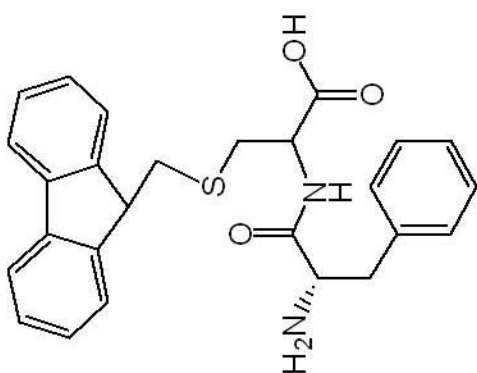

<sup>13</sup>C NMR of 4a

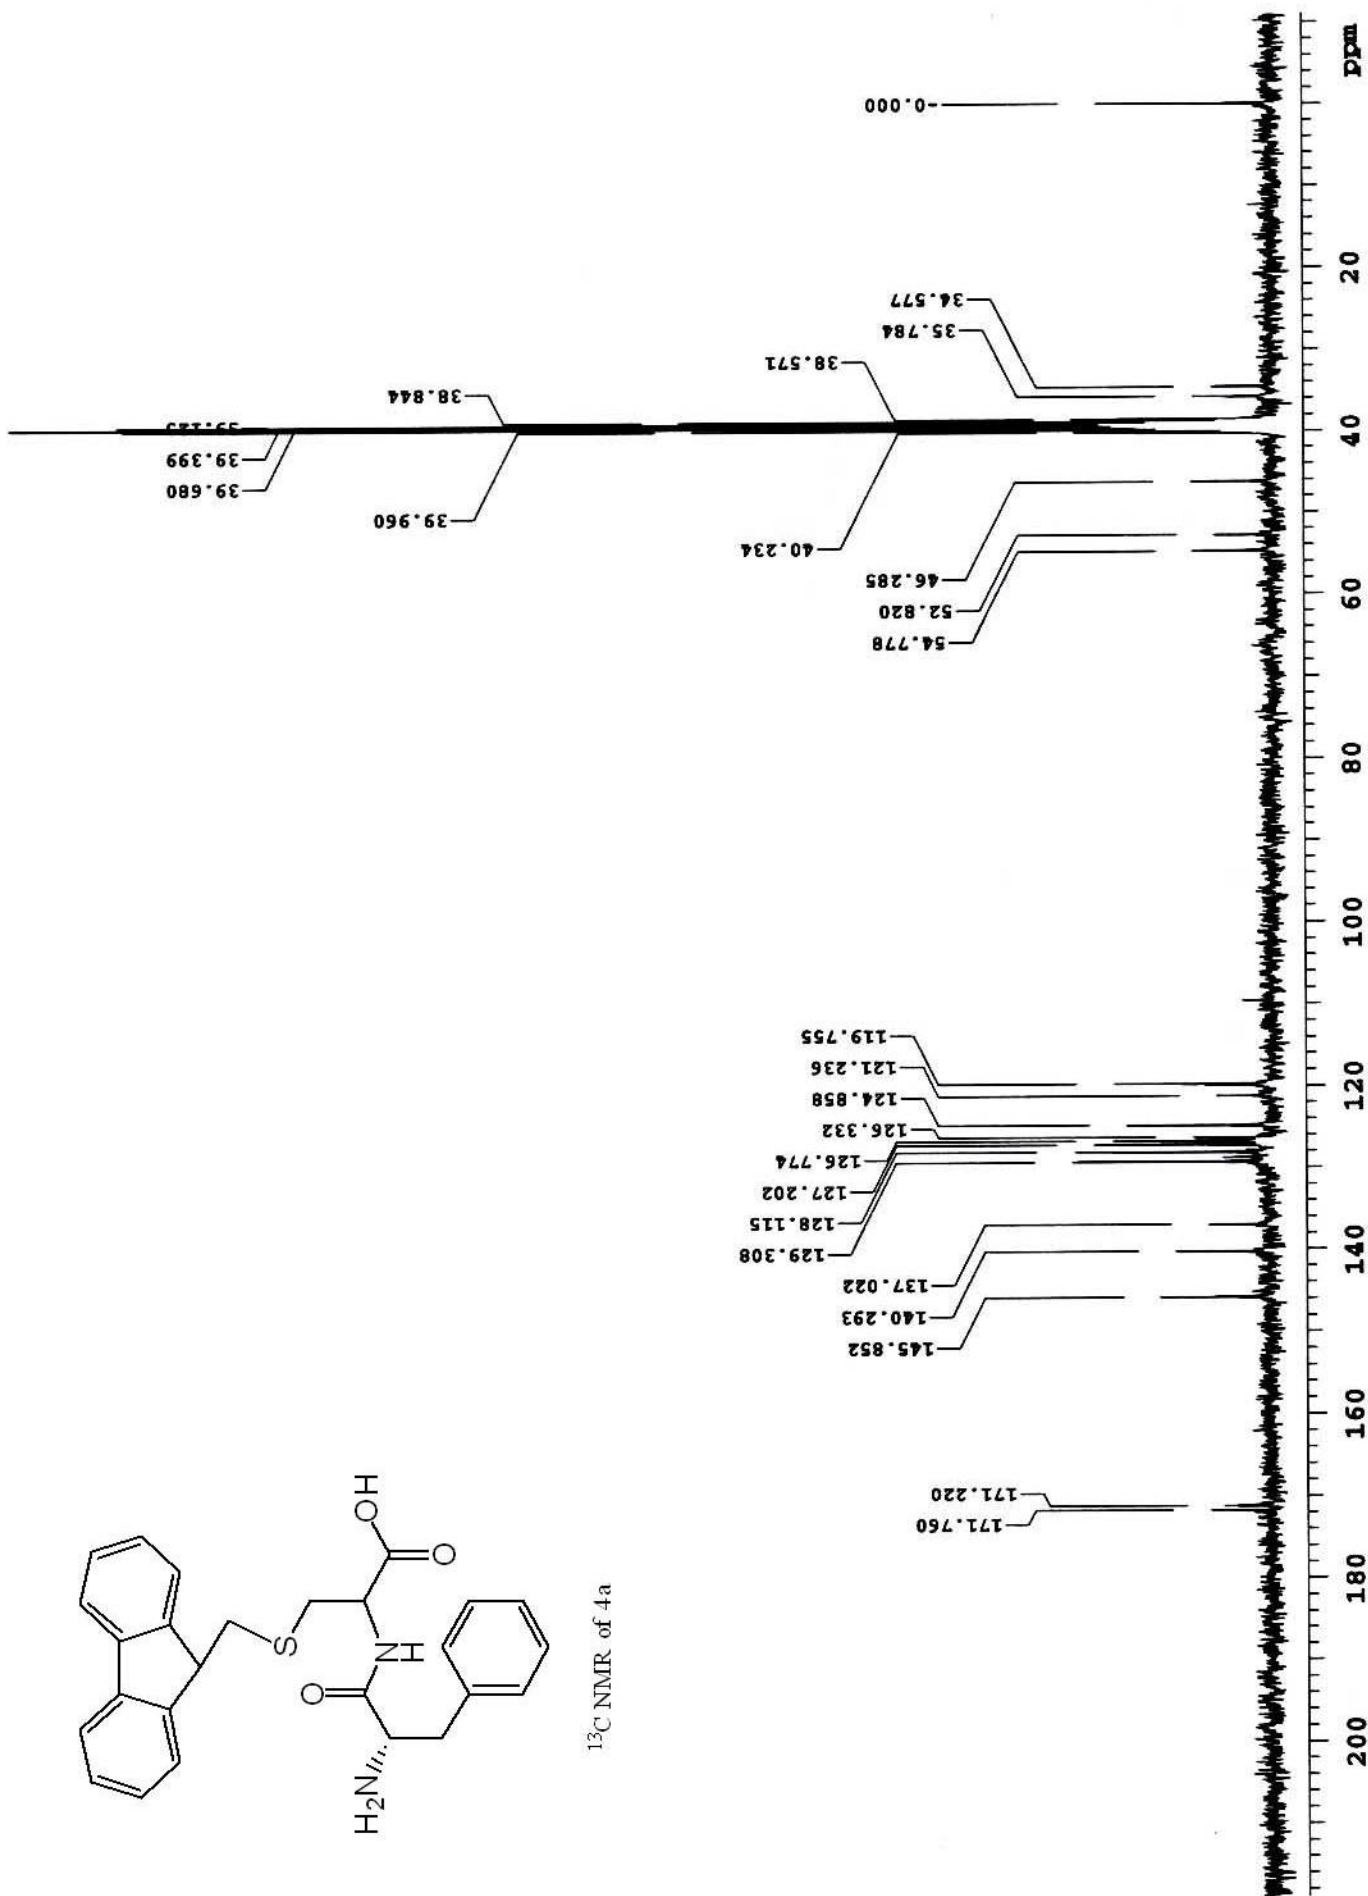

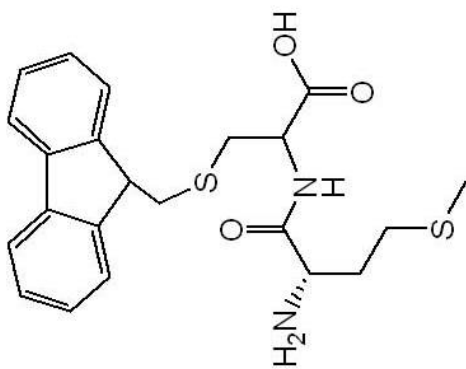

<sup>1</sup>H NMR of 4b

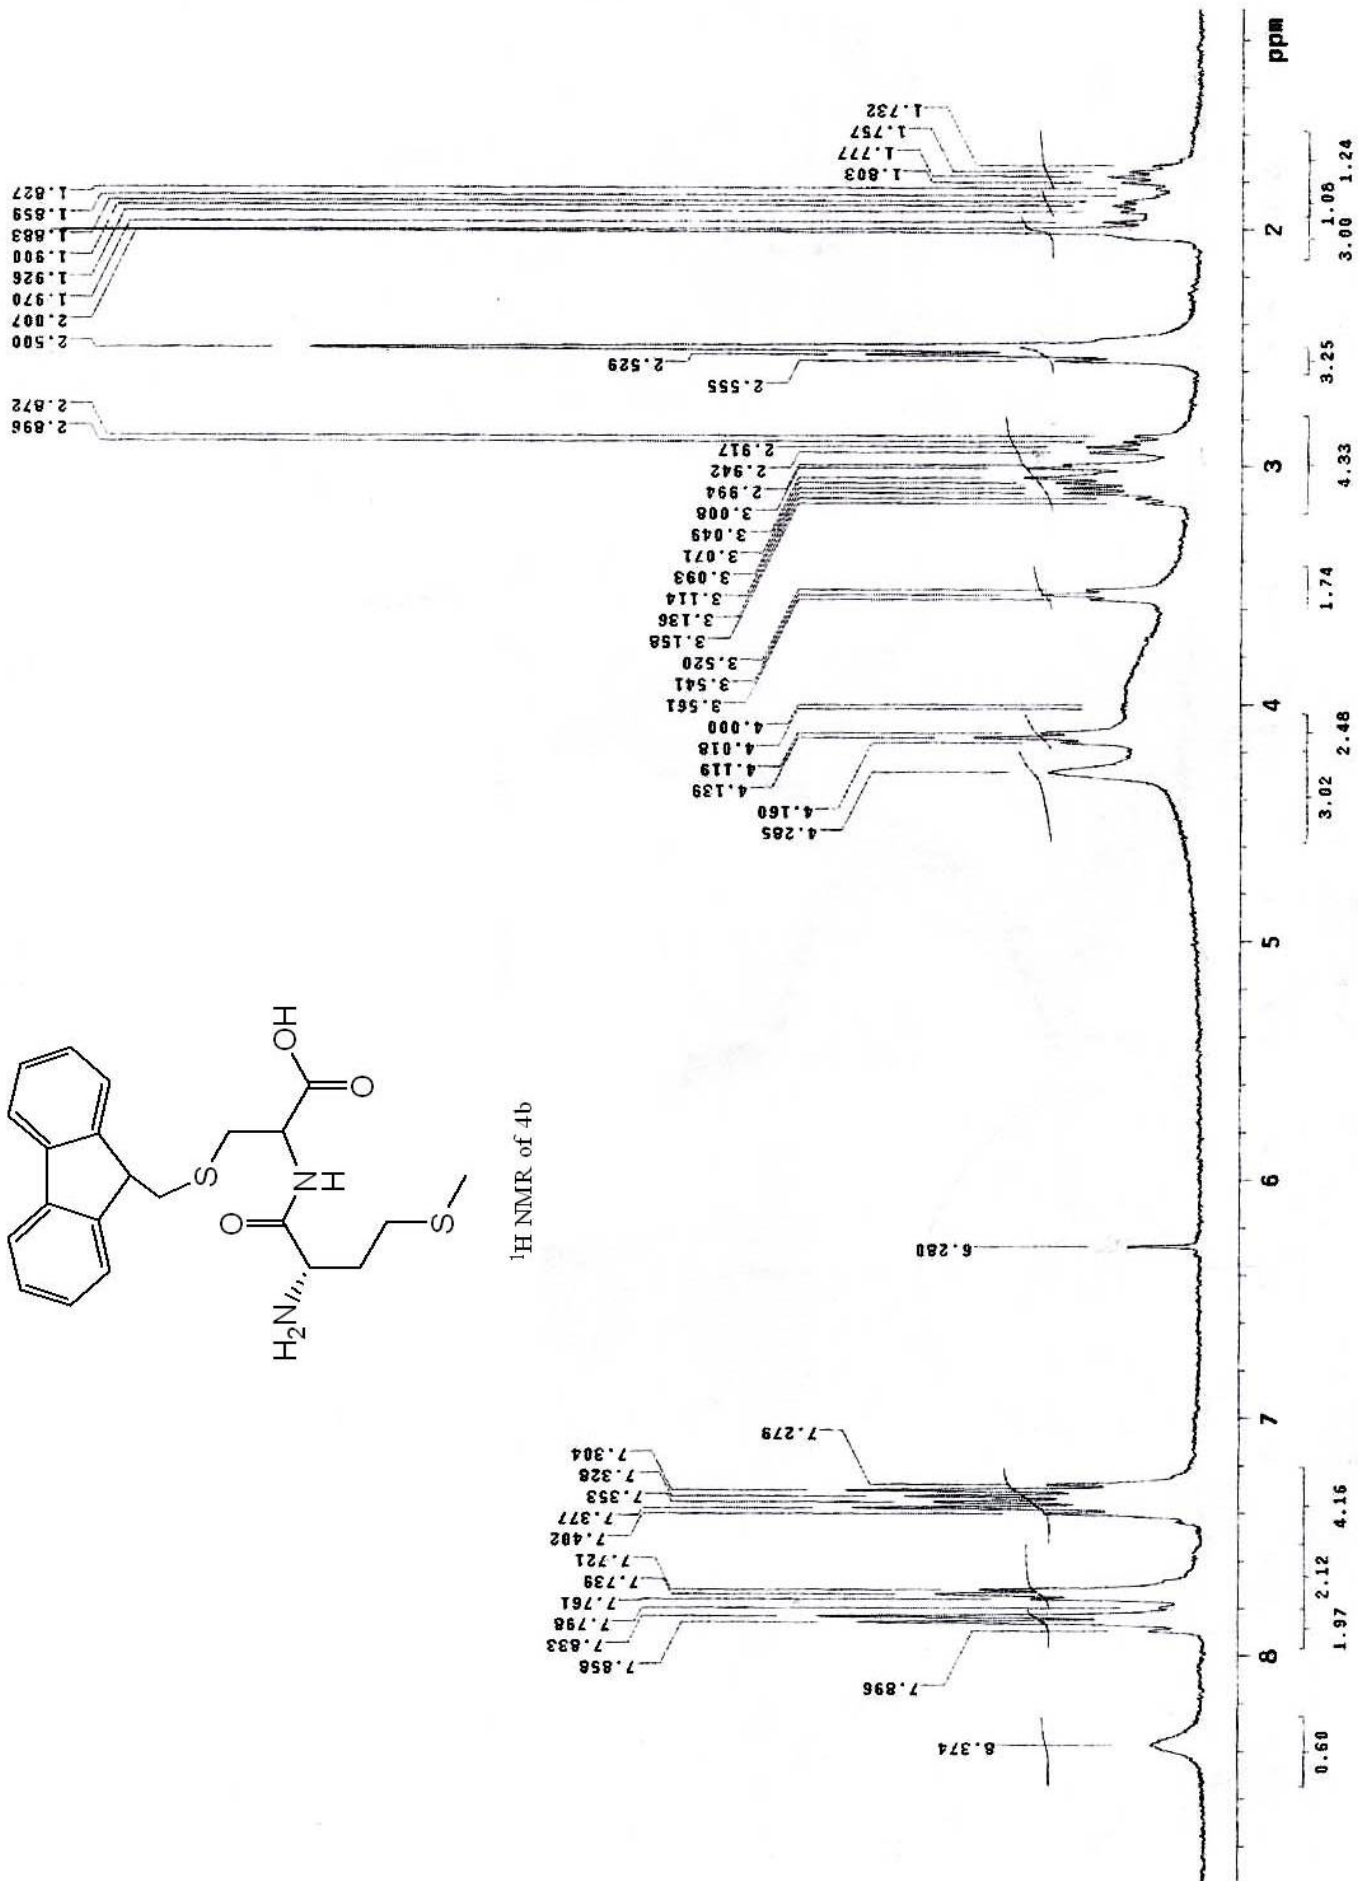

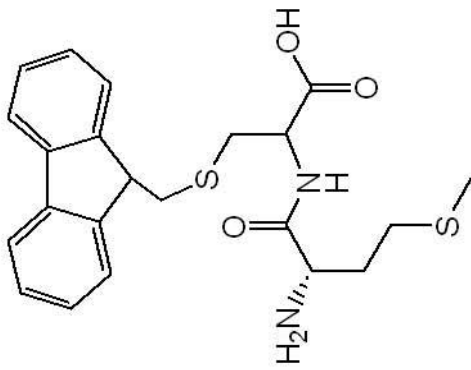

$^{13}C$  NMR of 4b

| INDEX | FREQUENCY PPM | HEIGHT  |
|-------|---------------|---------|
| 1     | 13020.009     | 172.559 |
| 2     | 12811.340     | 169.794 |
| 3     | 11036.065     | 146.265 |
| 4     | 10617.667     | 140.720 |
| 5     | 9635.228      | 127.699 |
| 6     | 9603.451      | 127.278 |
| 7     | 9454.629      | 125.306 |
| 8     | 9066.420      | 120.161 |
| 9     | 4083.255      | 54.117  |
| 10    | 3975.743      | 52.692  |
| 11    | 3526.628      | 46.740  |
| 12    | 3044.147      | 40.345  |
| 13    | 3023.492      | 40.072  |
| 14    | 3002.308      | 39.791  |
| 15    | 2981.123      | 39.510  |
| 16    | 2960.468      | 39.236  |
| 17    | 2939.283      | 38.955  |
| 18    | 2918.628      | 38.682  |
| 19    | 2724.788      | 36.113  |
| 20    | 2665.471      | 35.327  |
| 21    | 2443.032      | 32.378  |
| 22    | 2177.694      | 28.862  |
| 23    | 1114.224      | 14.767  |

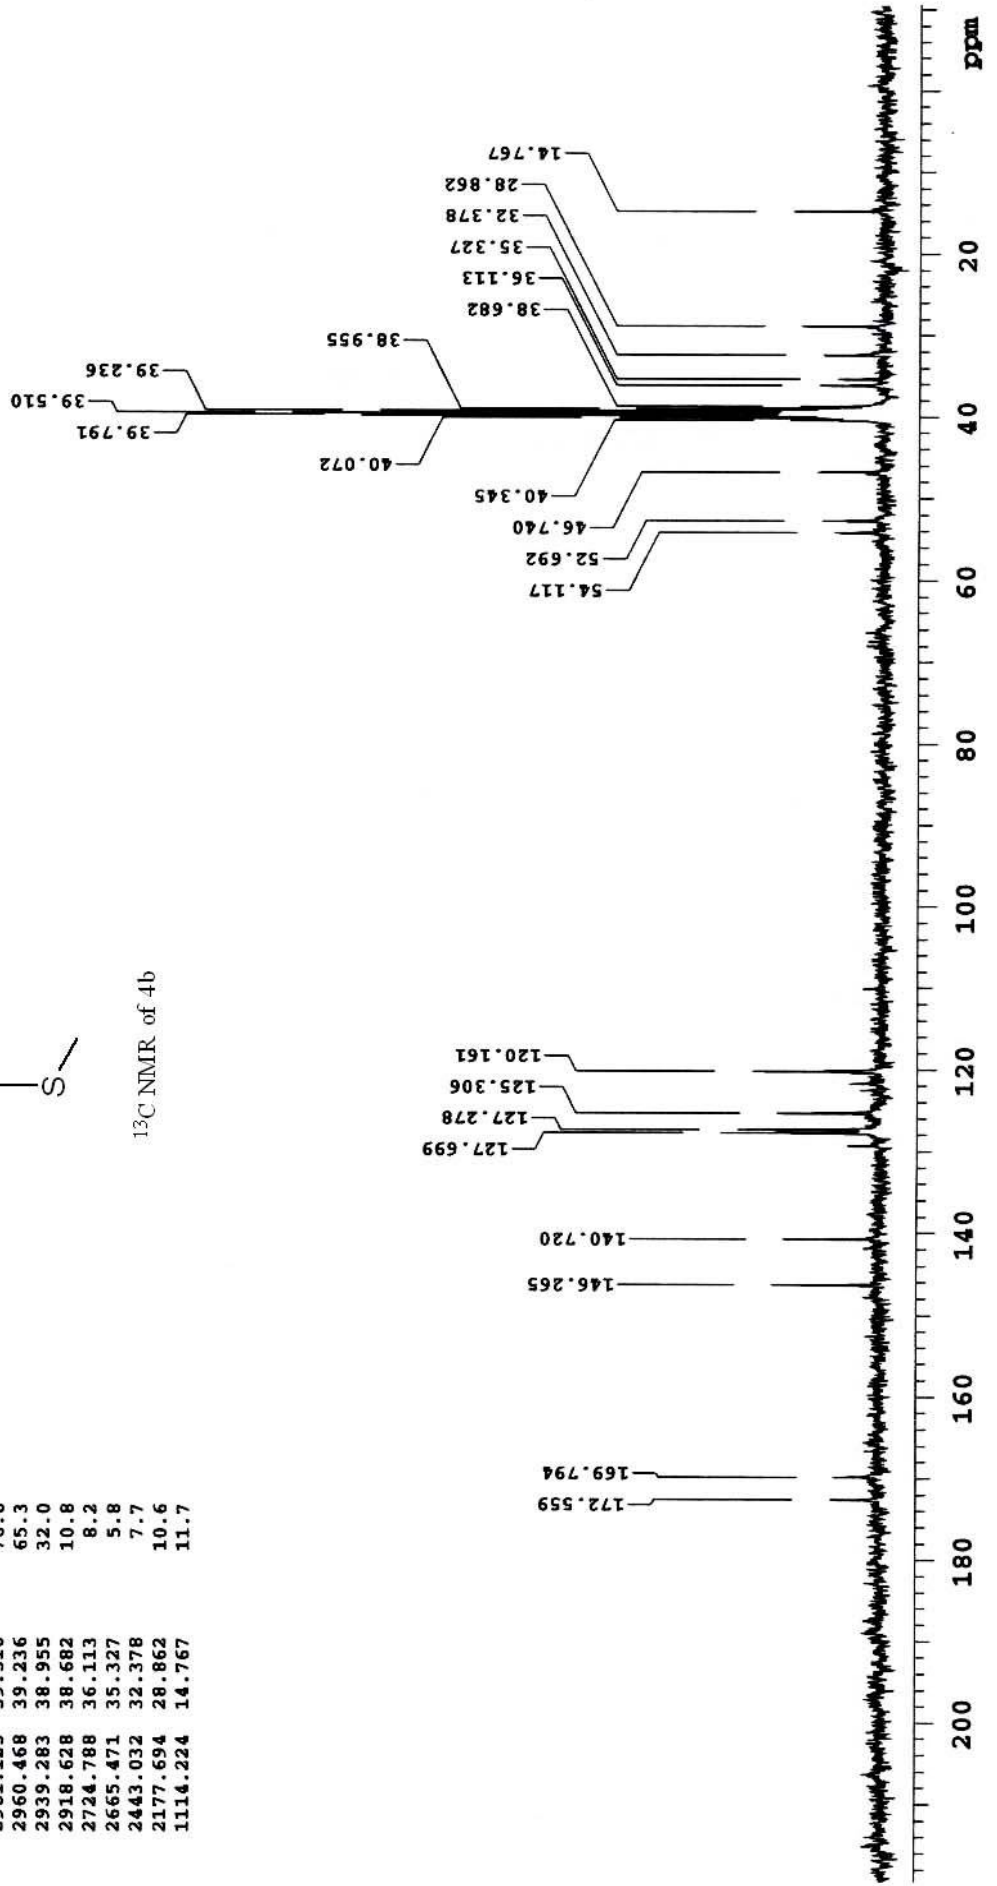



| INDEX | FREQUENCY PPM | HEIGHT |
|-------|---------------|--------|
| 1     | 2064.761      | 6.881  |
| 2     | 2034.090      | 6.779  |
| 3     | 1999.036      | 6.662  |
| 4     | 1988.666      | 6.627  |
| 5     | 1397.871      | 4.659  |
| 6     | 1394.073      | 4.646  |
| 7     | 1375.524      | 4.584  |
| 8     | 1175.720      | 3.918  |
| 9     | 1163.451      | 3.877  |
| 10    | 1114.231      | 3.713  |
| 11    | 959.412       | 3.197  |
| 12    | 957.951       | 3.192  |
| 13    | 955.468       | 3.184  |
| 14    | 950.210       | 3.167  |
| 15    | 680.737       | 2.269  |
| 16    | 673.580       | 2.245  |
| 17    | 666.132       | 2.220  |
| 18    | 344.225       | 1.147  |

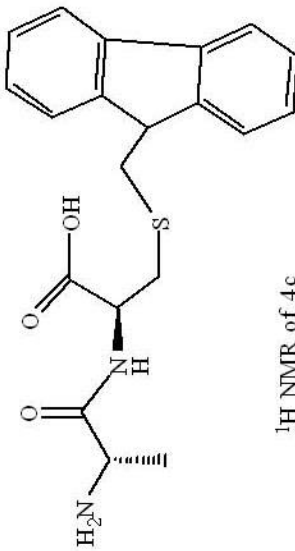

<sup>1</sup>H NMR of 4c

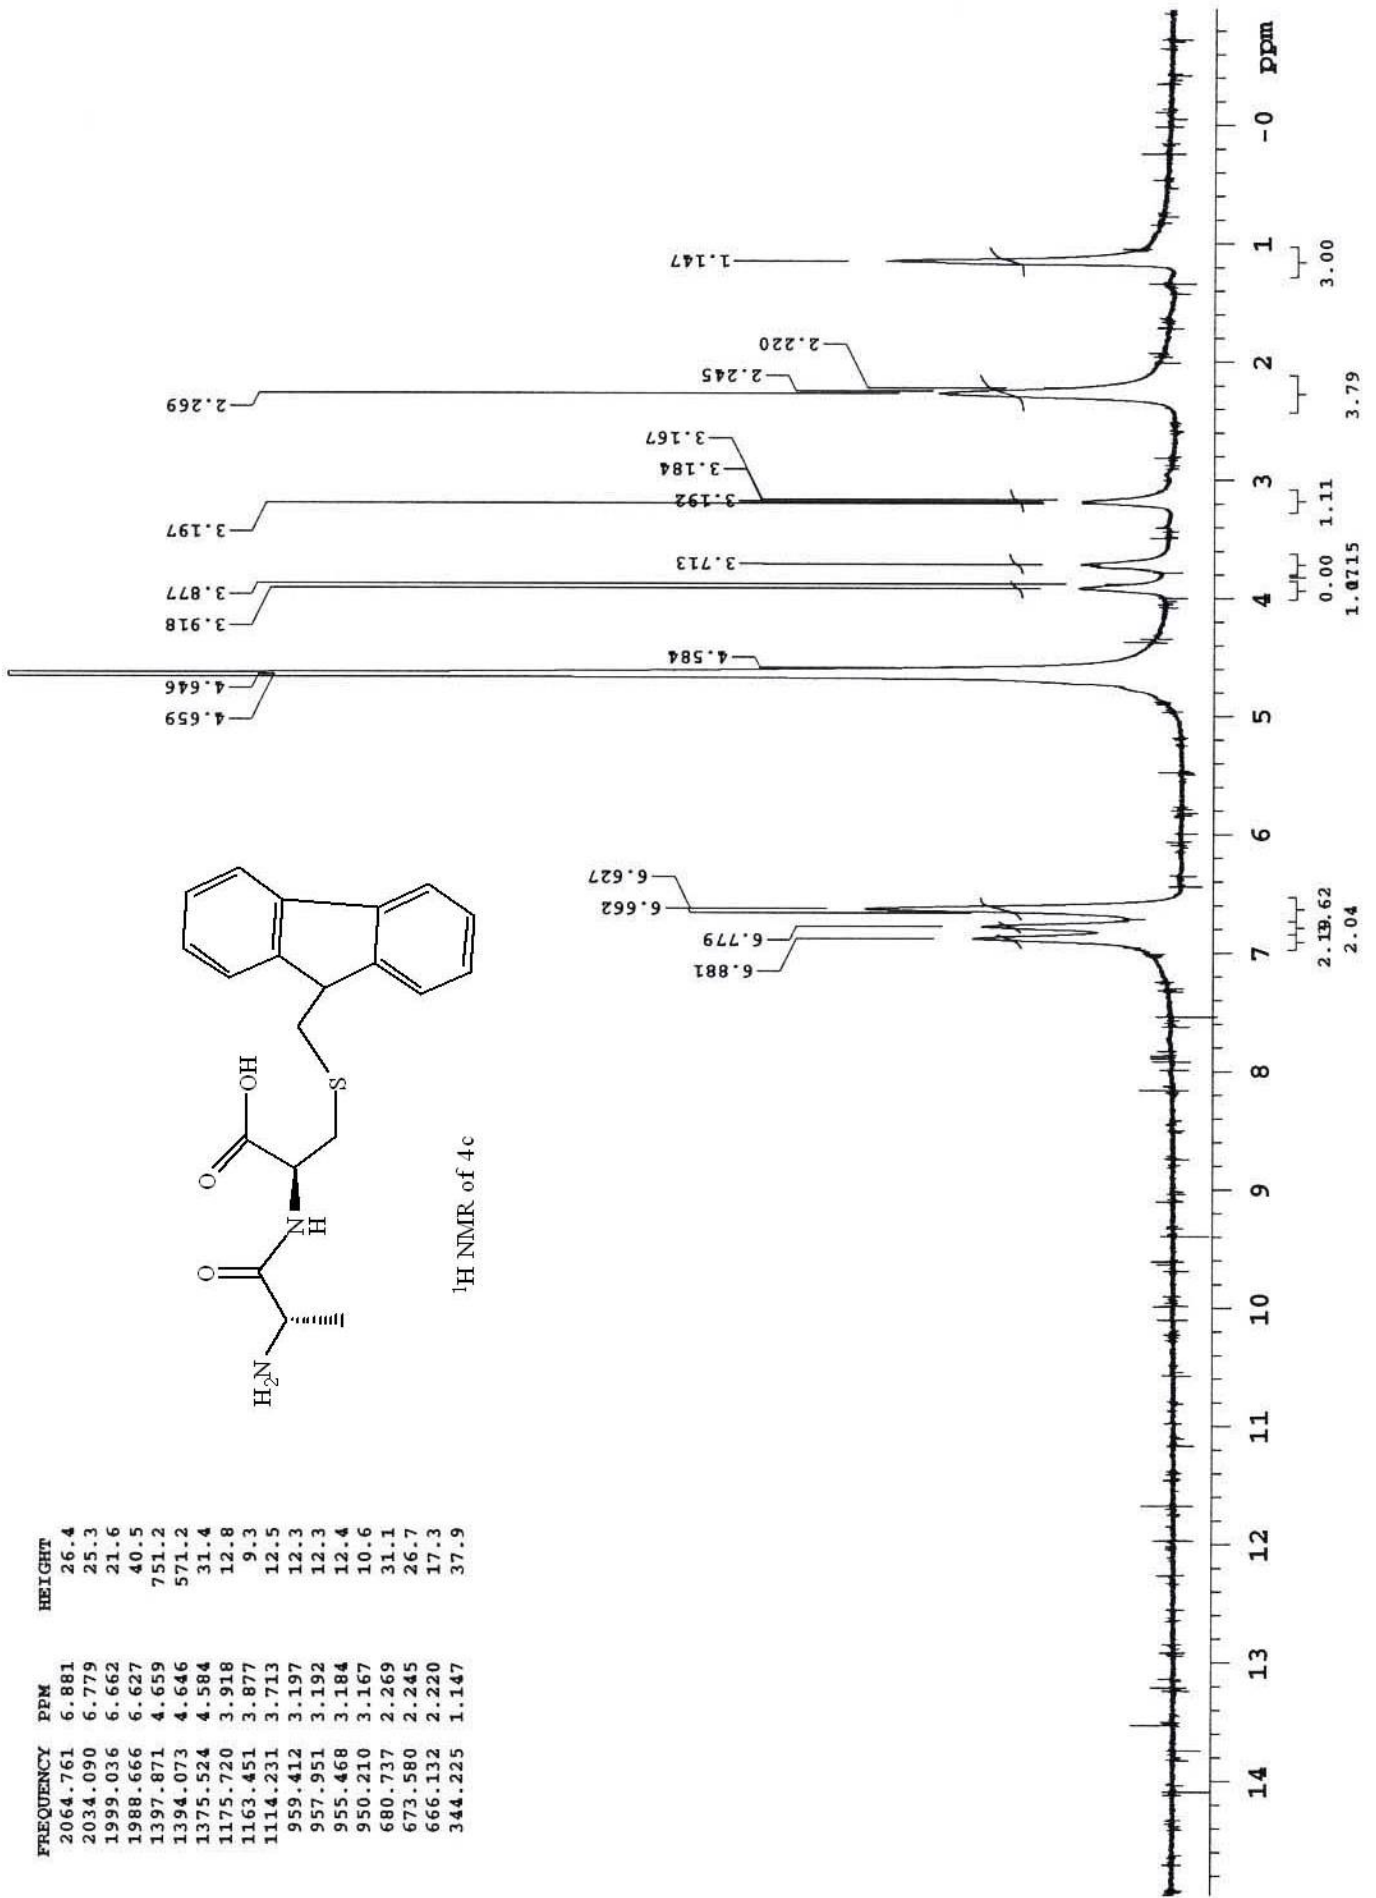

| INDEX | FREQUENCY | PPM     | HEIGHT |
|-------|-----------|---------|--------|
| 1     | 13047.771 | 172.928 | 10.2   |
| 2     | 12882.001 | 170.731 | 9.2    |
| 3     | 10974.851 | 145.454 | 17.3   |
| 4     | 10603.590 | 140.534 | 16.8   |
| 5     | 9606.851  | 127.324 | 15.0   |
| 6     | 9582.488  | 127.001 | 12.5   |
| 7     | 9407.185  | 124.677 | 11.6   |
| 8     | 9026.391  | 119.631 | 12.1   |
| 9     | 3972.258  | 52.646  | 9.7    |
| 10    | 3697.916  | 49.010  | 10.9   |
| 11    | 3474.948  | 46.055  | 7.4    |
| 12    | 2674.697  | 35.449  | 6.0    |
| 13    | 2473.442  | 32.782  | 7.3    |
| 14    | 1255.324  | 16.637  | 19.2   |

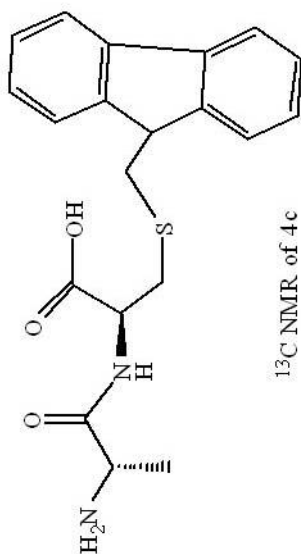

<sup>13</sup>C NMR of 4c

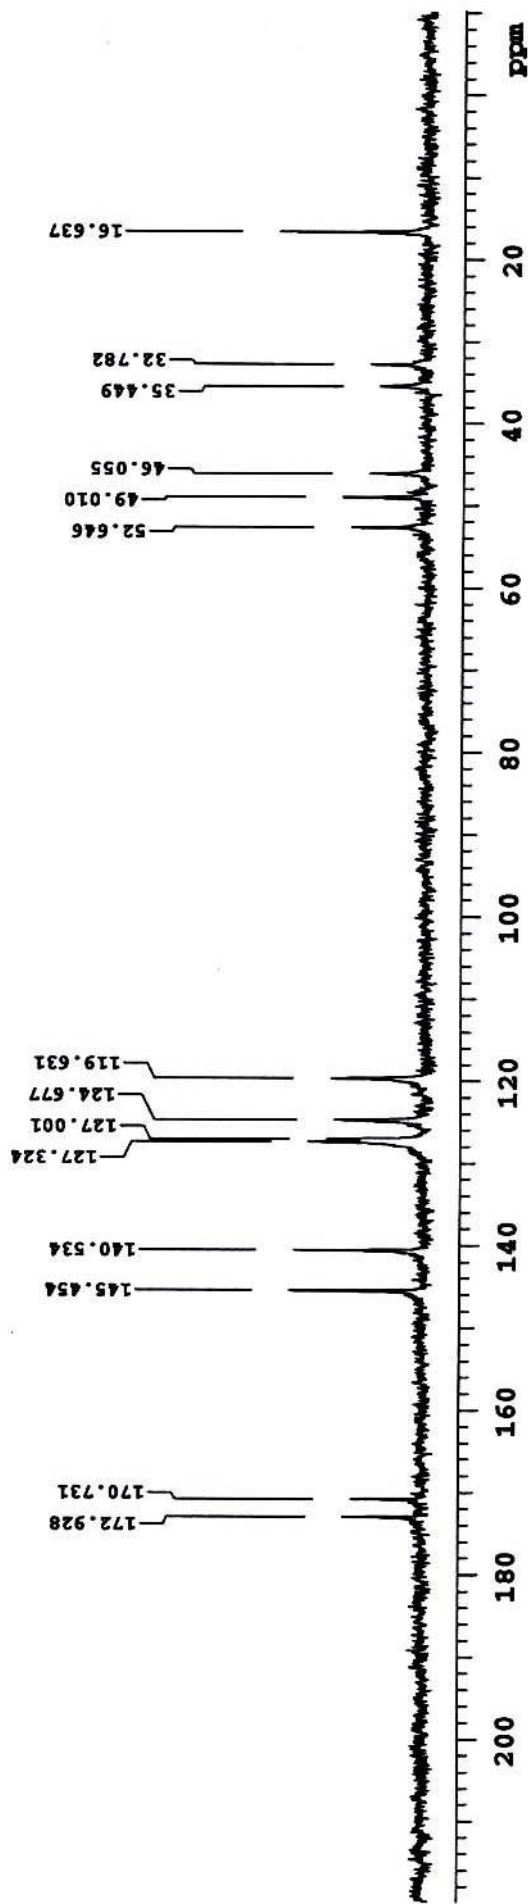

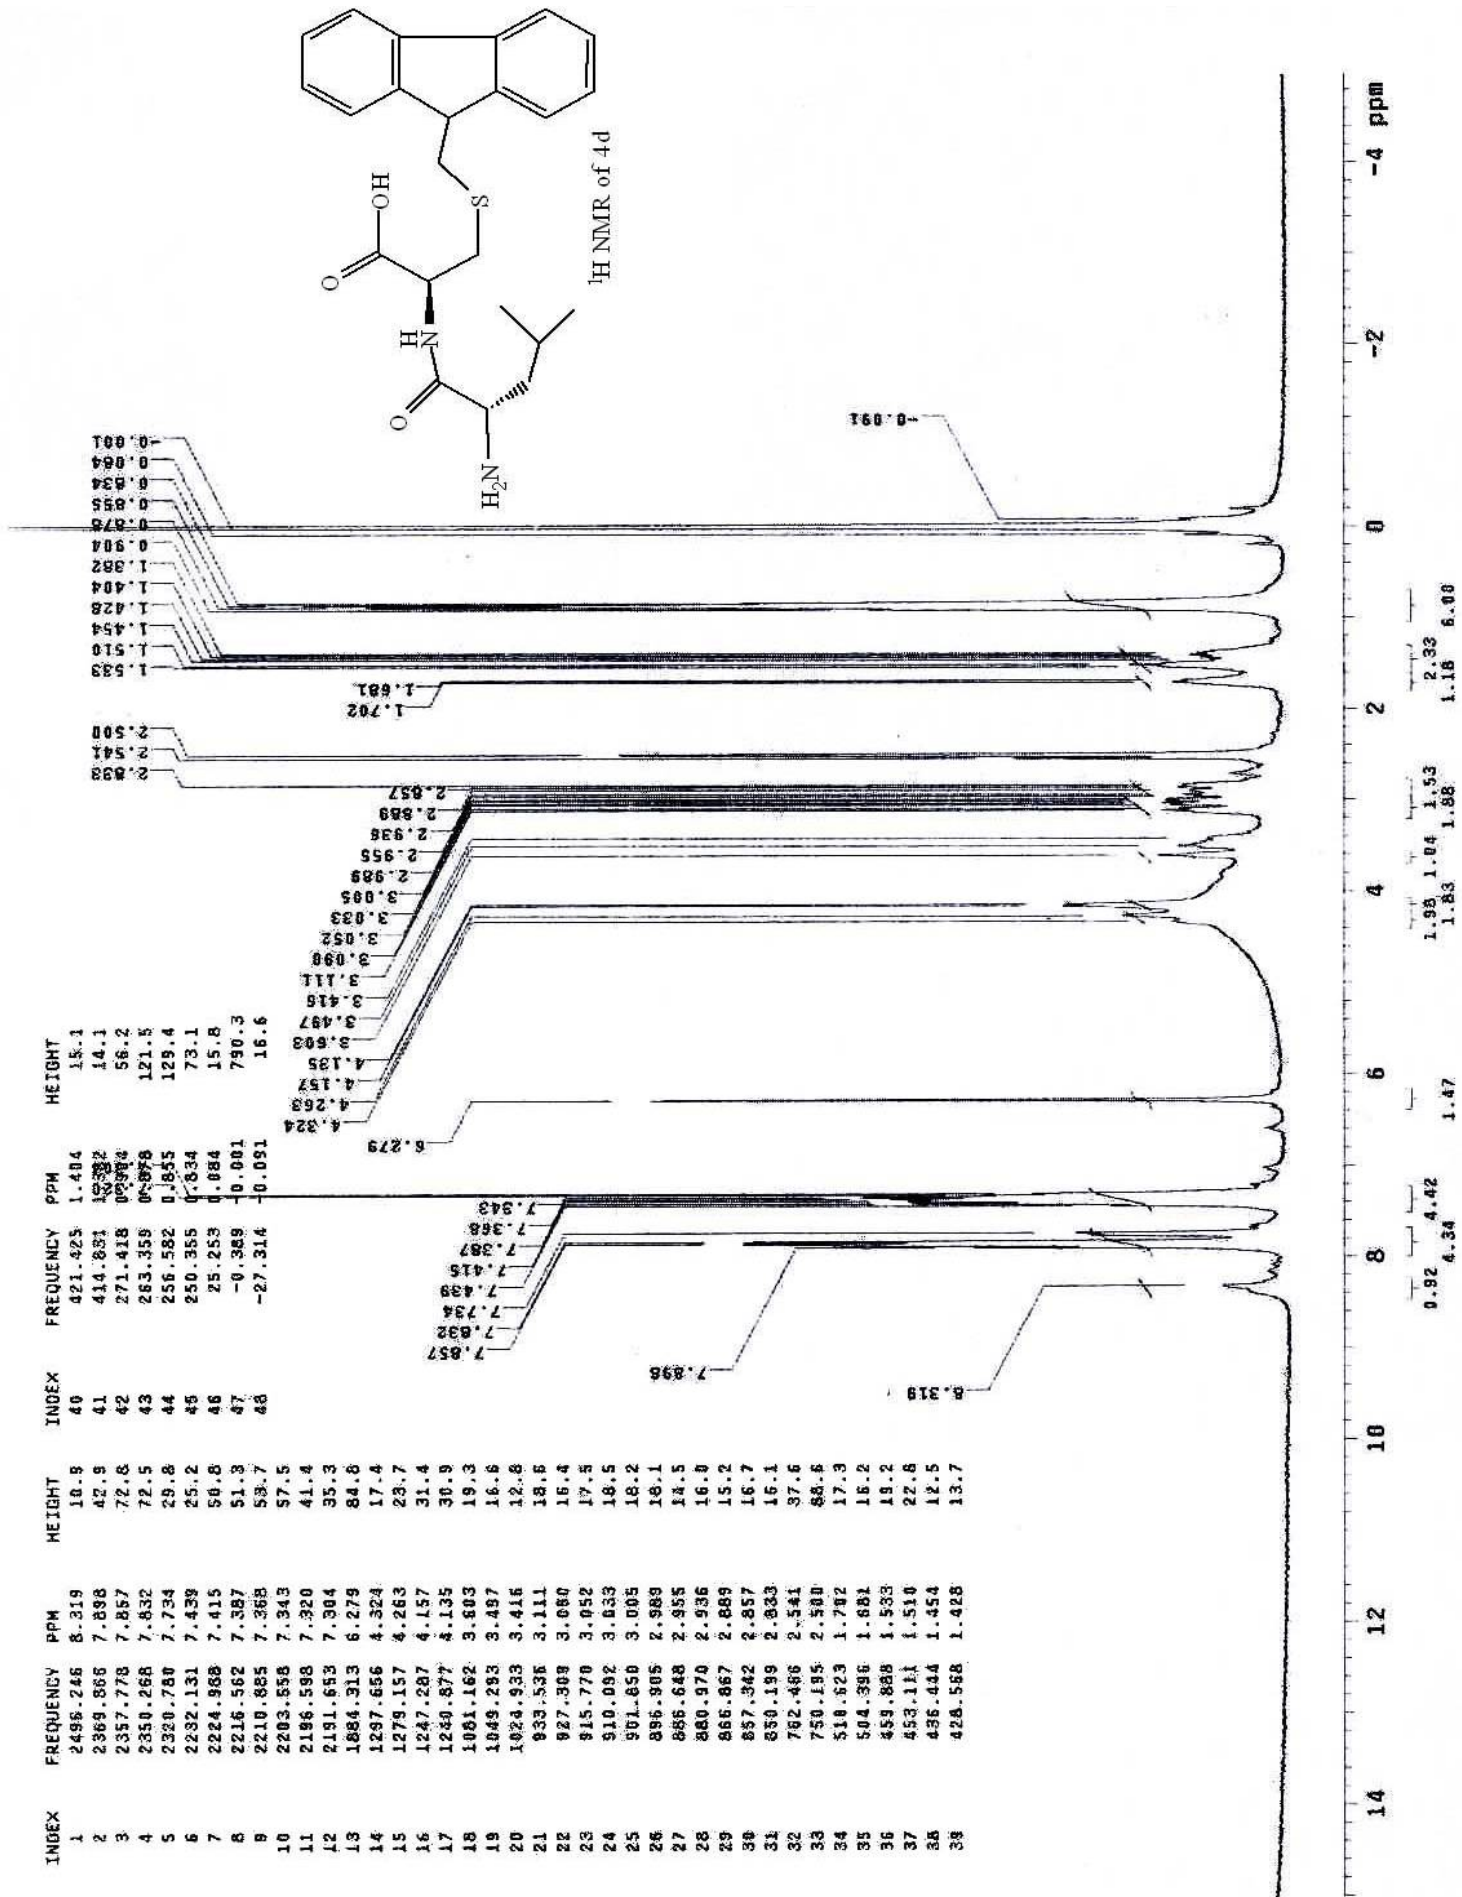



$^1\text{H-NMR}$  spectrum of **4d** in the range of 0-4.5 ppm

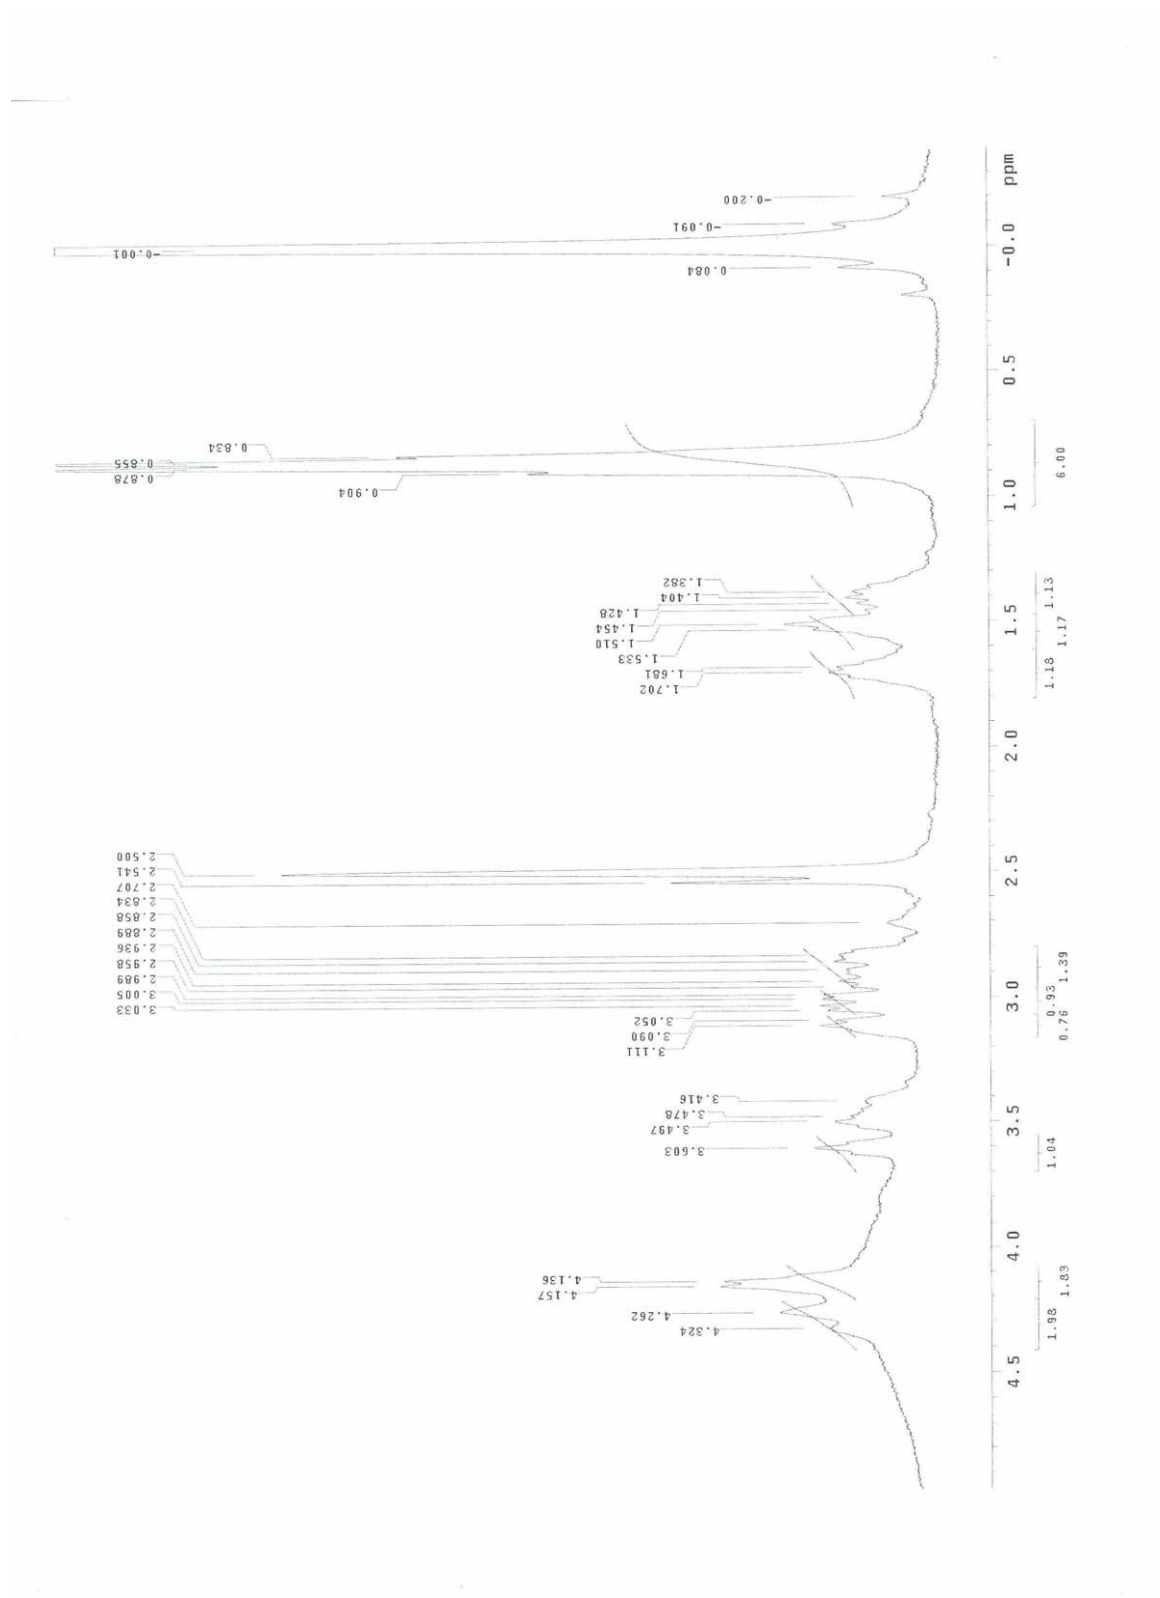

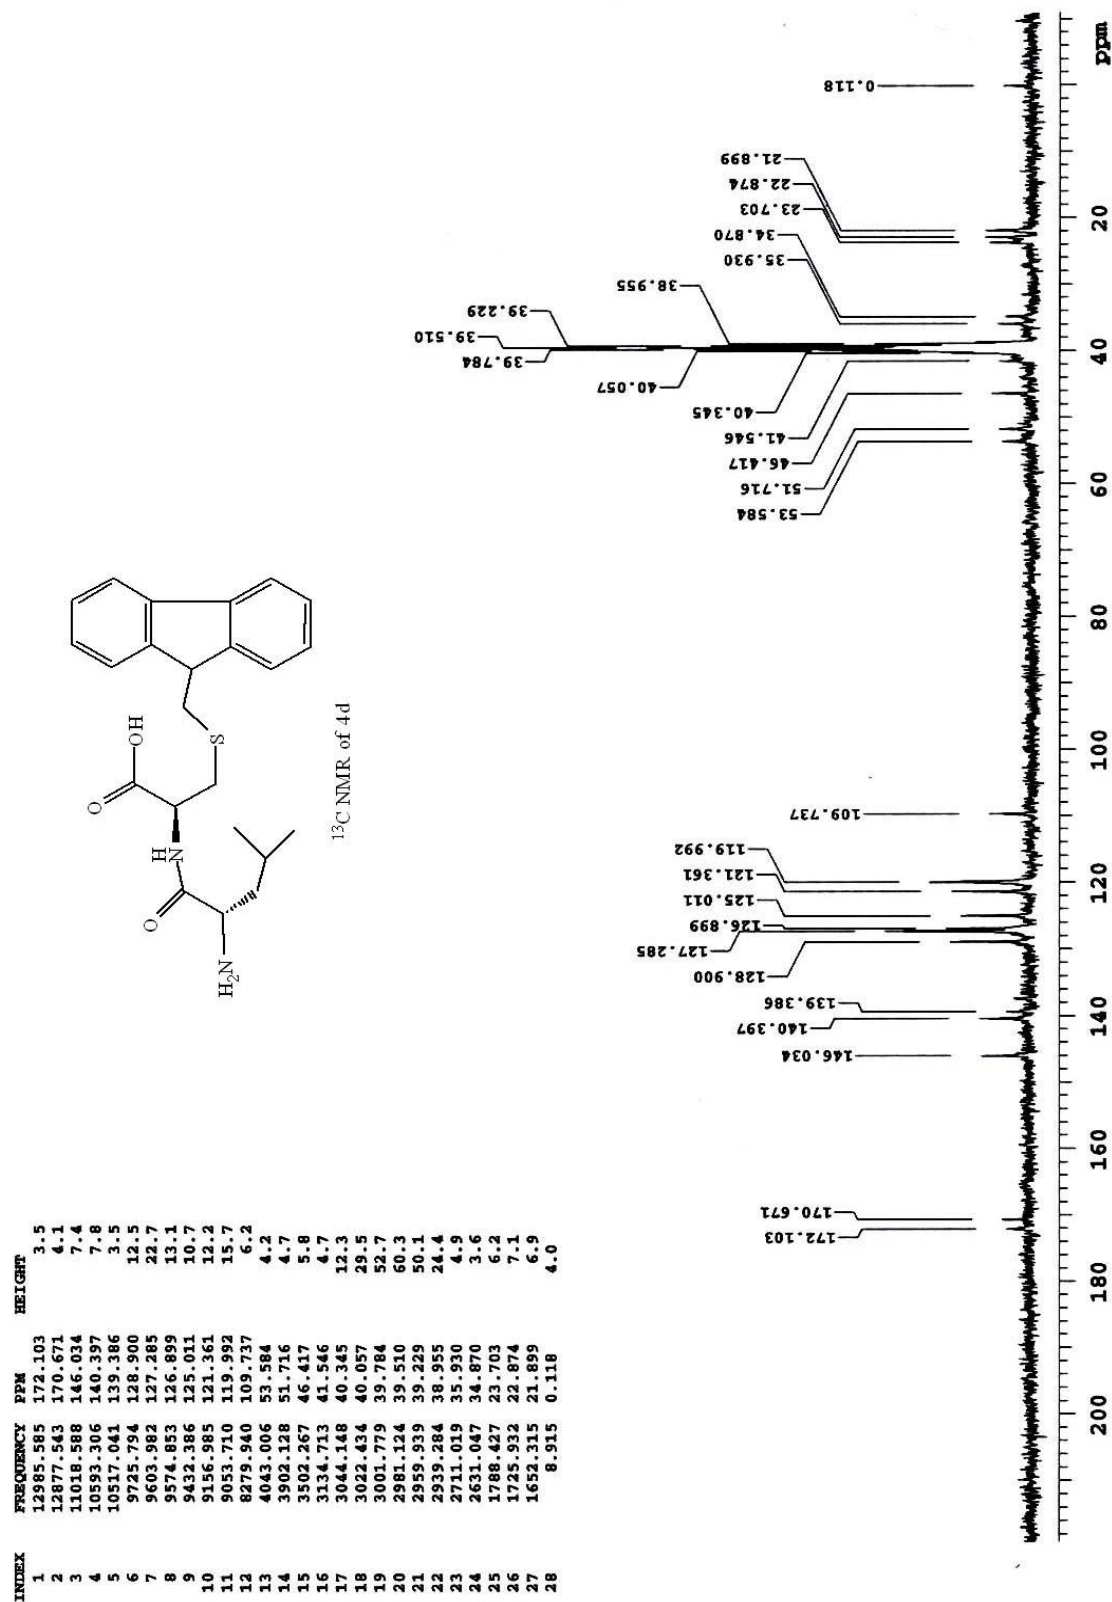

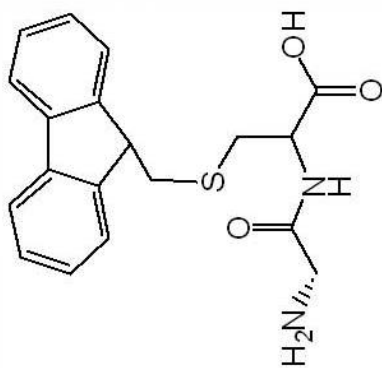

<sup>1</sup>H NMR of 4e

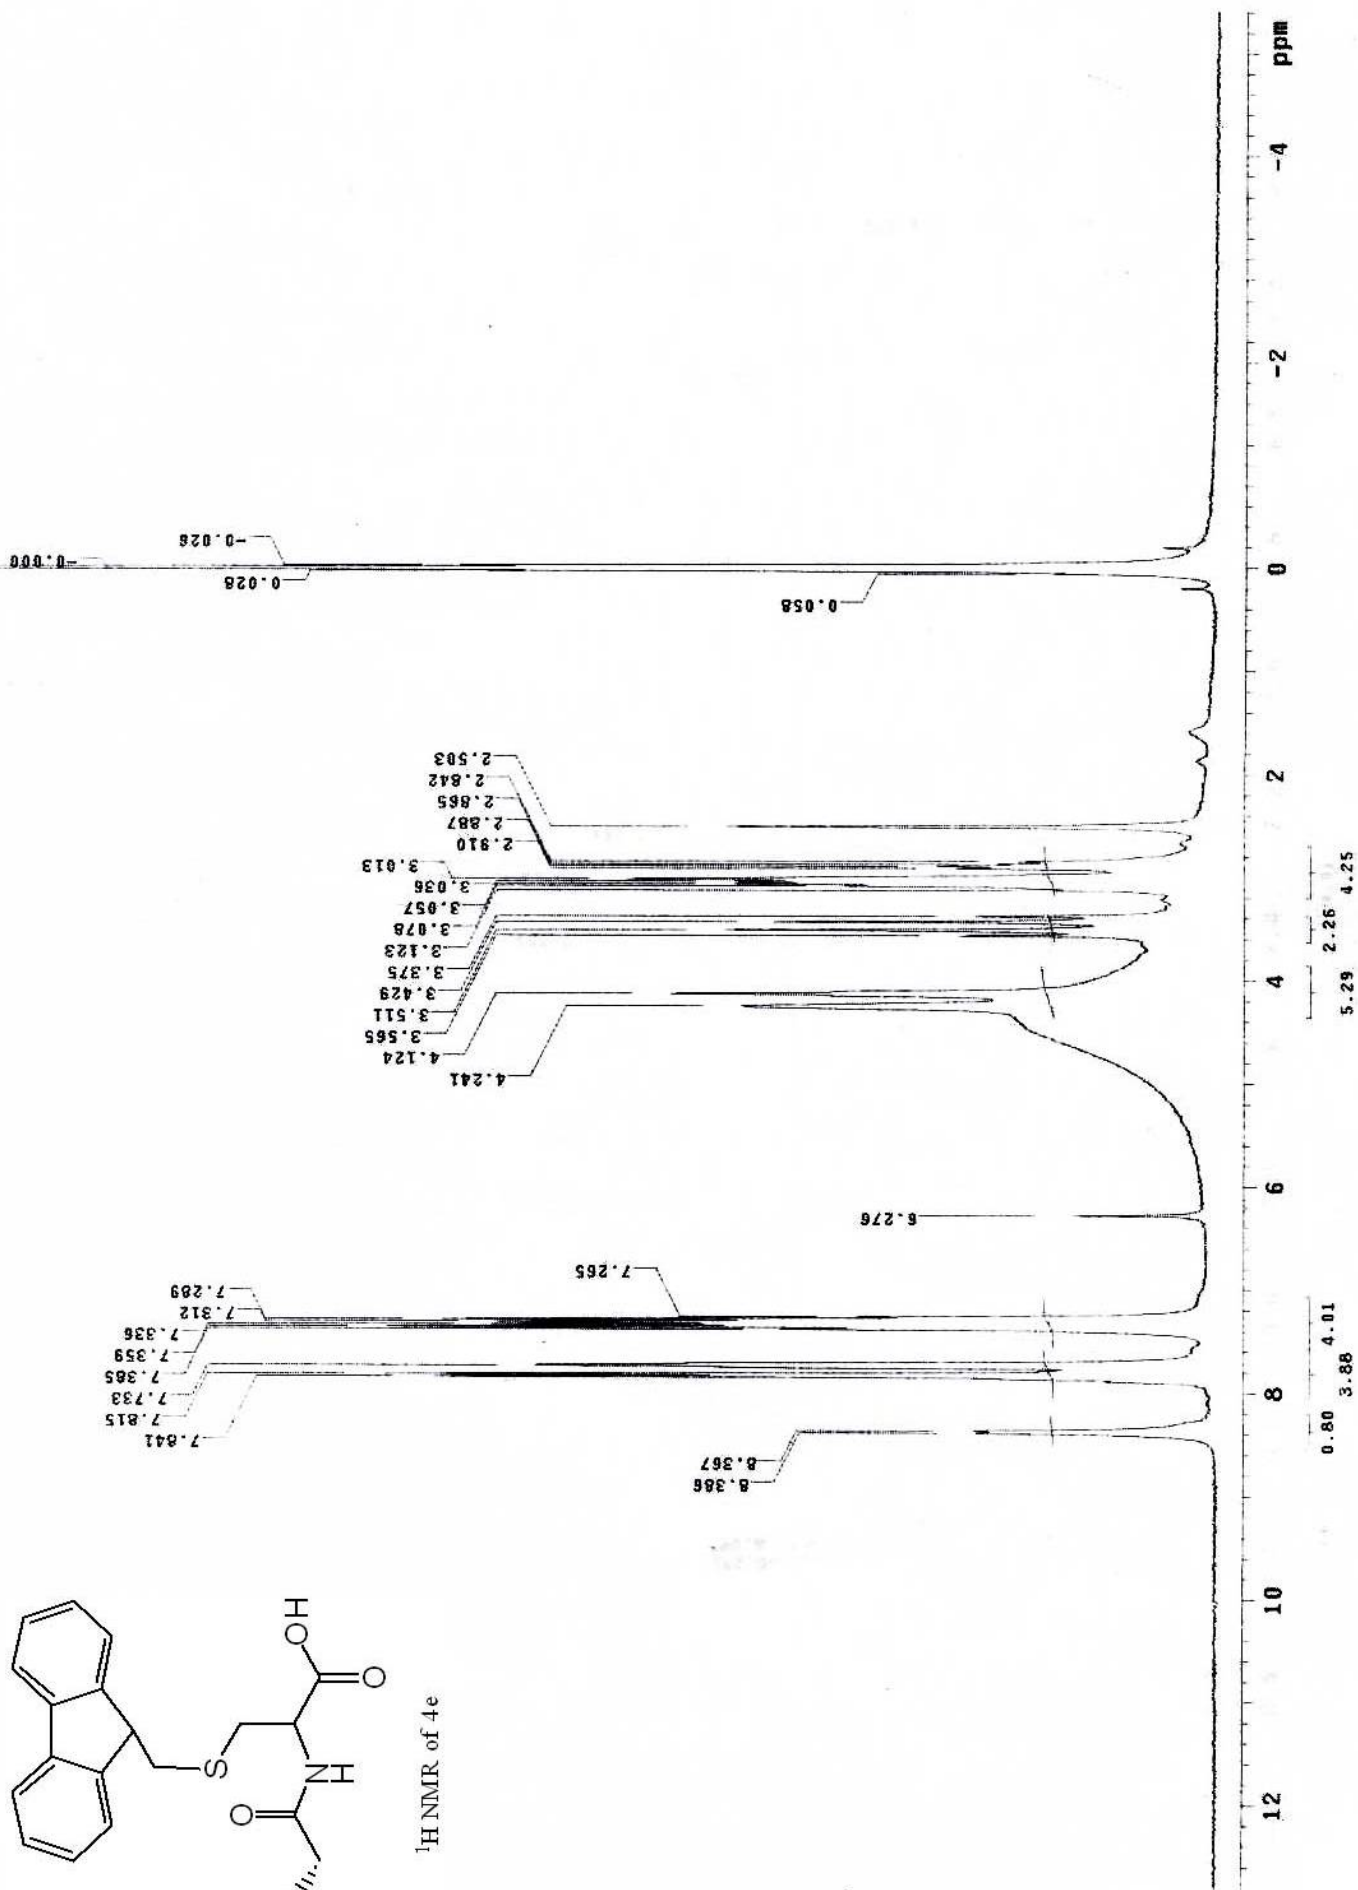

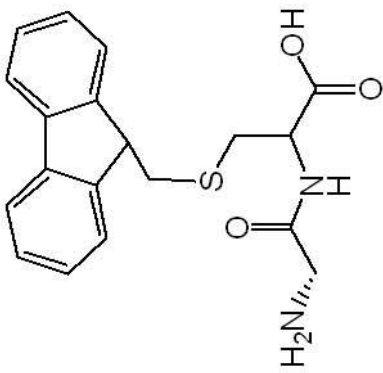

<sup>13</sup>C NMR of 4e

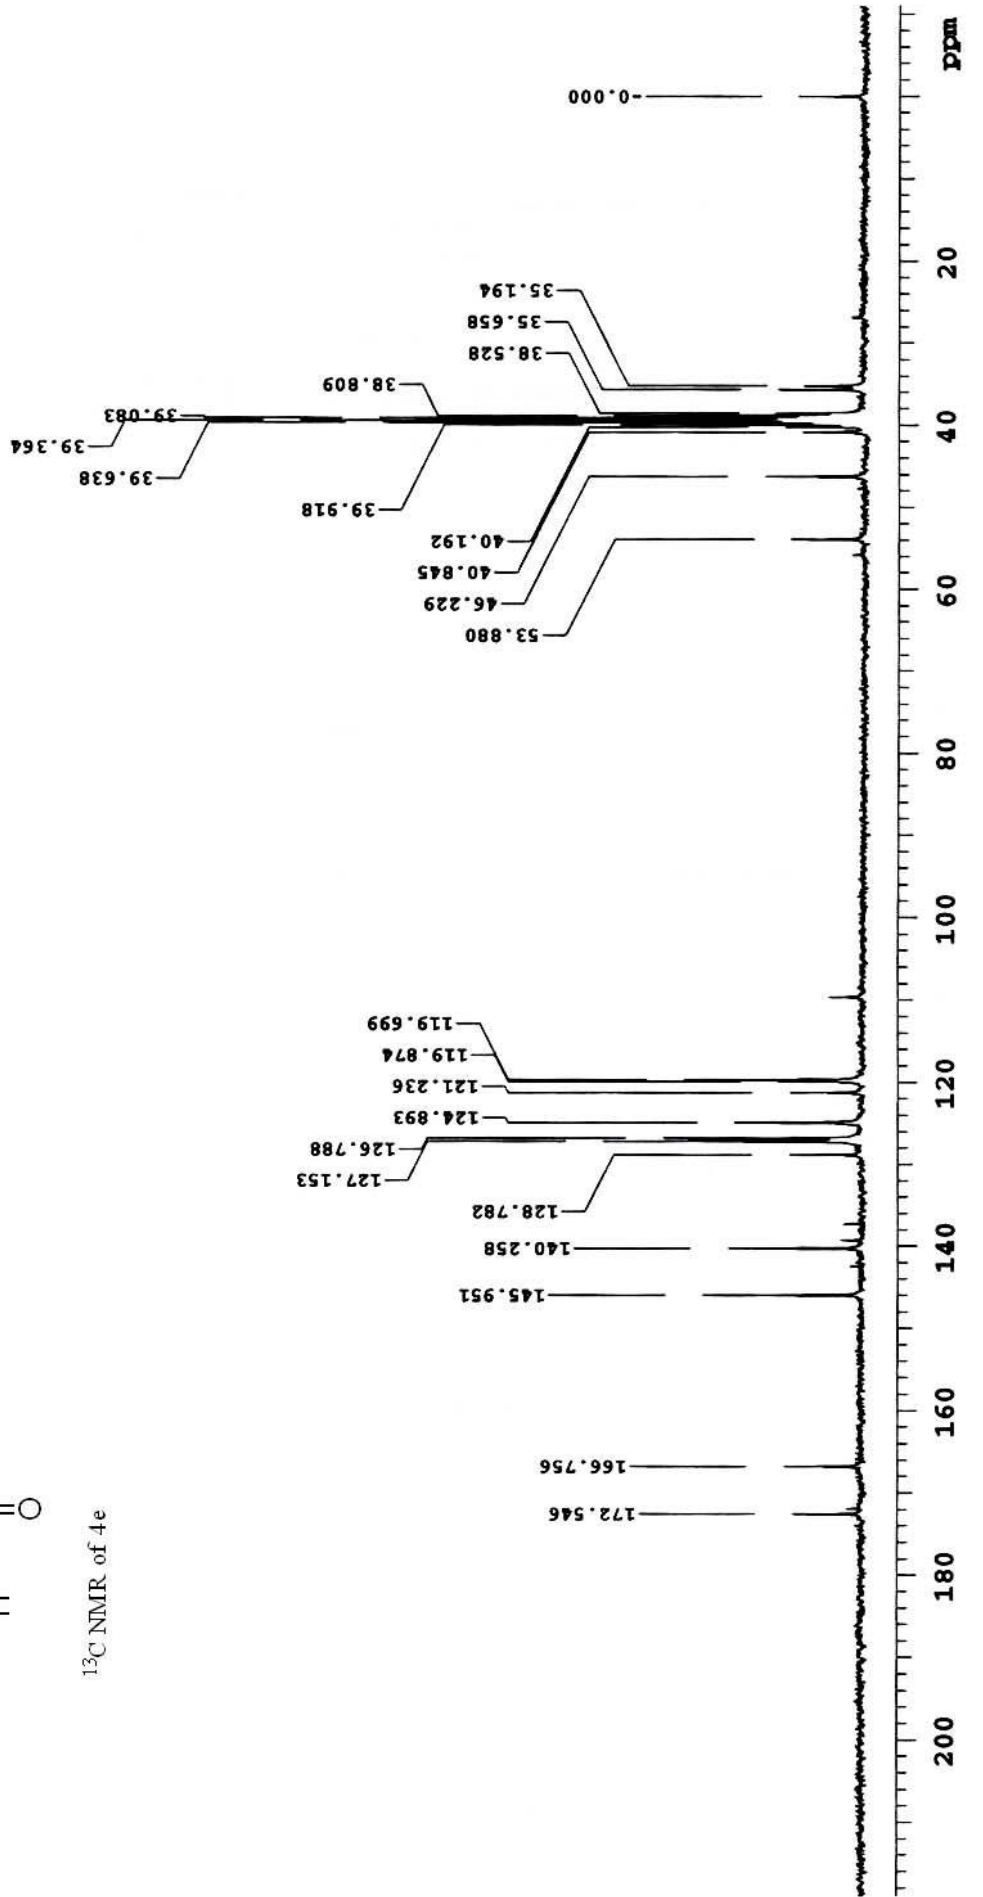

| INDEX | FREQUENCY PPM | HEIGHT |
|-------|---------------|--------|
| 1     | 2351.205      | 7.836  |
| 2     | 2326.230      | 7.752  |
| 3     | 2212.306      | 7.373  |
| 4     | 2195.072      | 7.315  |
| 5     | 2032.219      | 6.773  |
| 6     | 1884.995      | 6.282  |
| 7     | 1275.067      | 4.249  |
| 8     | 1240.305      | 4.133  |
| 9     | 1064.162      | 3.546  |
| 10    | 1057.736      | 3.525  |
| 11    | 904.815       | 3.015  |
| 12    | 860.999       | 2.869  |
| 13    | 860.560       | 2.868  |
| 14    | 860.268       | 2.867  |
| 15    | 859.976       | 2.866  |
| 16    | 750.873       | 2.502  |
| 17    | 408.664       | 1.362  |
| 18    | 20.156        | 0.067  |
| 19    | 0.000         | 0.000  |
| 20    | -16.942       | -0.056 |

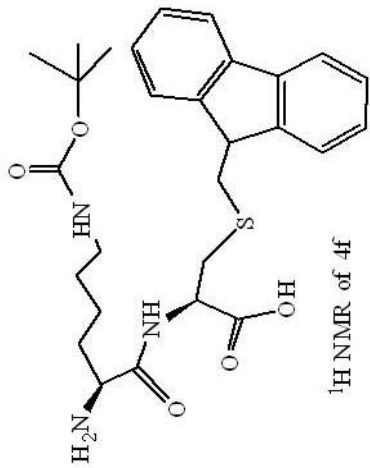

<sup>1</sup>H NMR of 4f

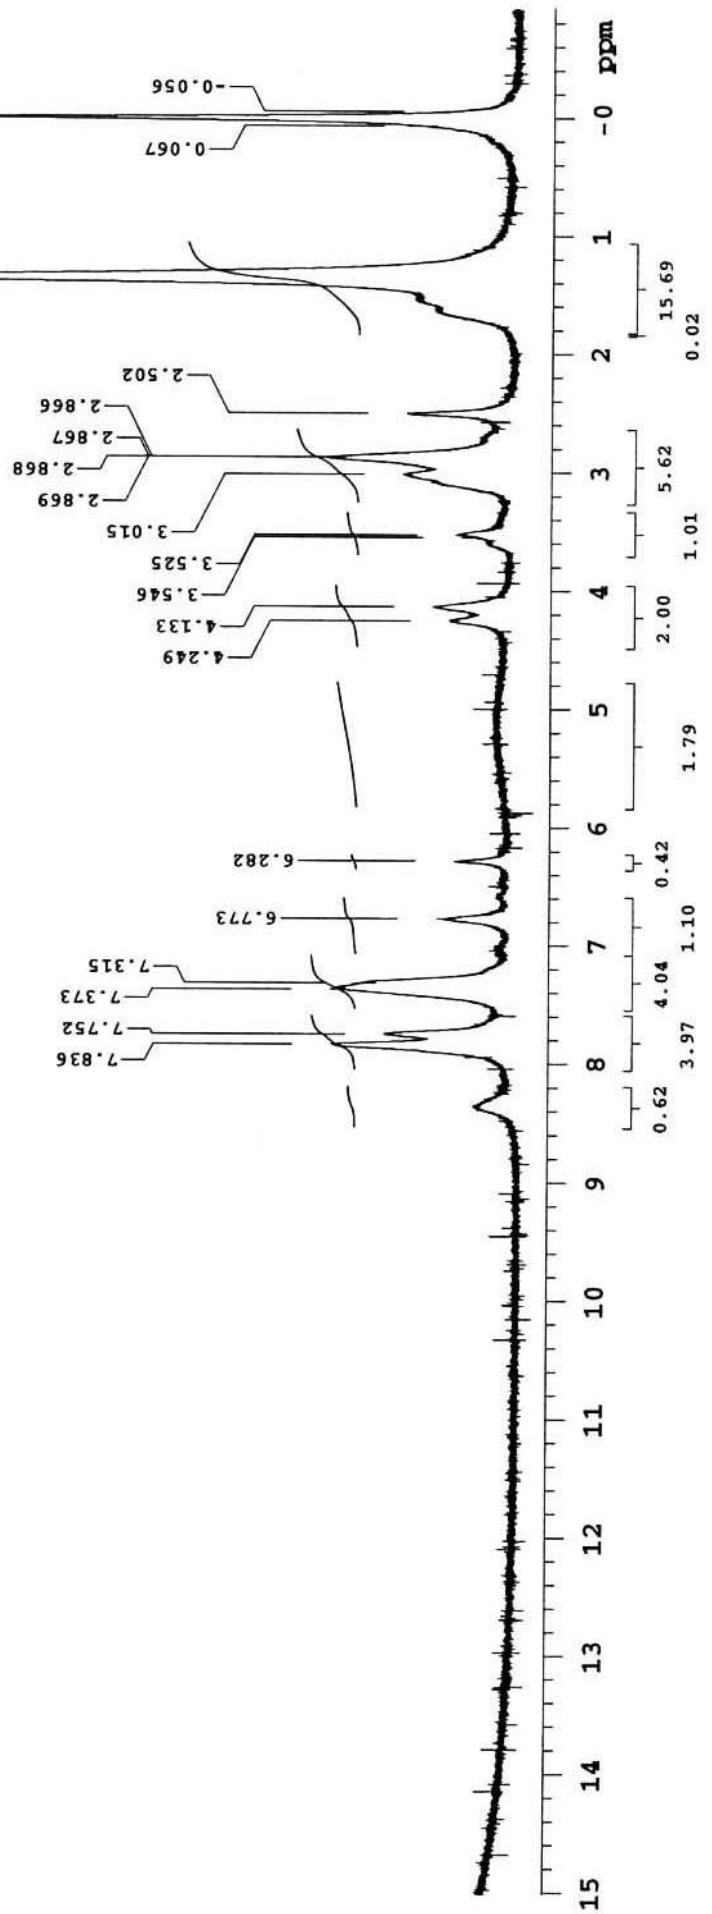

| INDEX | FREQUENCY PPM | HEIGHT  |
|-------|---------------|---------|
| 1     | 12944.804     | 171.563 |
| 2     | 12743.020     | 168.888 |
| 3     | 11750.518     | 155.734 |
| 4     | 11017.538     | 146.020 |
| 5     | 10623.493     | 140.797 |
| 6     | 9637.347      | 127.728 |
| 7     | 9603.451      | 127.278 |
| 8     | 9445.625      | 125.187 |
| 9     | 9179.228      | 121.656 |
| 10    | 9073.305      | 120.252 |
| 11    | 5868.594      | 77.779  |
| 12    | 3937.611      | 52.187  |
| 13    | 3521.332      | 46.670  |
| 14    | 3021.903      | 40.050  |
| 15    | 3001.248      | 39.777  |
| 16    | 2980.593      | 39.503  |
| 17    | 2959.938      | 39.229  |
| 18    | 2939.283      | 38.955  |
| 19    | 2723.200      | 36.092  |
| 20    | 2560.078      | 33.930  |
| 21    | 2339.227      | 31.003  |
| 22    | 2216.356      | 29.374  |
| 23    | 2155.450      | 28.567  |
| 24    | 1622.656      | 21.506  |

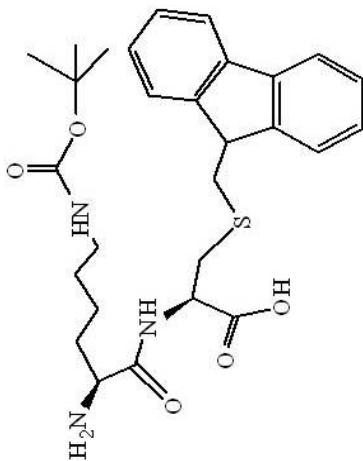

<sup>13</sup>C NMR of 4f

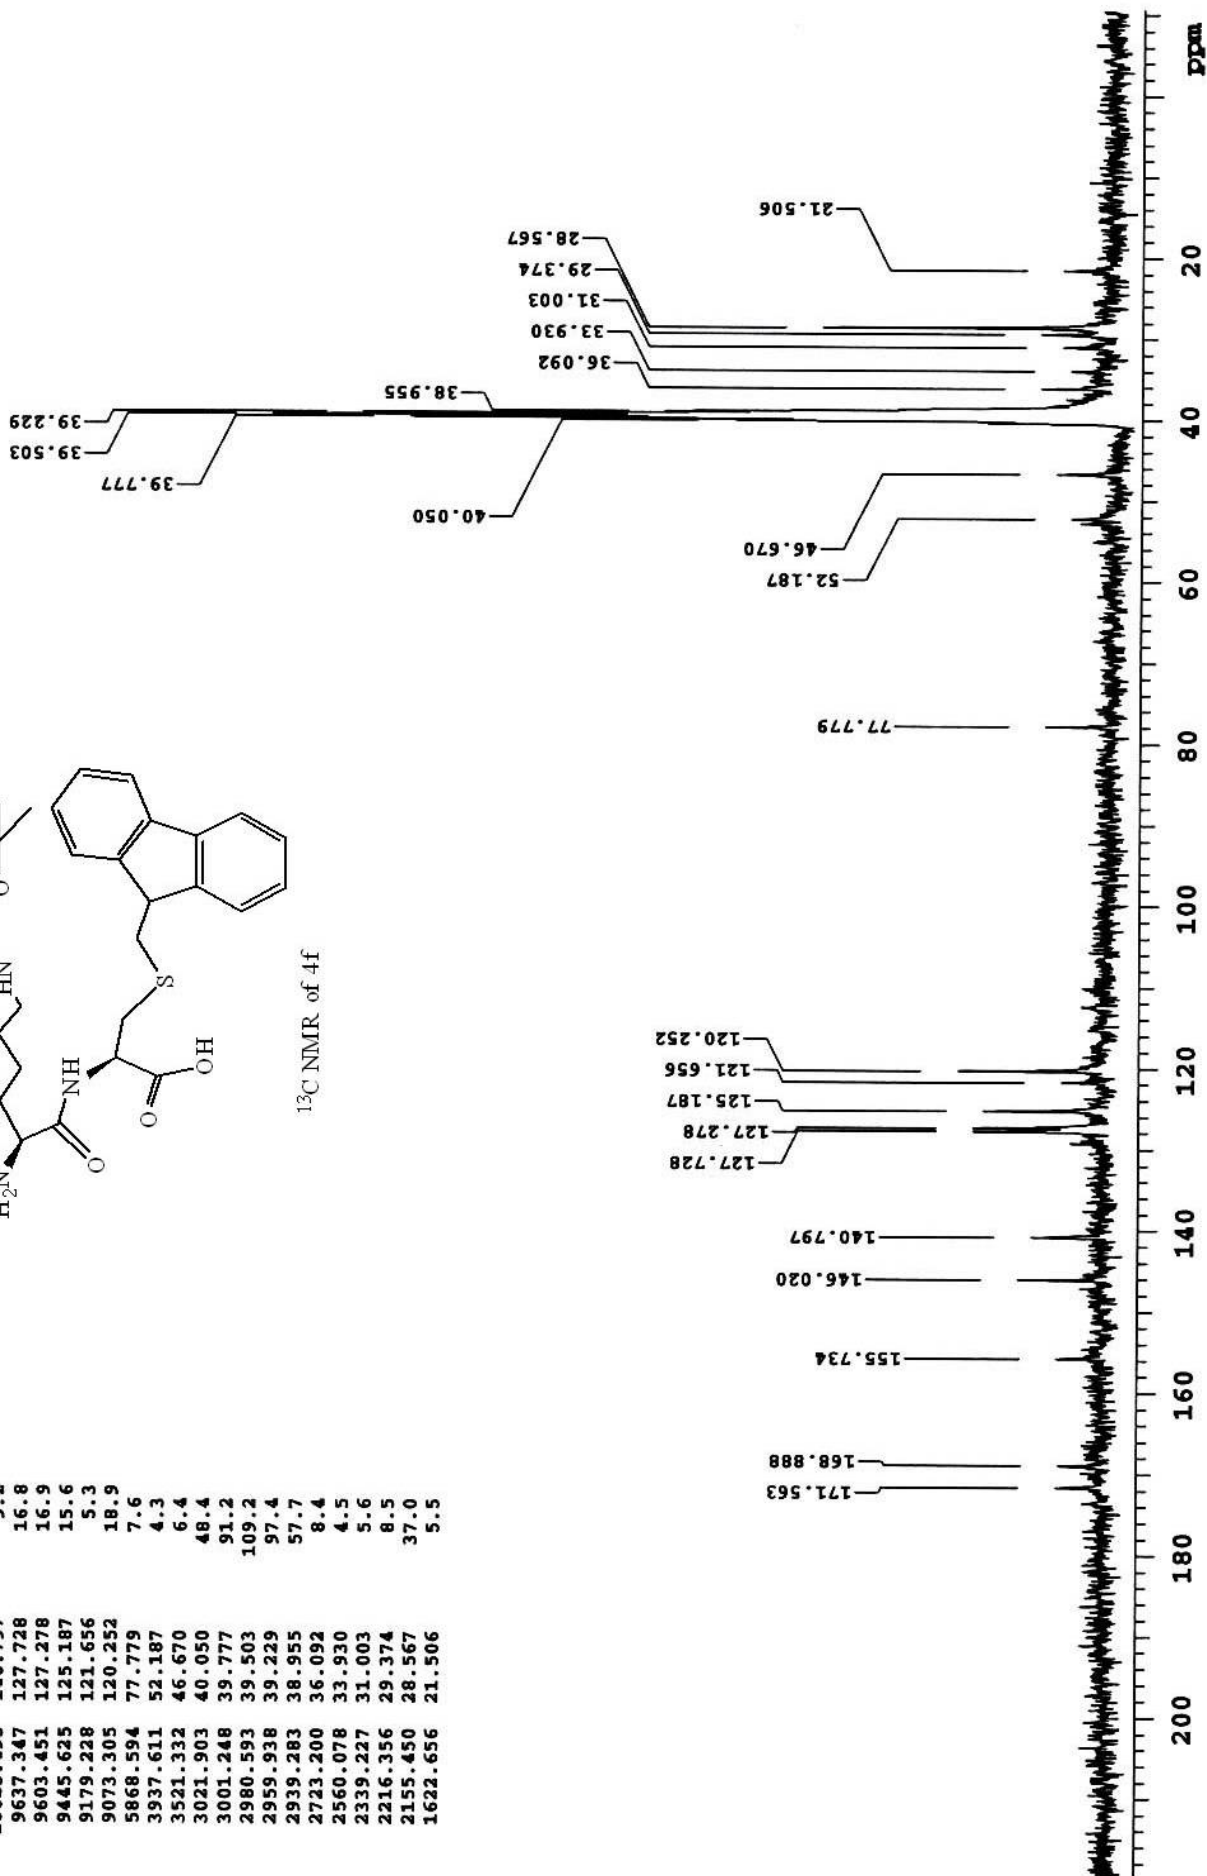

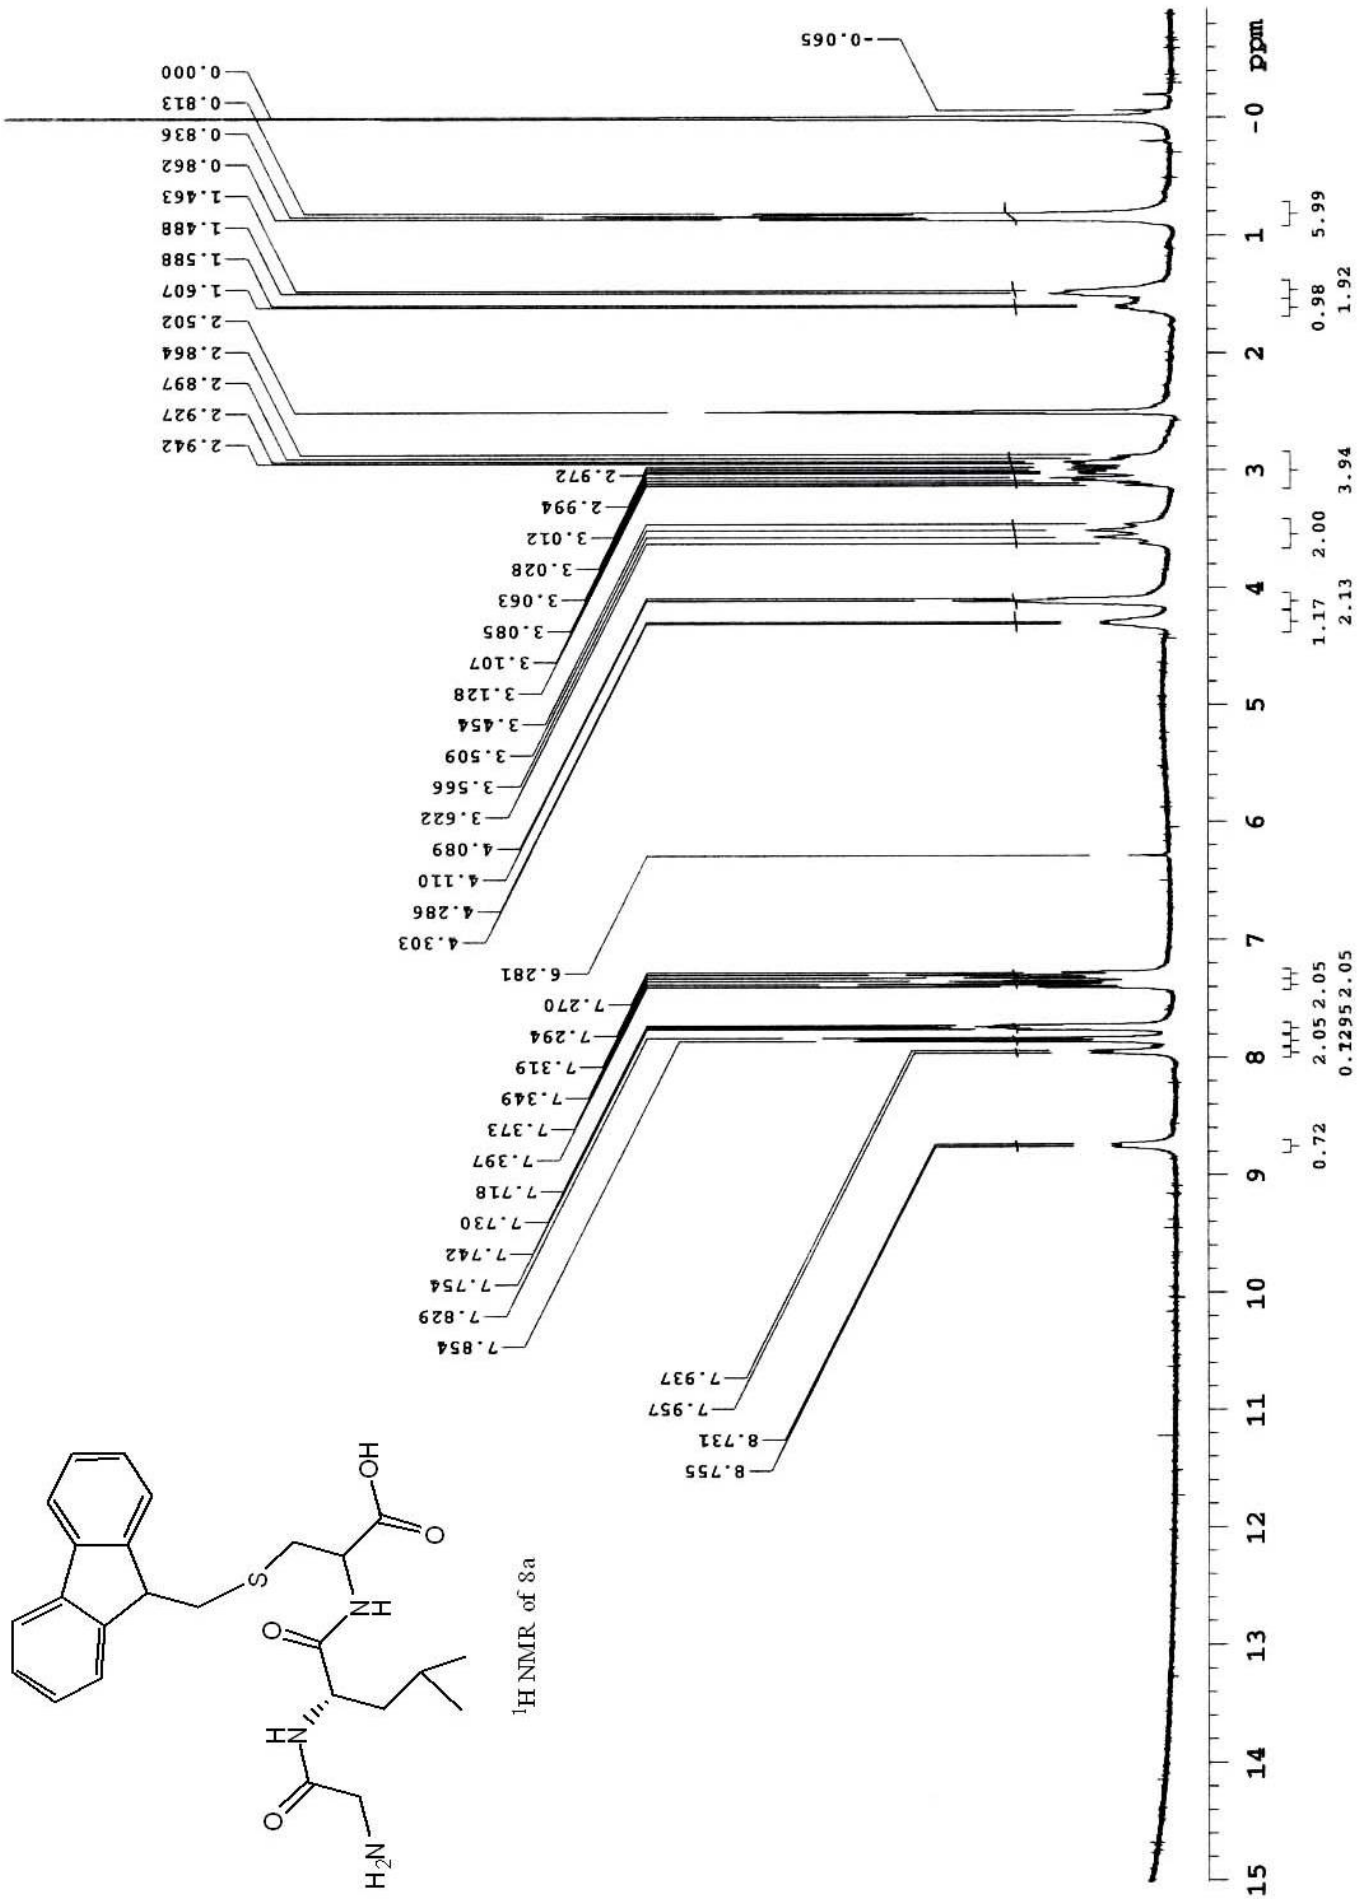







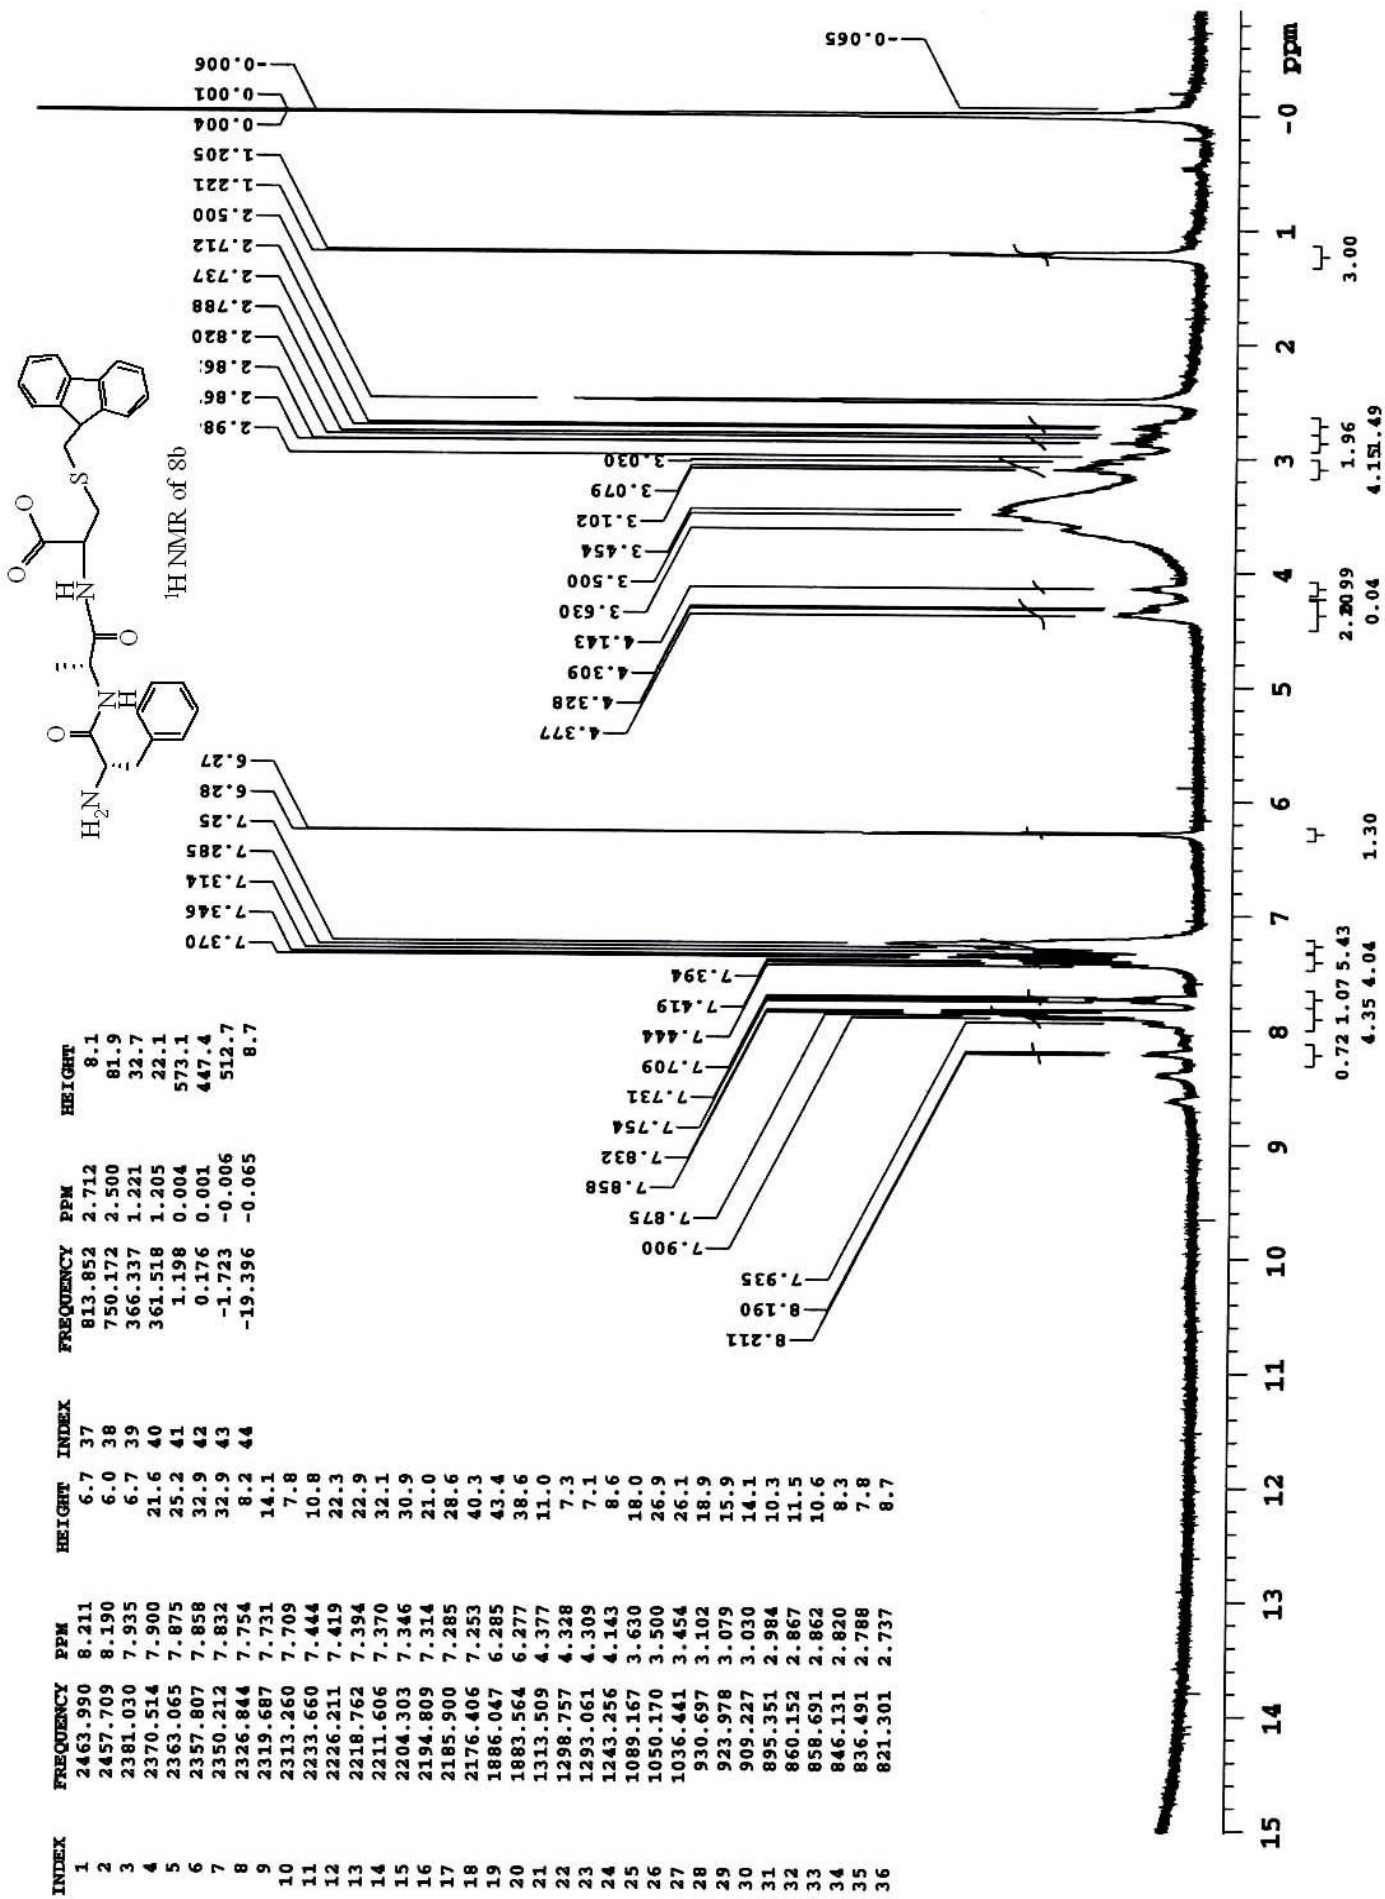

| INDEX | FREQUENCY | PPM     | HEIGHT |
|-------|-----------|---------|--------|
| 1     | 12961.222 | 171.780 | 10.4   |
| 2     | 12638.686 | 167.505 | 4.7    |
| 3     | 11006.407 | 145.872 | 9.9    |
| 4     | 10607.076 | 140.580 | 9.6    |
| 5     | 10174.908 | 134.852 | 6.4    |
| 6     | 9780.873  | 129.630 | 17.5   |
| 7     | 9700.901  | 128.570 | 17.8   |
| 8     | 9613.515  | 127.412 | 21.4   |
| 9     | 9587.034  | 127.061 | 24.9   |
| 10    | 9430.267  | 124.983 | 16.3   |
| 11    | 9165.459  | 121.473 | 5.3    |
| 12    | 9056.887  | 120.034 | 20.6   |
| 13    | 4013.876  | 53.197  | 5.1    |
| 14    | 3943.437  | 52.264  | 4.7    |
| 15    | 3636.259  | 48.193  | 4.3    |
| 16    | 3509.151  | 46.508  | 5.6    |
| 17    | 3001.249  | 39.777  | 165.9  |
| 18    | 2980.594  | 39.503  | 191.3  |
| 19    | 2960.468  | 39.236  | 165.9  |
| 20    | 2789.932  | 36.976  | 7.0    |
| 21    | 2704.664  | 35.846  | 6.6    |
| 22    | 2561.137  | 33.944  | 4.4    |
| 23    | 1408.162  | 18.663  | 6.9    |

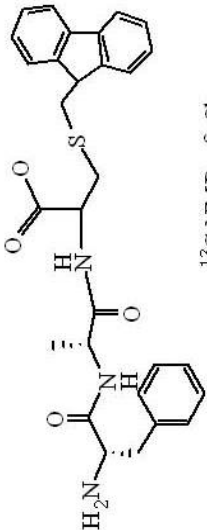

<sup>13</sup>C NMR of 8b

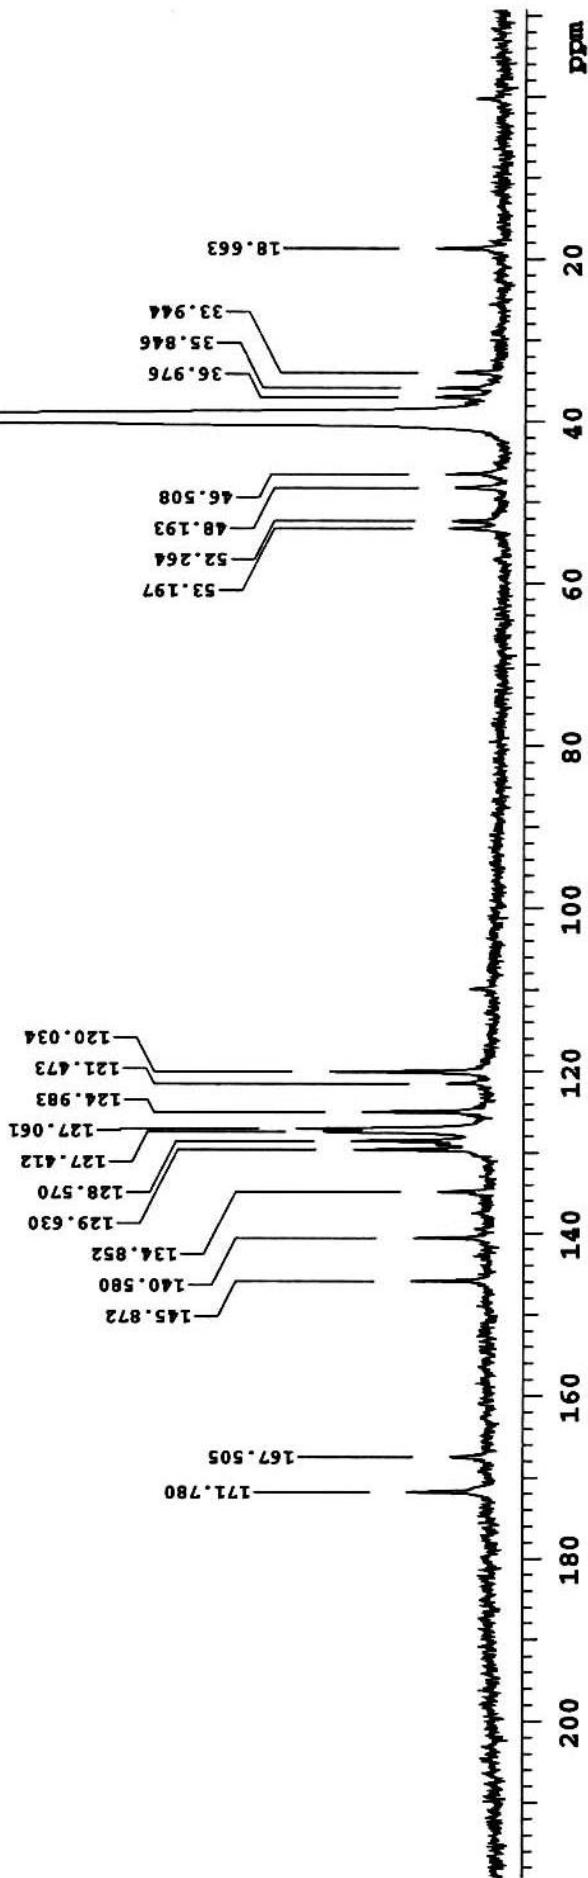

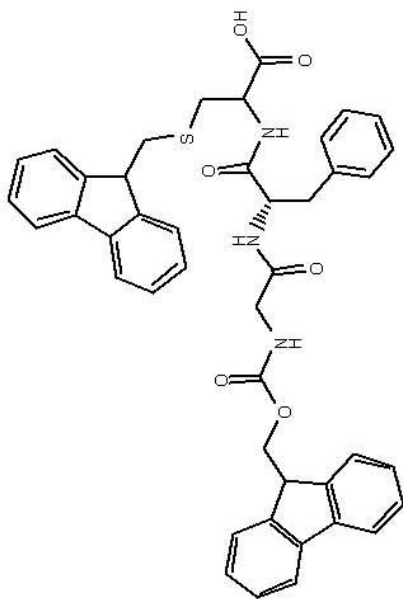

<sup>1</sup>H NMR of 9a

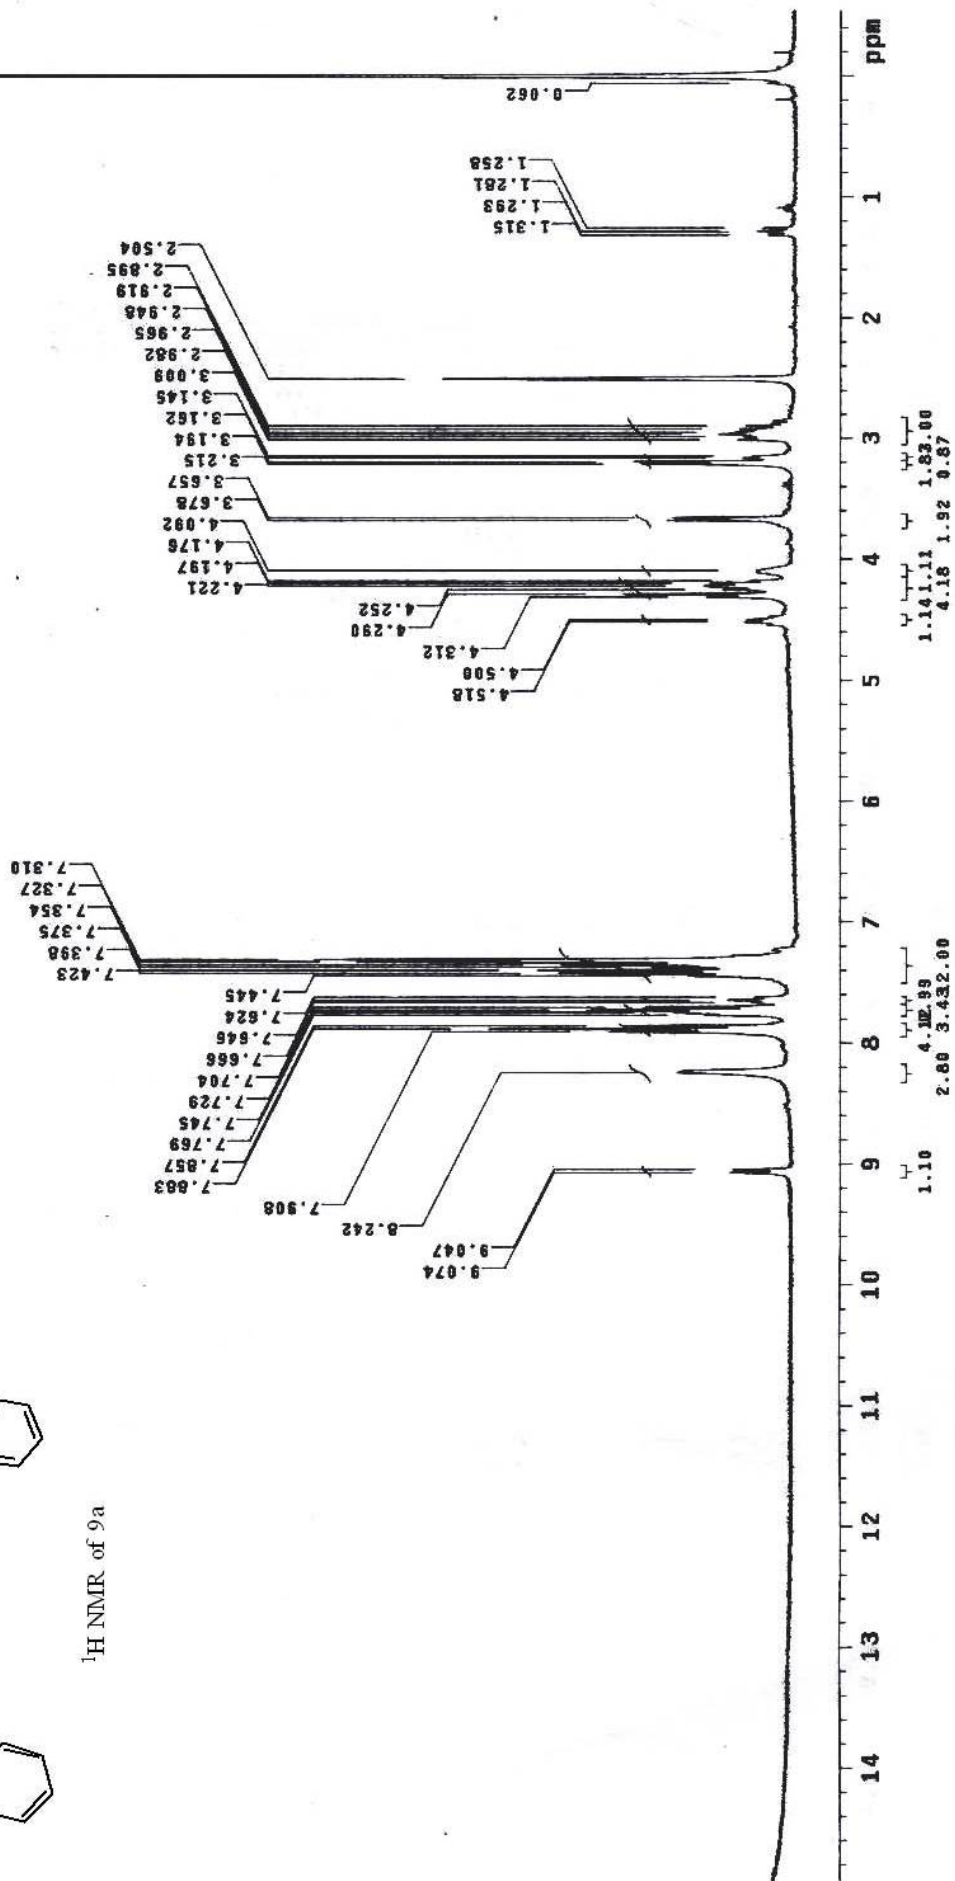



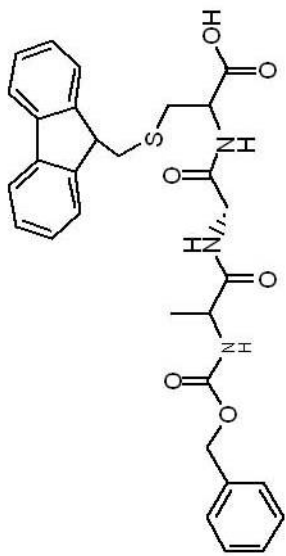

<sup>1</sup>H NMR of 9b

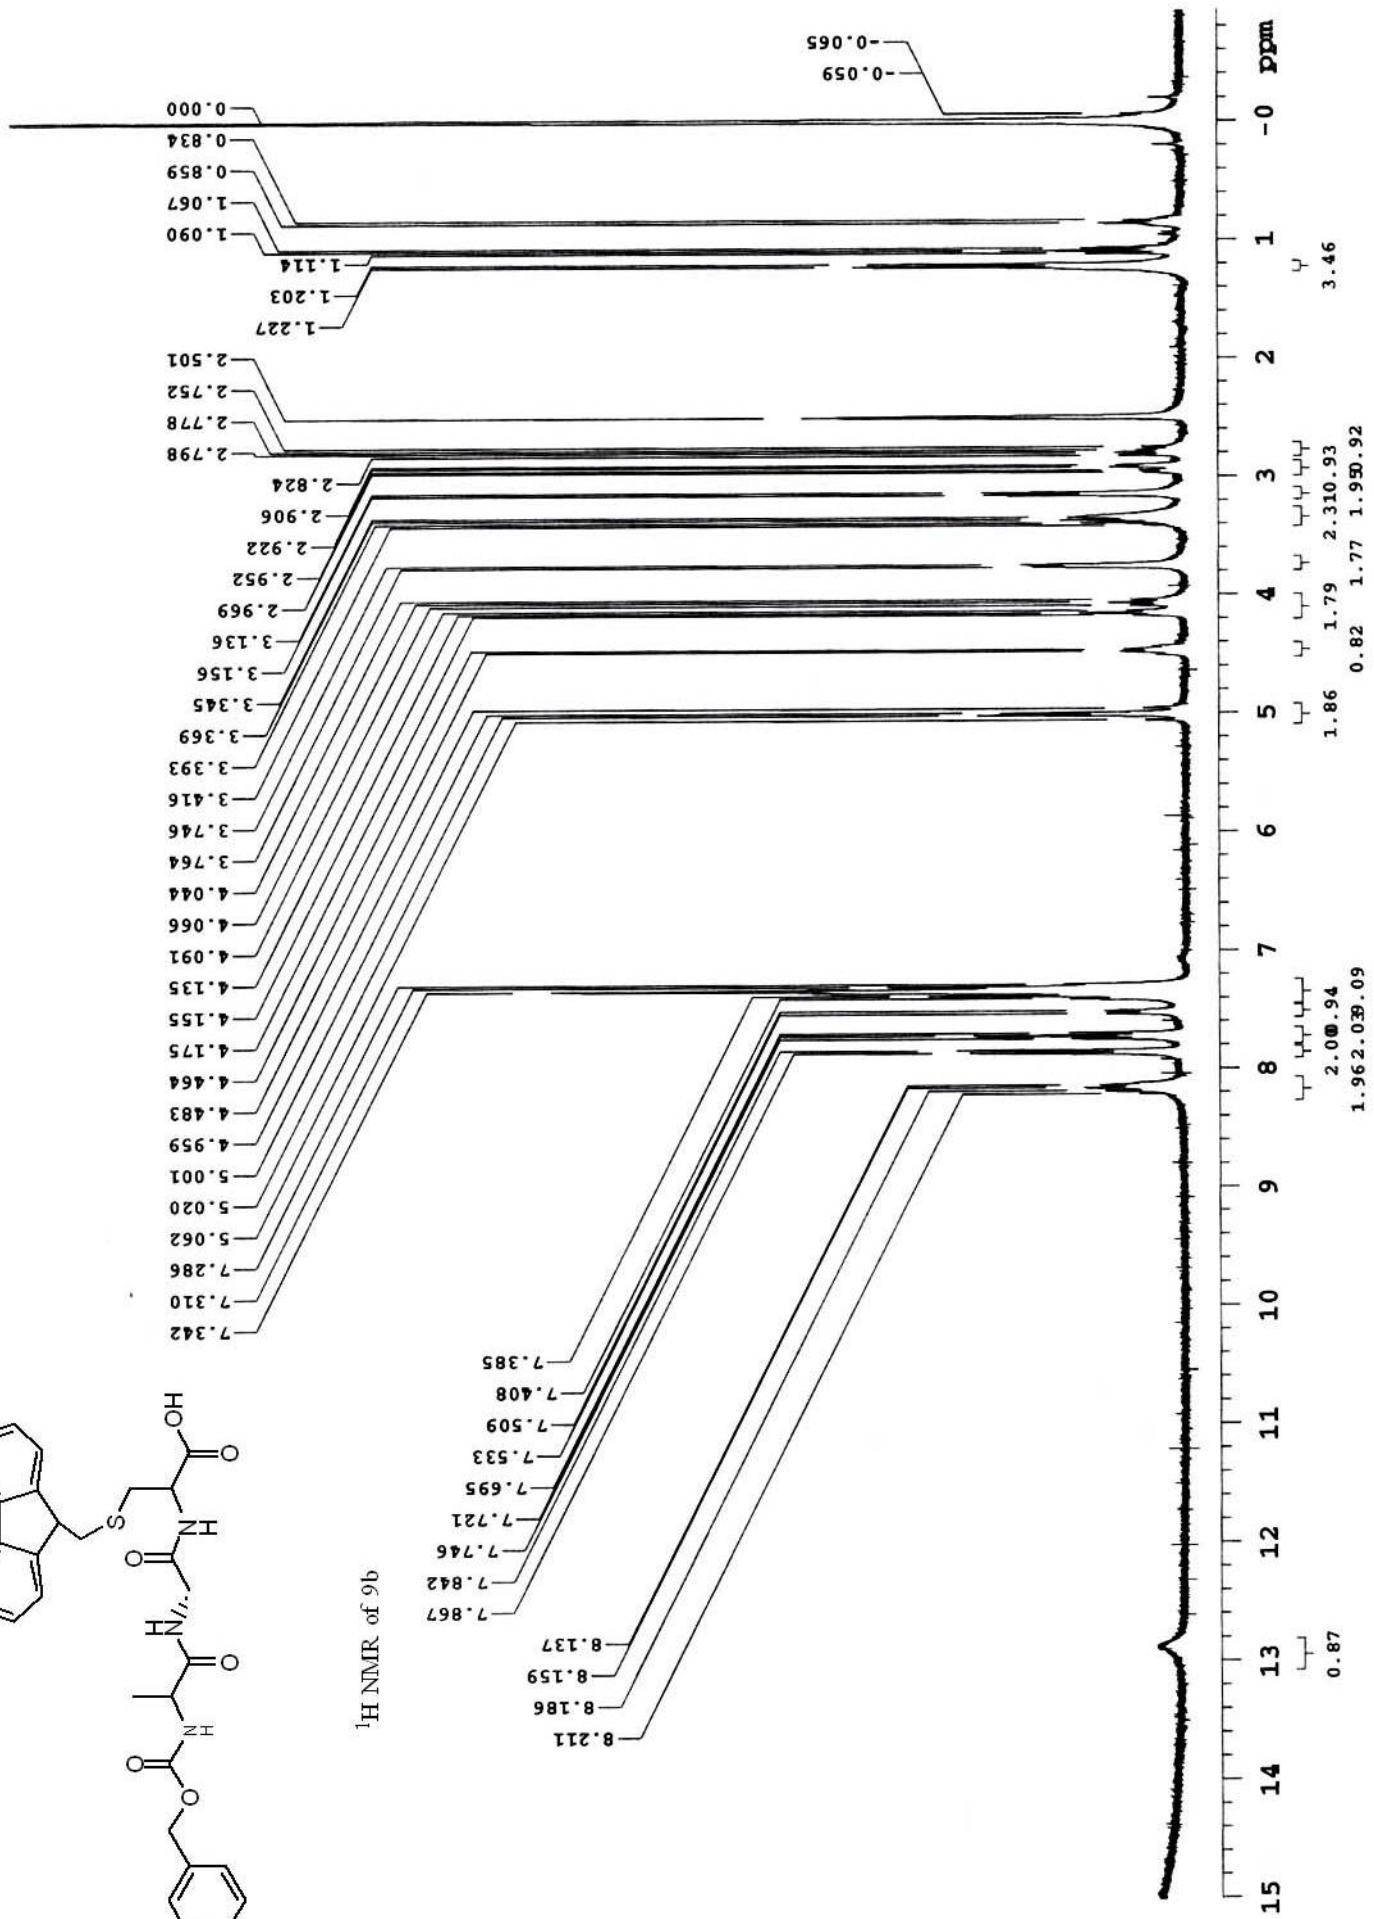



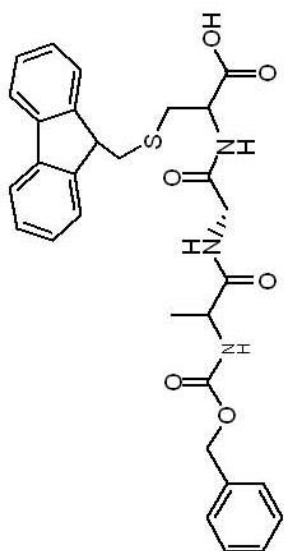

$^{13}\text{C}$  NMR of 9b

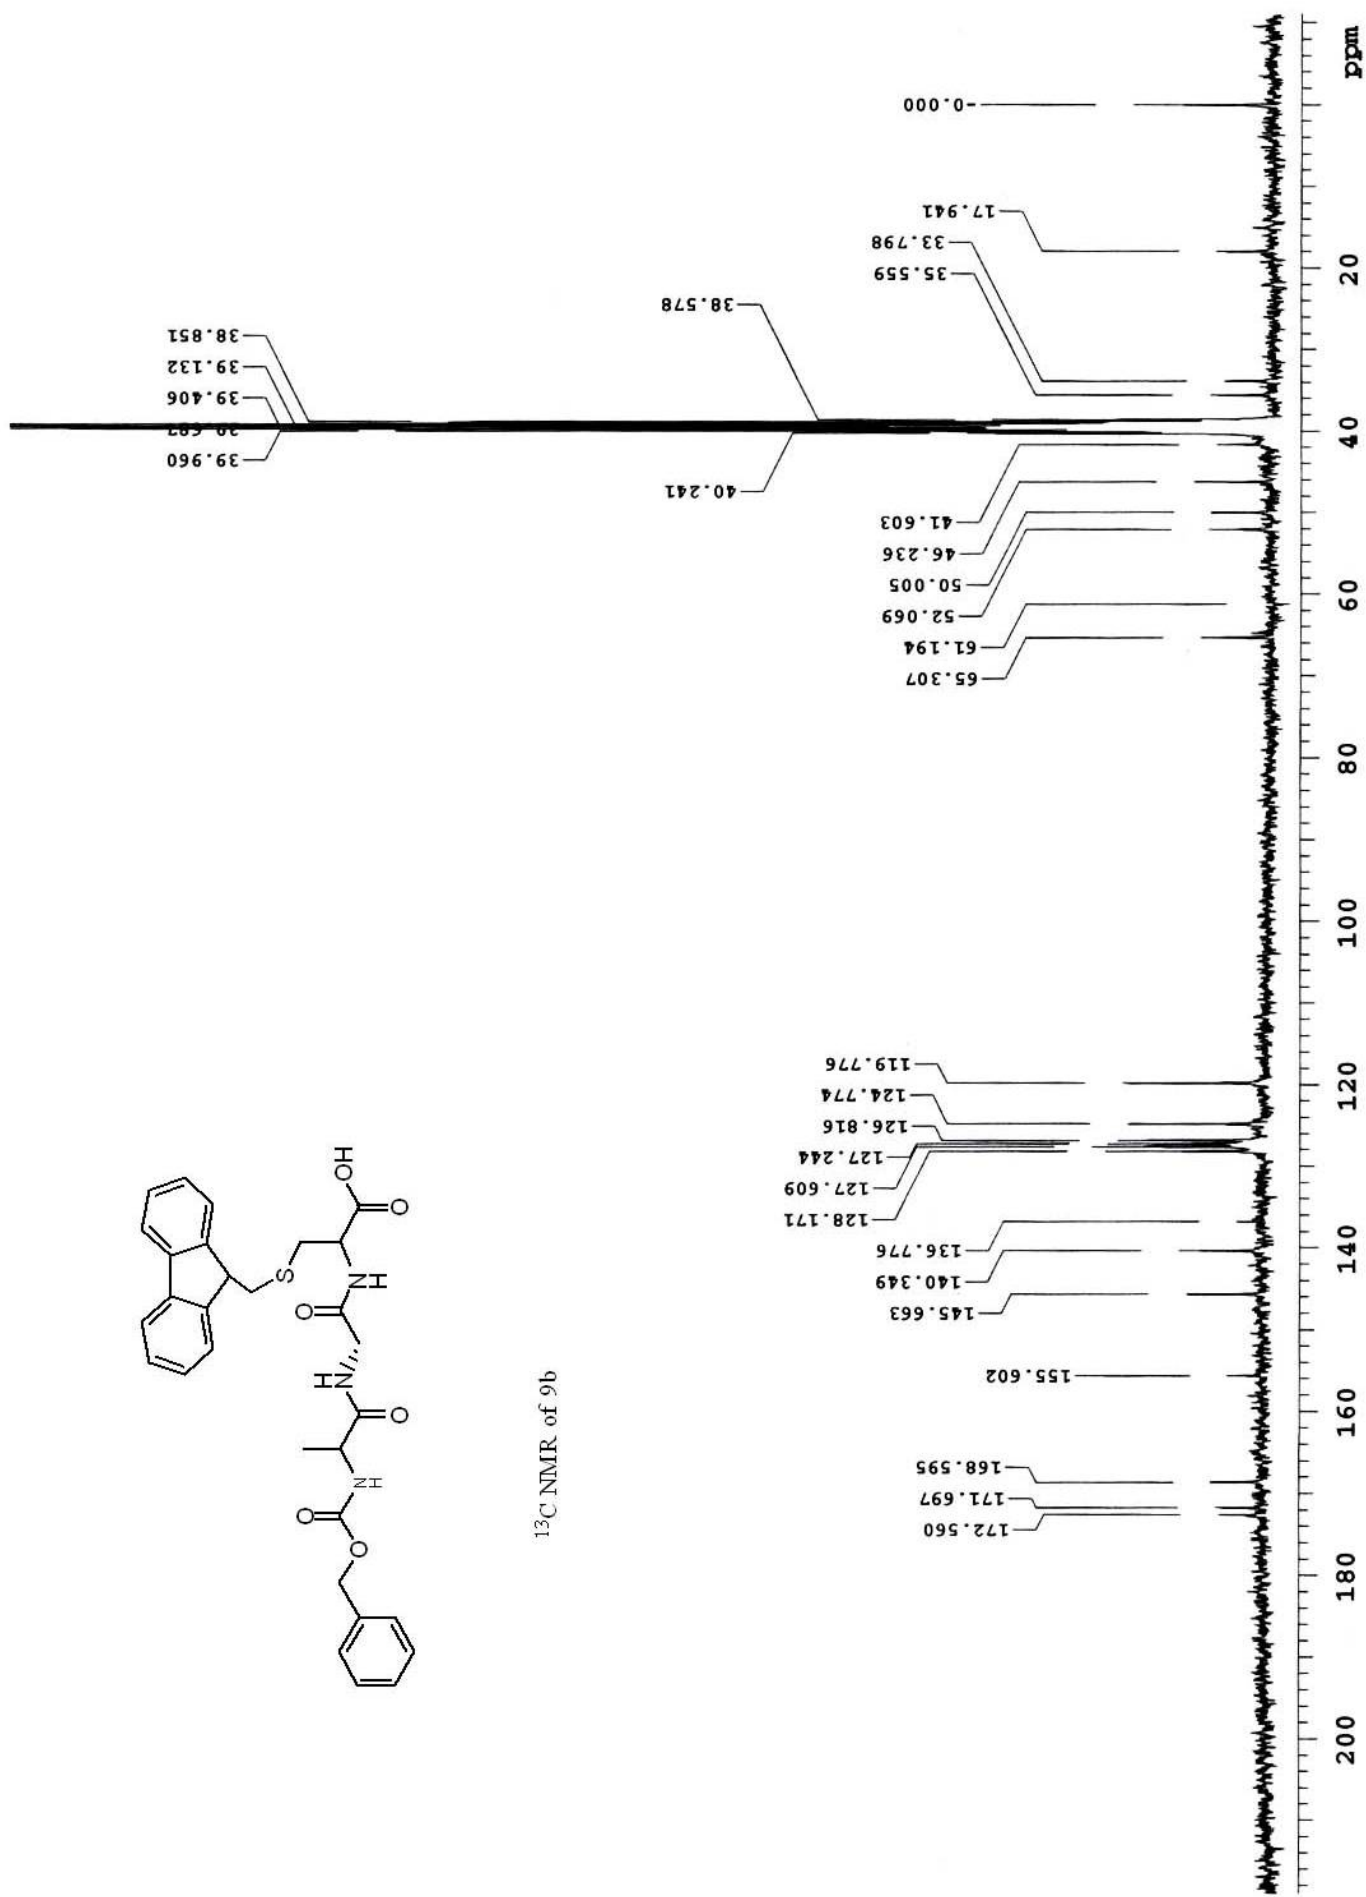

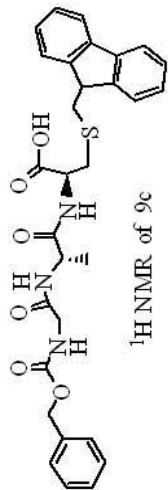

<sup>1</sup>H NMR of 9c

| INDEX | FREQUENCY PPM | HEIGHT | INDEX | FREQUENCY PPM | HEIGHT |
|-------|---------------|--------|-------|---------------|--------|
| 1     | 2505.002      | 8.348  | 37    | 410.855       | 1.369  |
| 2     | 2497.553      | 8.323  | 38    | 368.791       | 1.229  |
| 3     | 2413.863      | 8.044  | 39    | 362.364       | 1.208  |
| 4     | 2406.268      | 8.019  | 40    | -0.146        | -0.000 |
| 5     | 2367.125      | 7.889  |       |               |        |
| 6     | 2359.384      | 7.863  |       |               |        |
| 7     | 2352.374      | 7.839  |       |               |        |
| 8     | 2325.645      | 7.750  |       |               |        |
| 9     | 2319.949      | 7.731  |       |               |        |
| 10    | 2312.793      | 7.708  |       |               |        |
| 11    | 2243.270      | 7.476  |       |               |        |
| 12    | 2220.047      | 7.398  |       |               |        |
| 13    | 2214.789      | 7.381  |       |               |        |
| 14    | 2202.520      | 7.340  |       |               |        |
| 15    | 2194.049      | 7.312  |       |               |        |
| 16    | 1535.630      | 5.118  |       |               |        |
| 17    | 1508.610      | 5.028  |       |               |        |
| 18    | 1334.949      | 4.449  |       |               |        |
| 19    | 1329.983      | 4.432  |       |               |        |
| 20    | 1322.681      | 4.408  |       |               |        |
| 21    | 1256.956      | 4.189  |       |               |        |
| 22    | 1250.675      | 4.168  |       |               |        |
| 23    | 1101.406      | 3.671  |       |               |        |
| 24    | 1096.294      | 3.653  |       |               |        |
| 25    | 962.069       | 3.206  |       |               |        |
| 26    | 954.766       | 3.182  |       |               |        |
| 27    | 948.486       | 3.161  |       |               |        |
| 28    | 892.277       | 2.977  |       |               |        |
| 29    | 889.041       | 2.963  |       |               |        |
| 30    | 880.424       | 2.934  |       |               |        |
| 31    | 875.312       | 2.917  |       |               |        |
| 32    | 853.696       | 2.845  |       |               |        |
| 33    | 846.101       | 2.820  |       |               |        |
| 34    | 751.311       | 2.504  |       |               |        |
| 35    | 418.596       | 1.395  |       |               |        |
| 36    | 417.281       | 1.391  |       |               |        |

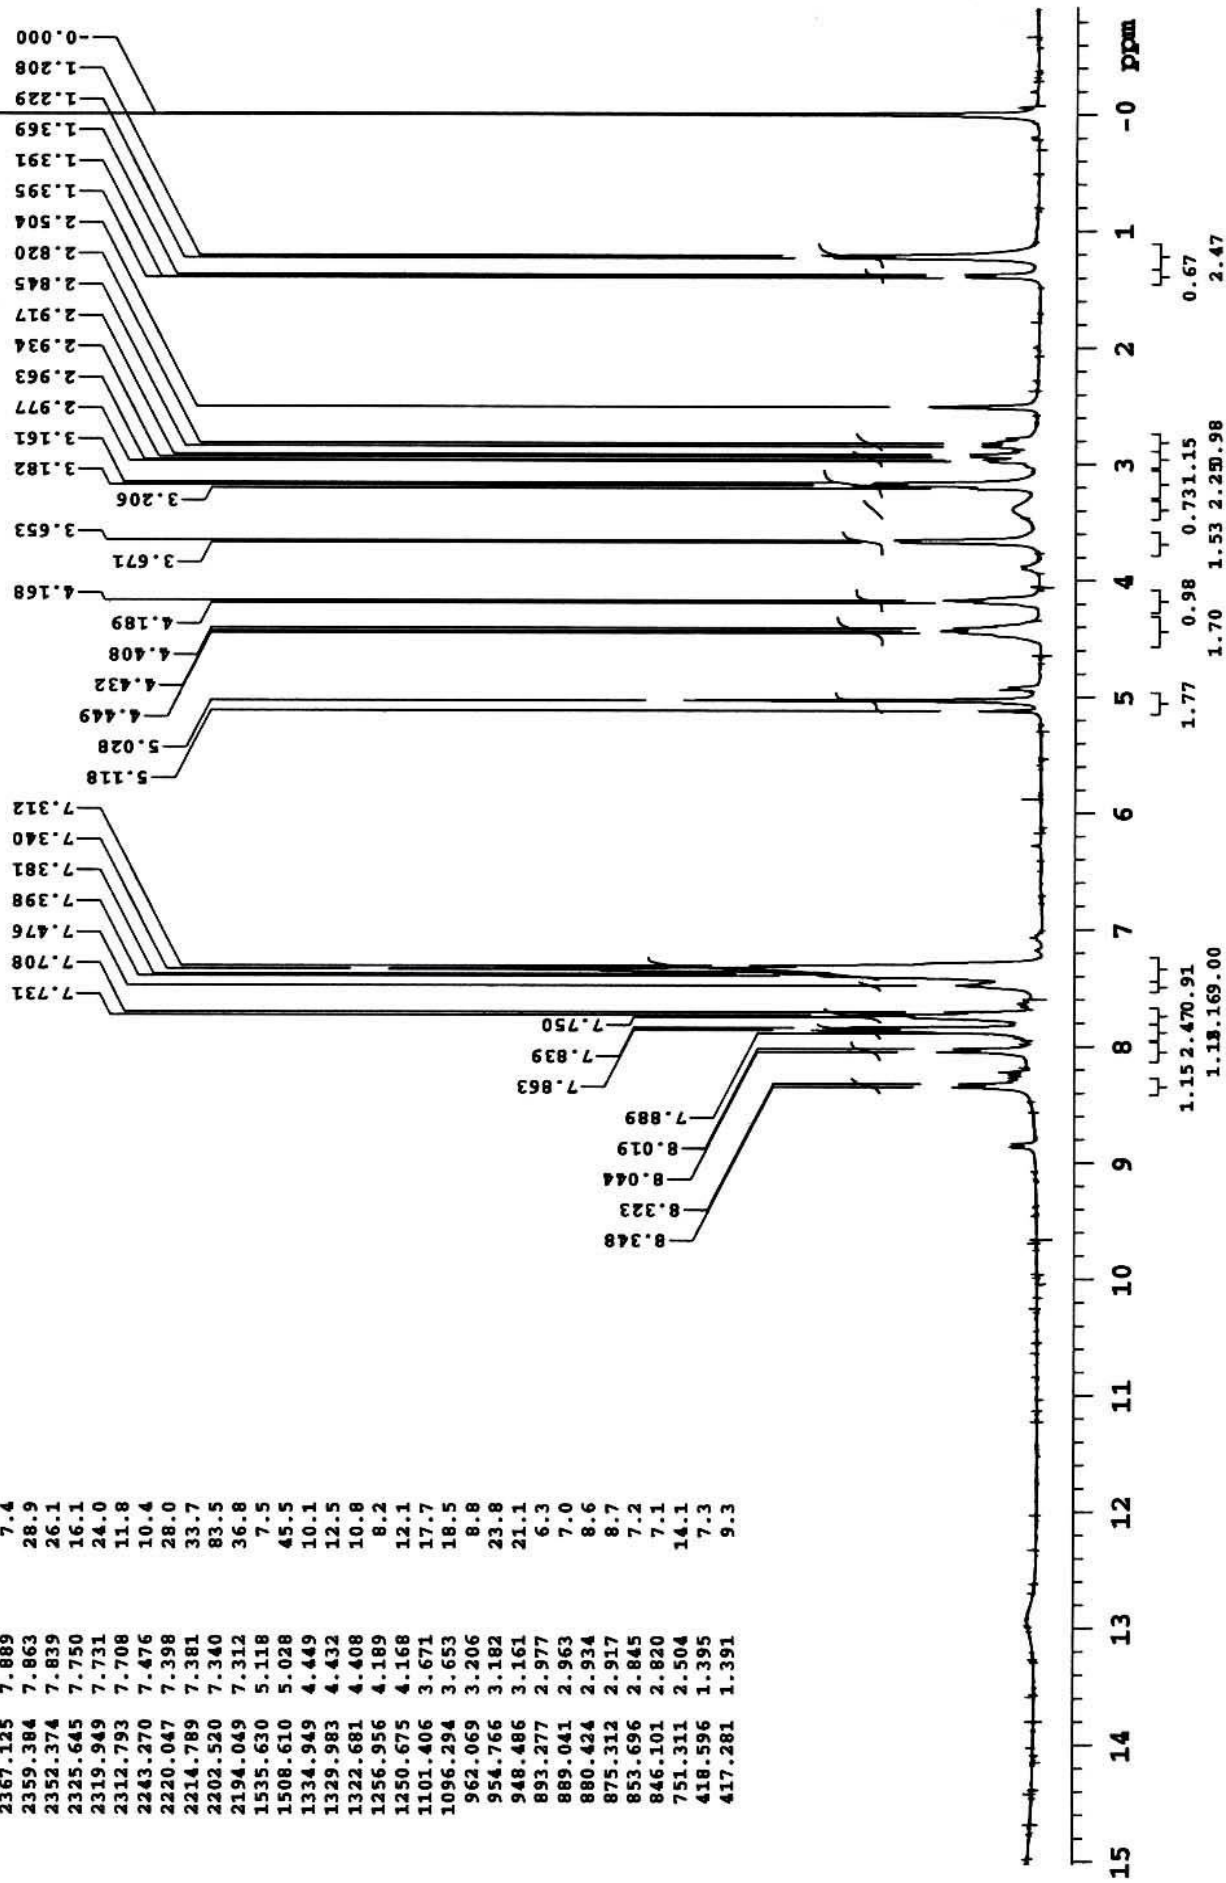

| INDEX | FREQUENCY PPM | HEIGHT |
|-------|---------------|--------|
| 1     | 12991.411     | 4.3    |
| 2     | 12962.282     | 4.3    |
| 3     | 12714.421     | 4.3    |
| 4     | 11801.892     | 3.7    |
| 5     | 10997.404     | 9.7    |
| 6     | 10597.543     | 10.8   |
| 7     | 10334.853     | 5.0    |
| 8     | 9678.658      | 13.7   |
| 9     | 9628.344      | 12.8   |
| 10    | 9608.219      | 15.8   |
| 11    | 9576.442      | 17.4   |
| 12    | 9424.442      | 15.1   |
| 13    | 9043.647      | 14.9   |
| 14    | 4936.999      | 6.0    |
| 15    | 3948.734      | 4.4    |
| 16    | 3608.720      | 4.6    |
| 17    | 3497.500      | 7.1    |
| 18    | 3277.180      | 3.4    |
| 19    | 3043.619      | 16.3   |
| 20    | 3022.964      | 46.2   |
| 21    | 3001.779      | 87.3   |
| 22    | 2981.124      | 103.1  |
| 23    | 2959.939      | 88.7   |
| 24    | 2939.284      | 47.4   |
| 25    | 2918.629      | 17.6   |
| 26    | 2690.894      | 5.7    |
| 27    | 2544.190      | 5.5    |
| 28    | 1403.396      | 5.2    |

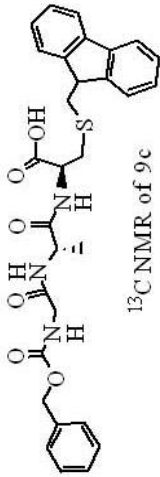

<sup>13</sup>C NMR of 9c

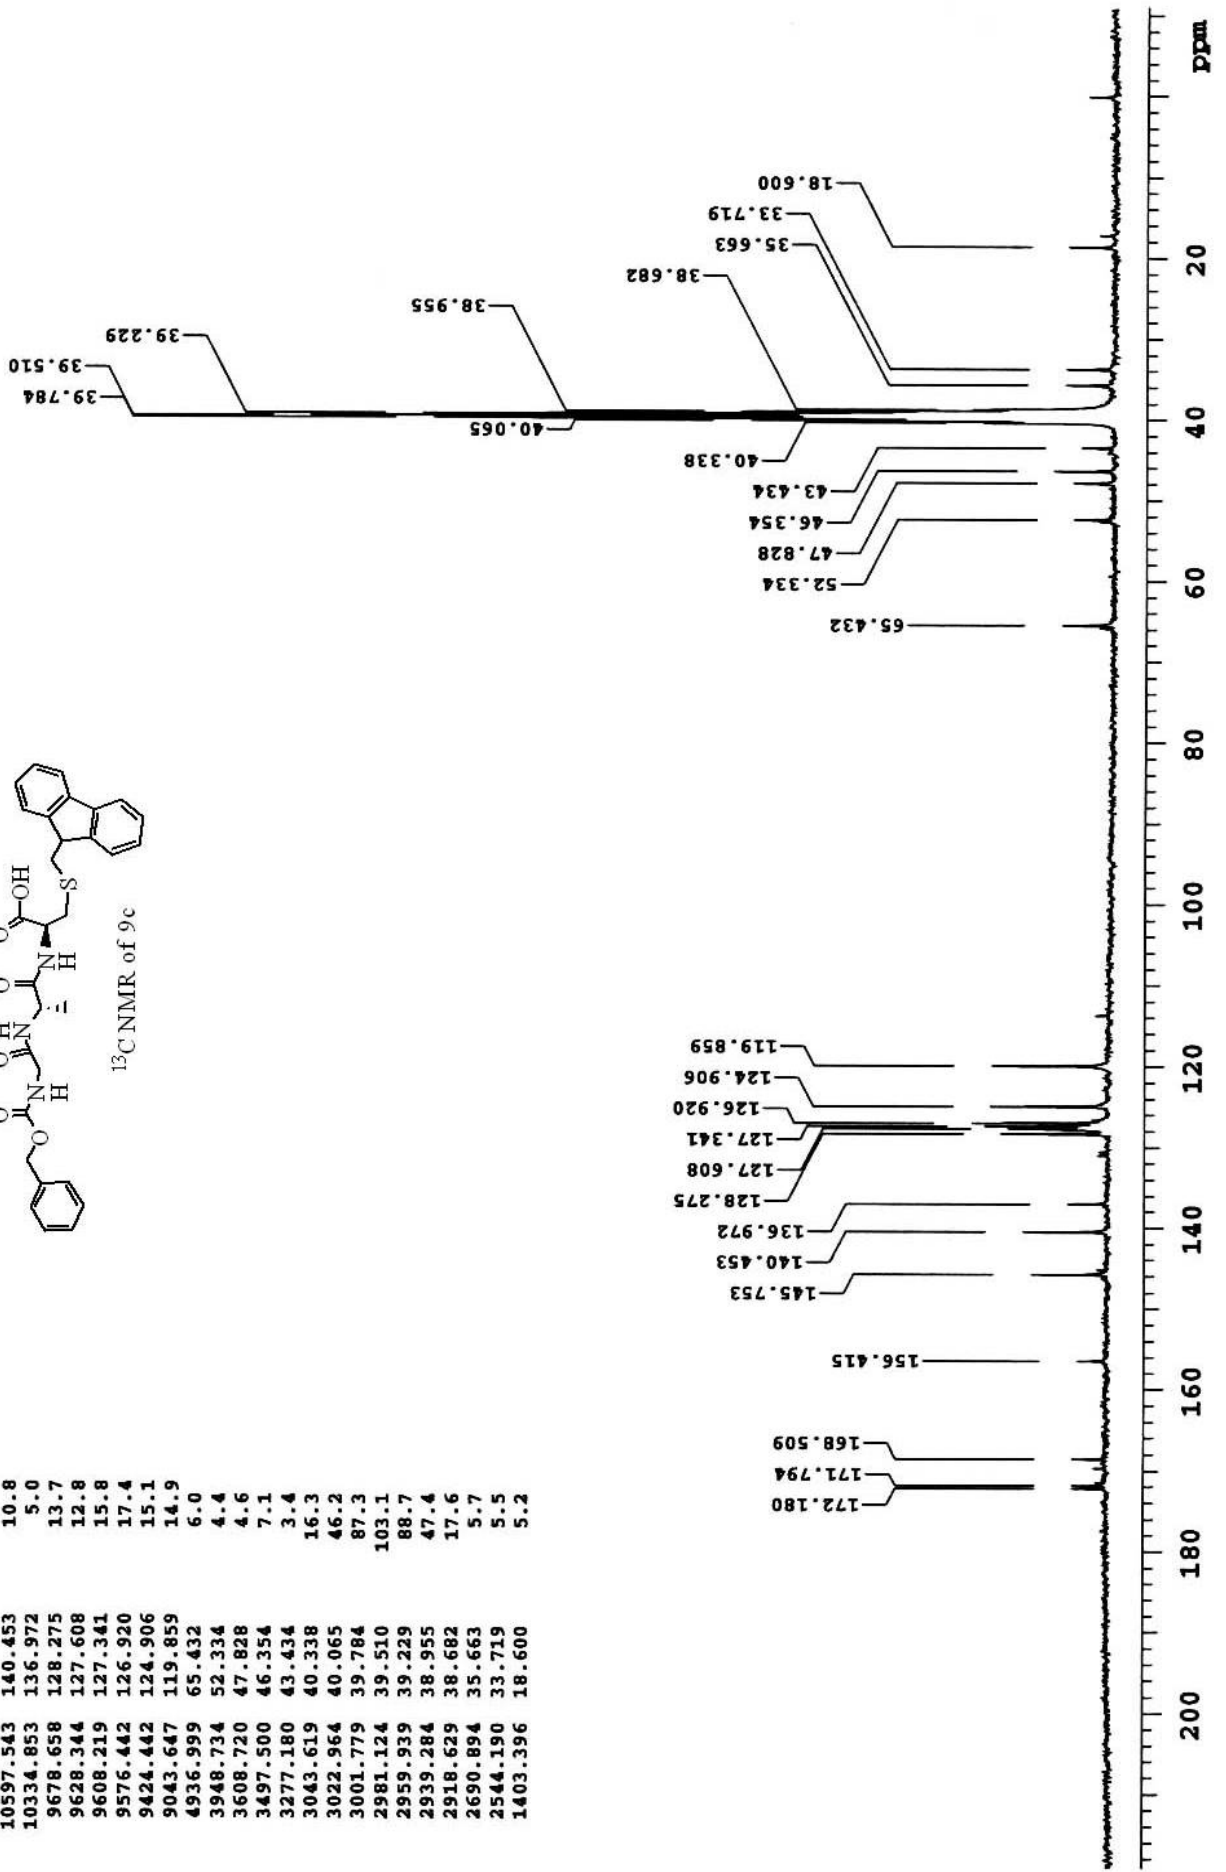







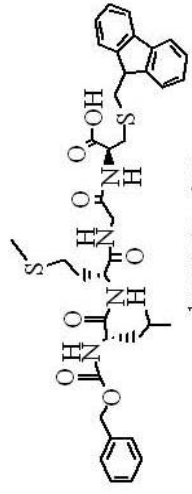

<sup>1</sup>H NMR of 10a

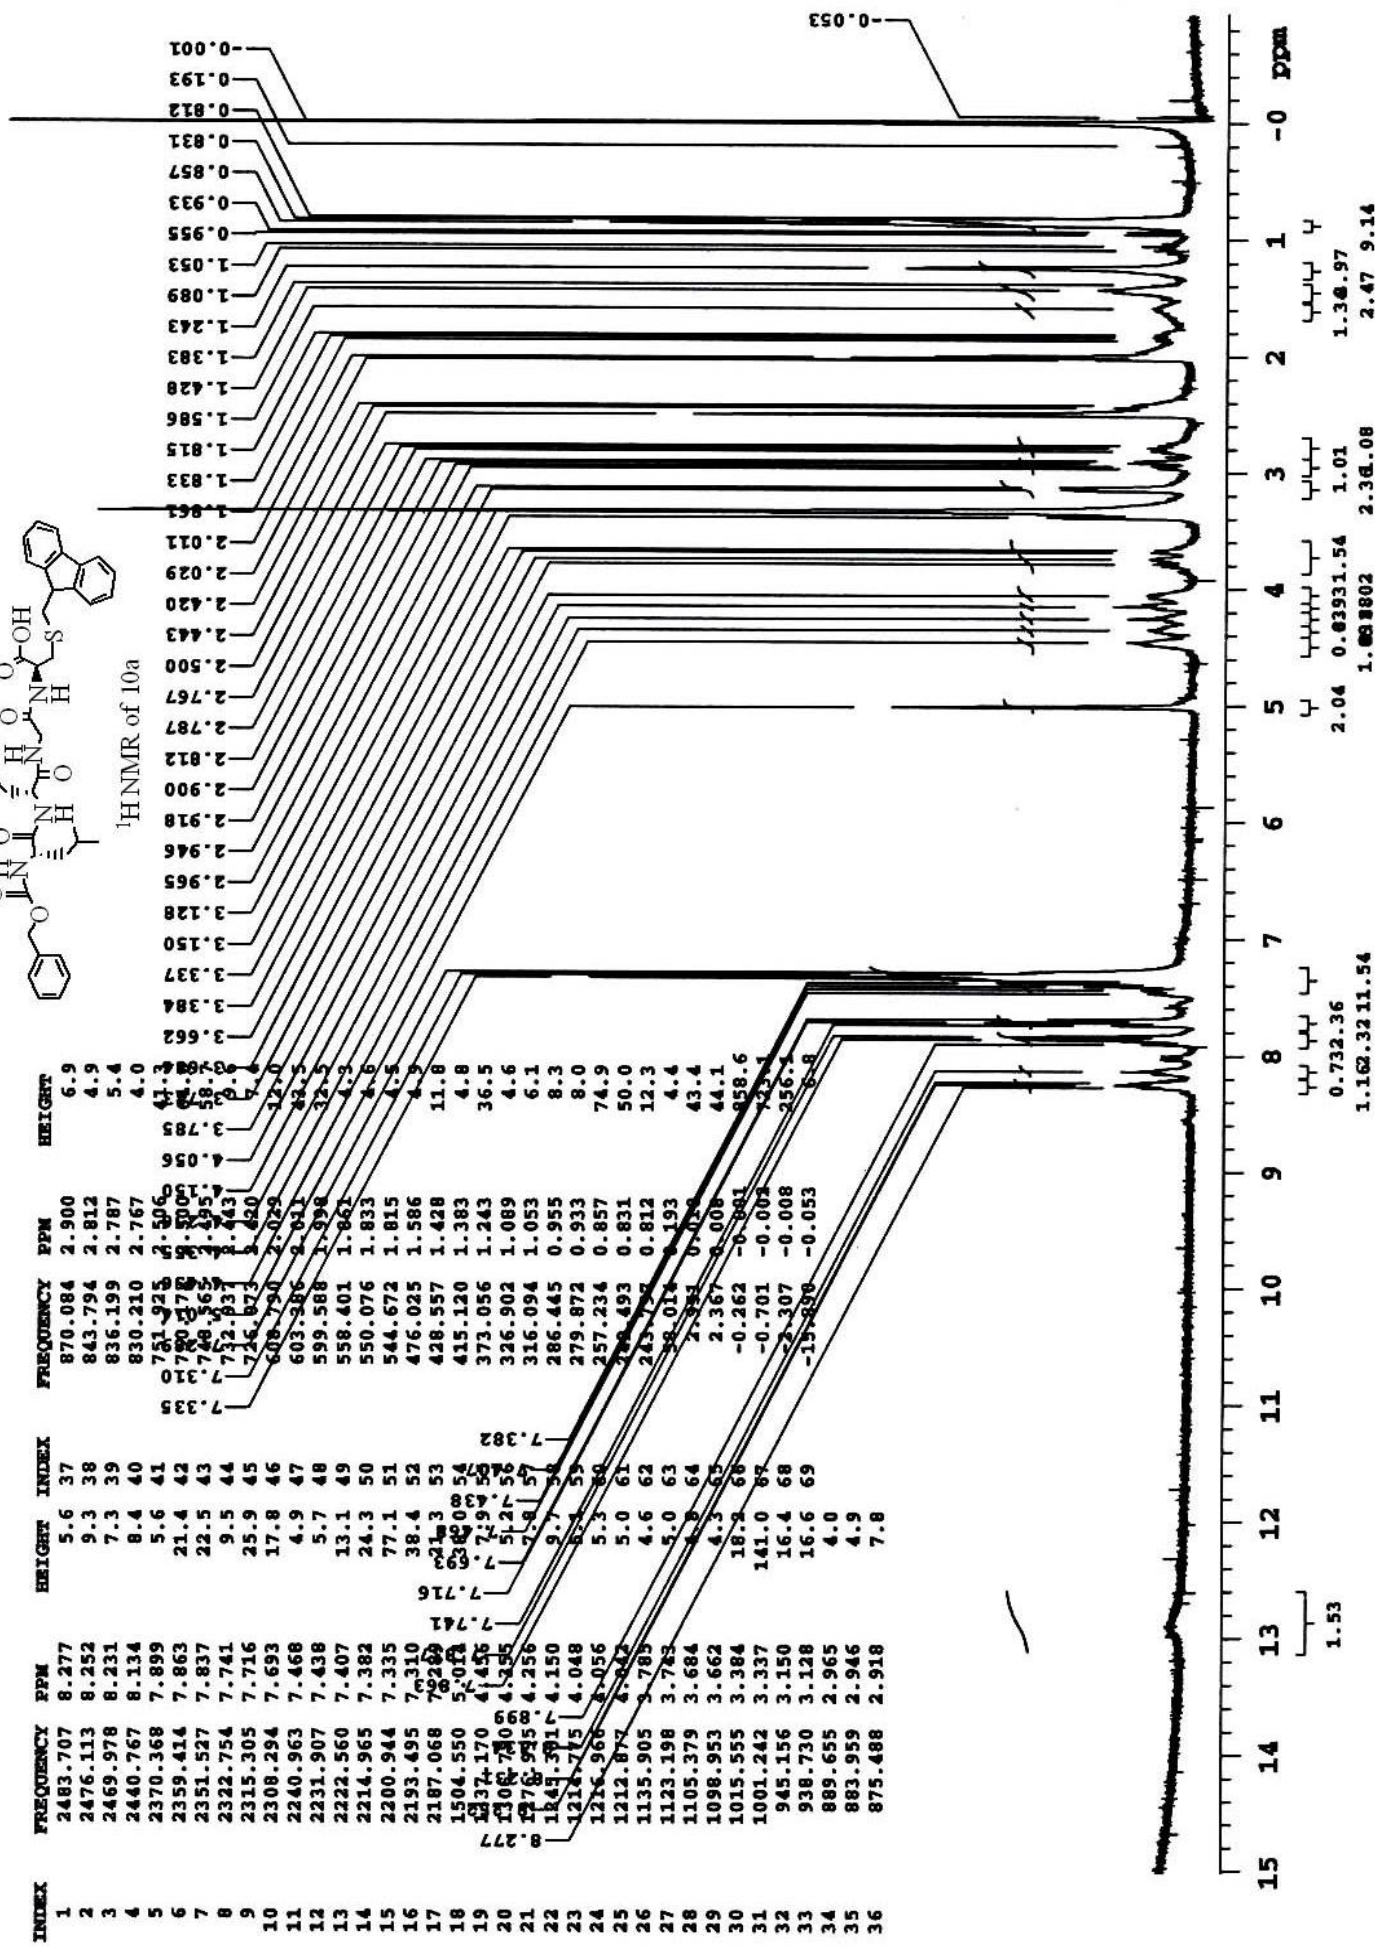



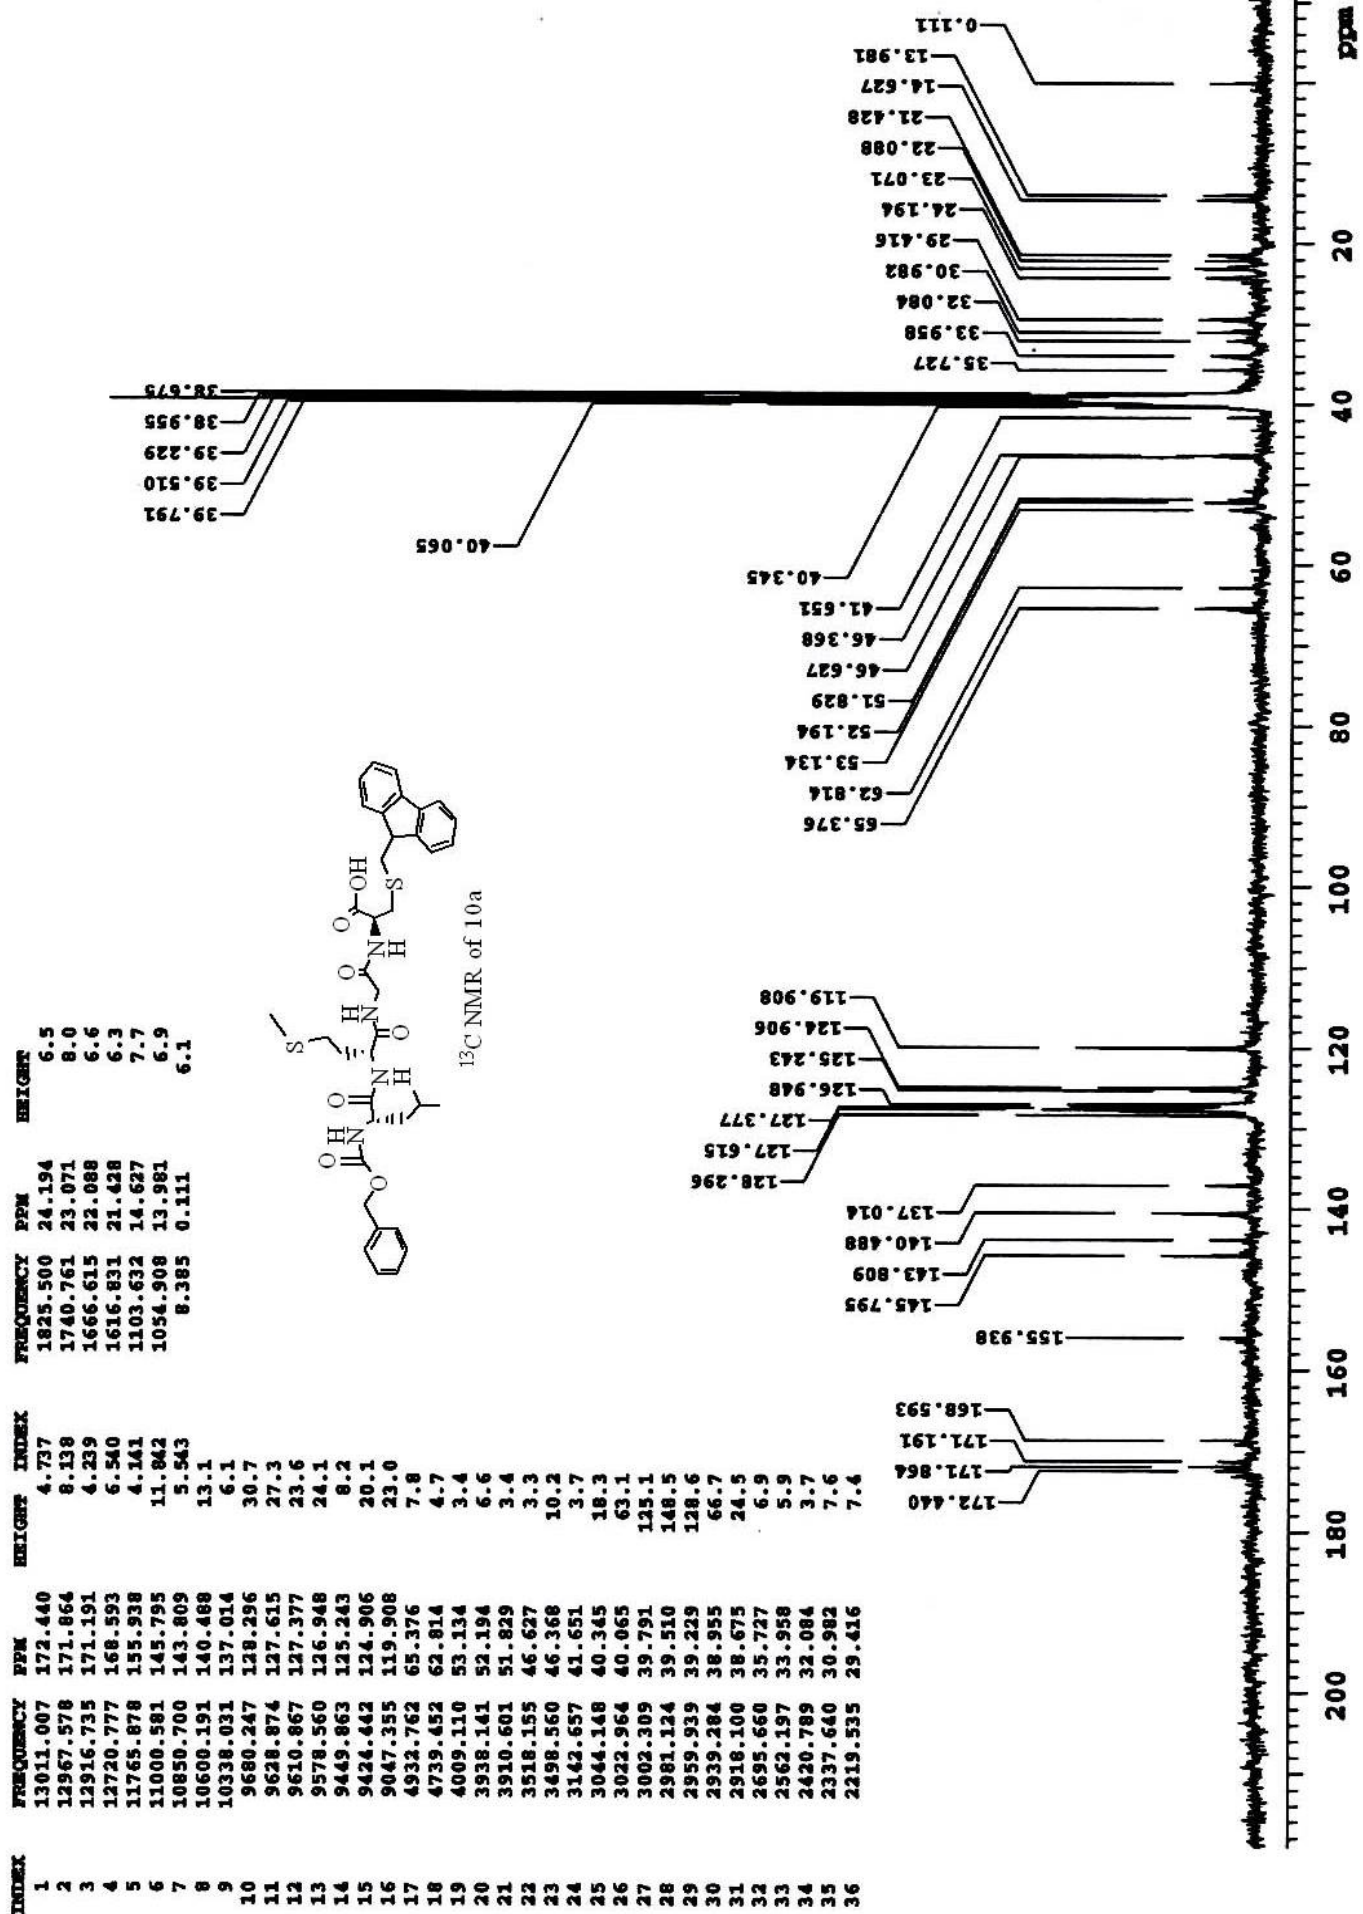

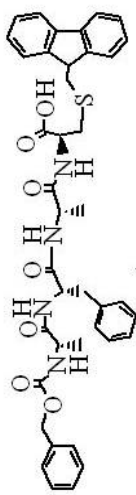

<sup>1</sup>H NMR of 10b

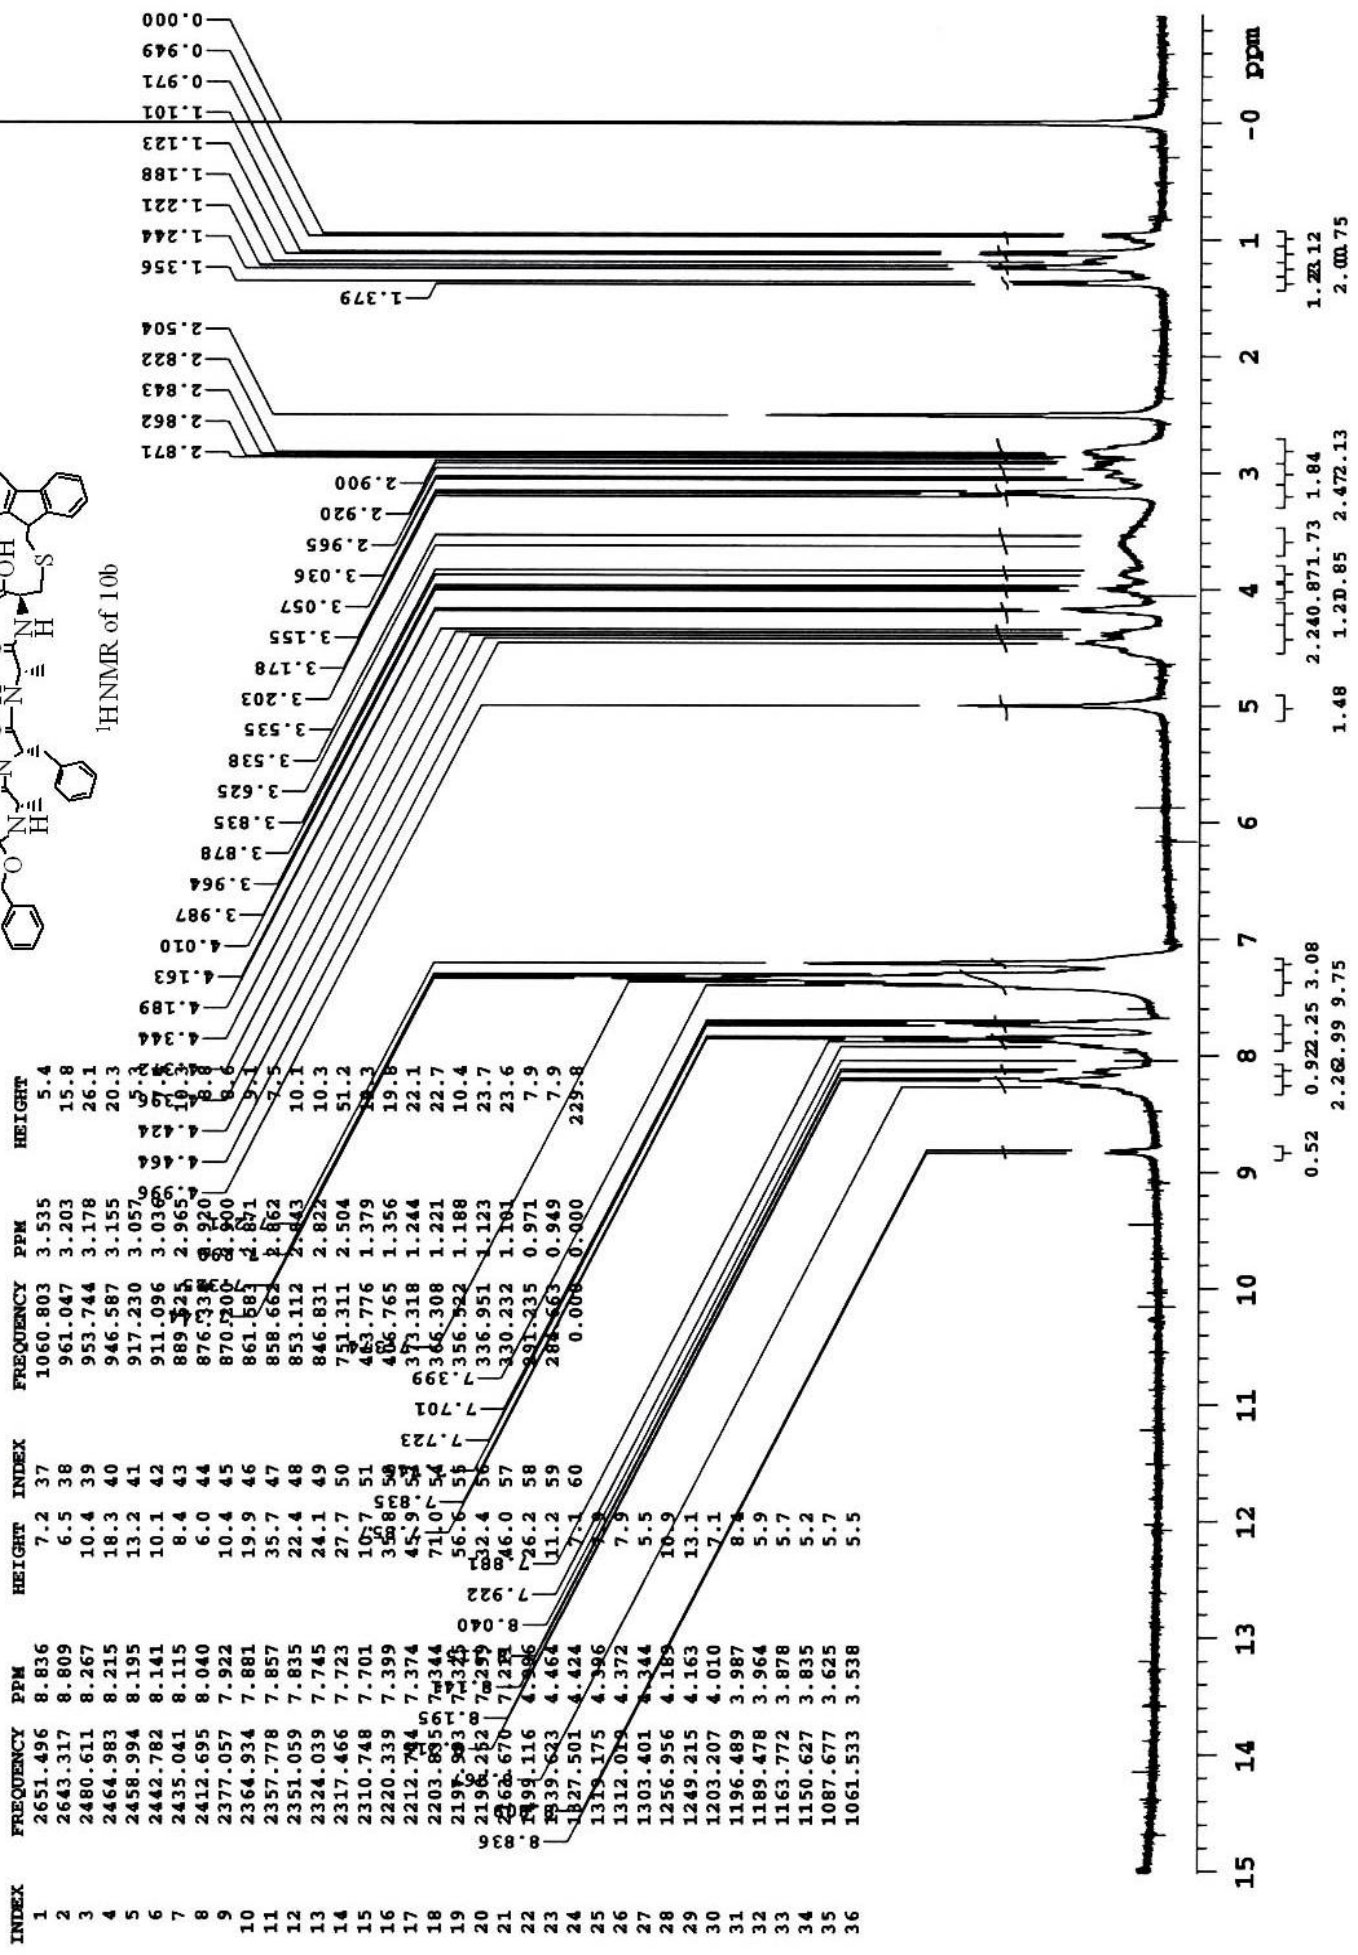

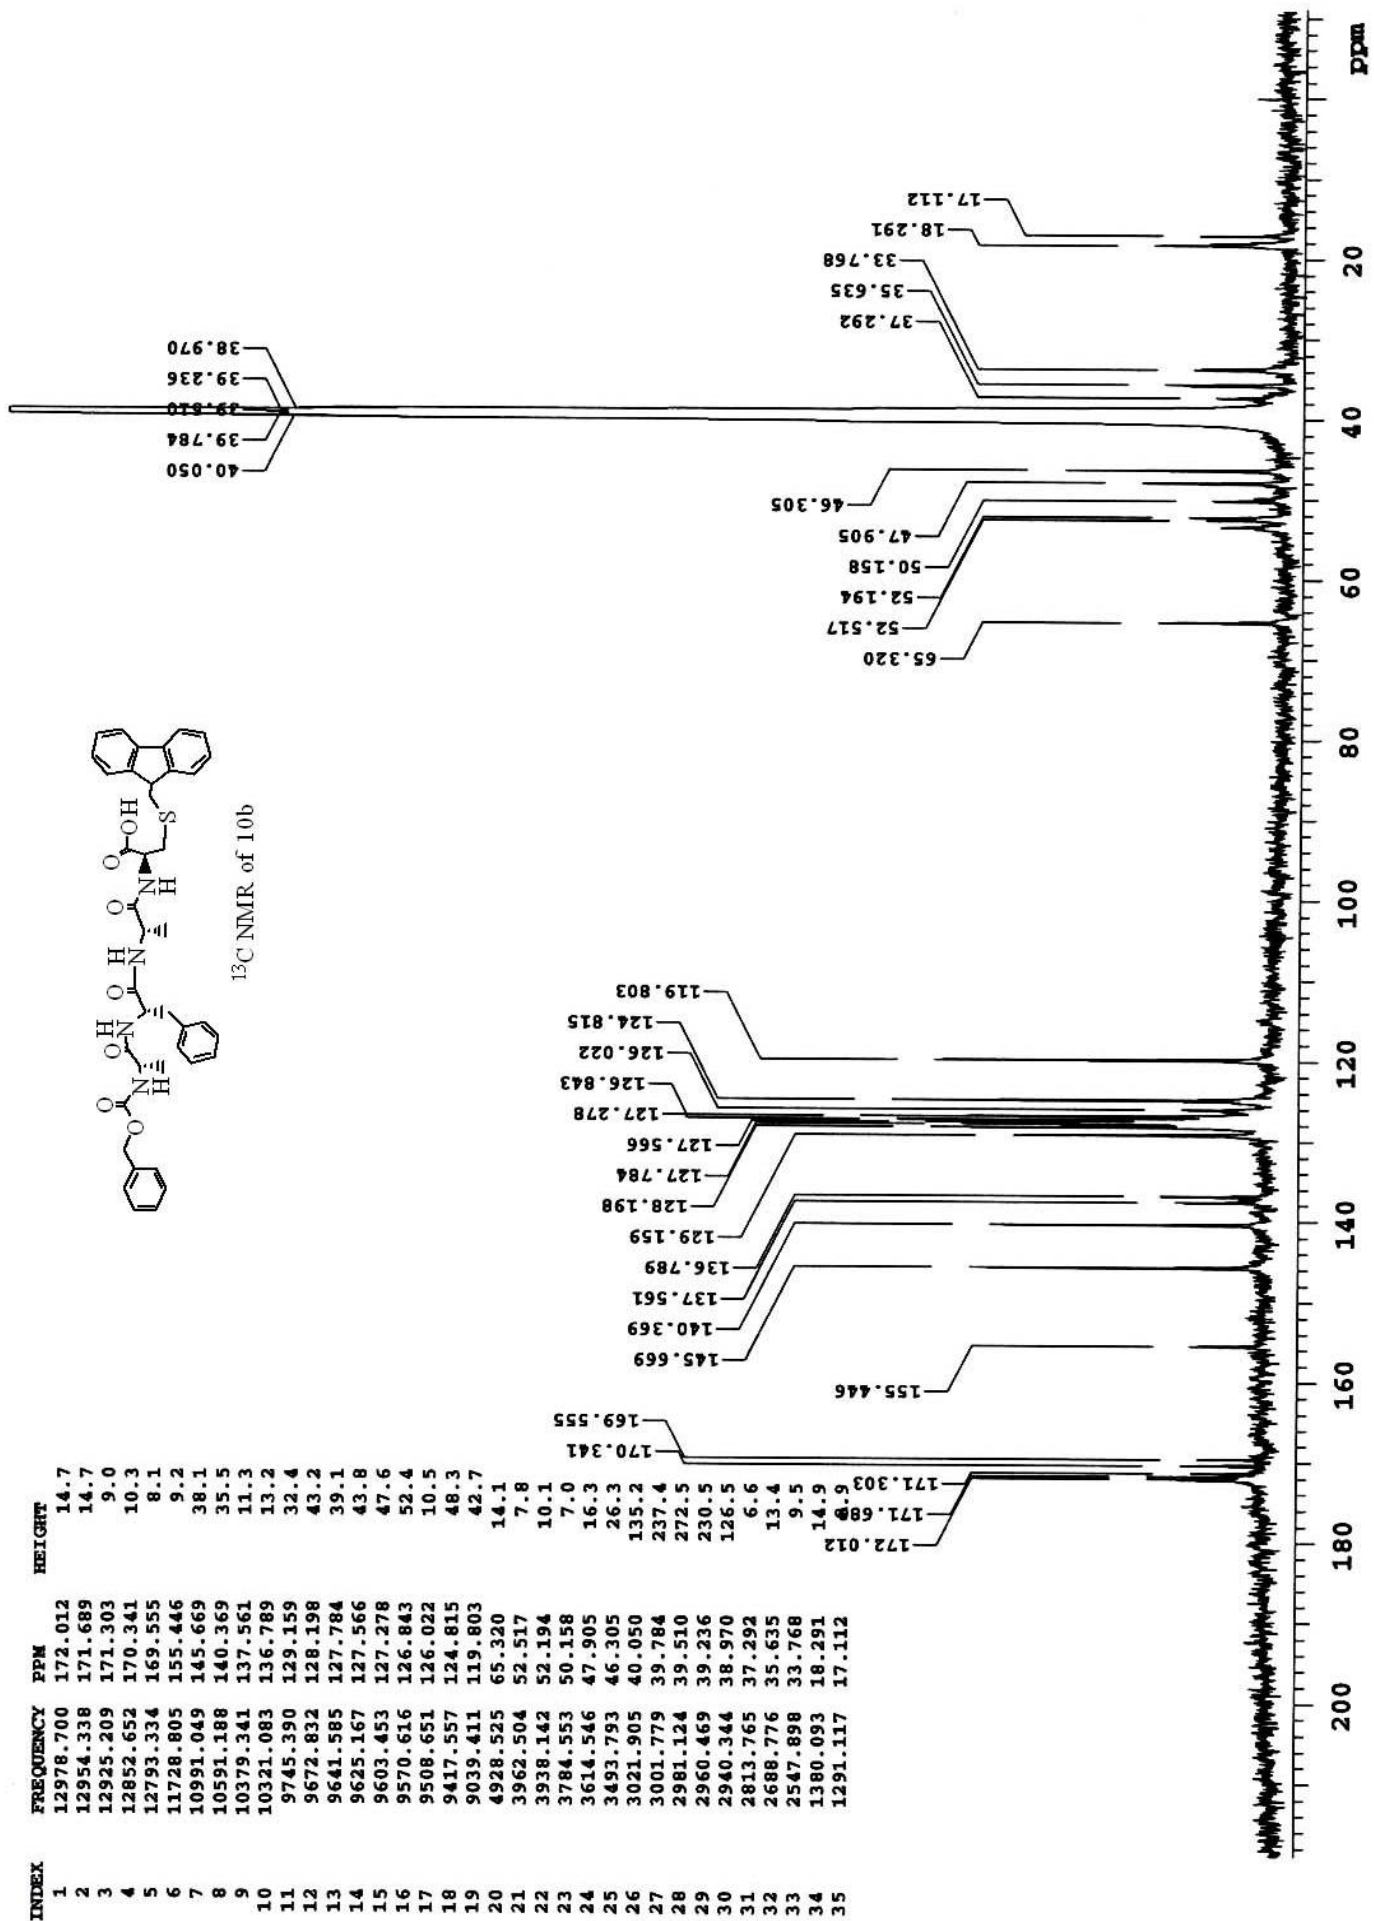



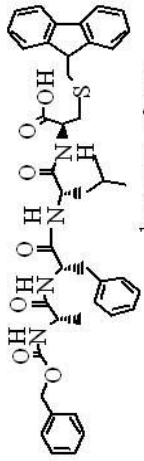

<sup>1</sup>H NMR of 10c

| INDEX | FREQUENCY PPM | HEIGHT | INDEX | FREQUENCY PPM | HEIGHT |
|-------|---------------|--------|-------|---------------|--------|
| 1     | 2657.806      | 8.857  | 8     | 2297.340      | 7.656  |
| 2     | 2479.910      | 8.264  | 9     | 2233.368      | 7.443  |
| 3     | 2472.315      | 8.239  | 10    | 2202.112      | 7.339  |
| 4     | 2463.552      | 8.210  | 11    | 2164.137      | 7.212  |
| 5     | 2455.519      | 8.183  | 12    | 2113.018      | 7.042  |
| 6     | 2376.210      | 7.919  | 13    | 2106.738      | 7.021  |
| 7     | 2353.864      | 7.844  | 14    | 1988.140      | 6.626  |
| 8     | 2303.767      | 7.677  | 15    | 1974.119      | 6.579  |
| 9     | 2297.340      | 7.656  | 16    | 1751.530      | 5.837  |
| 10    | 2233.368      | 7.443  | 17    | 1497.539      | 4.991  |
| 11    | 2202.112      | 7.339  | 18    | 1321.396      | 4.404  |
| 12    | 2164.137      | 7.212  | 19    | 1246.323      | 4.153  |
| 13    | 2113.018      | 7.042  | 20    | 1223.100      | 4.076  |
| 14    | 2106.738      | 7.021  | 21    | 1216.382      | 4.054  |
| 15    | 1988.140      | 6.626  | 22    | 1178.553      | 3.928  |
| 16    | 1974.119      | 6.579  | 23    | 1090.628      | 3.635  |
| 17    | 1751.530      | 5.837  | 24    | 1028.846      | 3.429  |
| 18    | 1497.539      | 4.991  | 25    | 989.265       | 3.297  |
| 19    | 1321.396      | 4.404  | 26    | 947.493       | 3.158  |
| 20    | 1246.323      | 4.153  | 27    | 905.429       | 3.017  |
| 21    | 1223.100      | 4.076  | 28    | 874.465       | 2.914  |
| 22    | 1216.382      | 4.054  | 29    | 818.672       | 2.728  |
| 23    | 1178.553      | 3.928  | 30    | 793.843       | 2.646  |
| 24    | 1090.628      | 3.635  | 31    | 750.172       | 2.500  |
| 25    | 1028.846      | 3.429  | 32    | 441.410       | 1.471  |
| 26    | 989.265       | 3.297  | 33    | 364.731       | 1.215  |
| 27    | 947.493       | 3.158  | 34    | 357.866       | 1.193  |
| 28    | 905.429       | 3.017  | 35    | 344.575       | 1.148  |
| 29    | 874.465       | 2.914  |       |               |        |
| 30    | 818.672       | 2.728  |       |               |        |
| 31    | 793.843       | 2.646  |       |               |        |
| 32    | 750.172       | 2.500  |       |               |        |
| 33    | 441.410       | 1.471  |       |               |        |
| 34    | 364.731       | 1.215  |       |               |        |
| 35    | 357.866       | 1.193  |       |               |        |
| 36    | 344.575       | 1.148  |       |               |        |

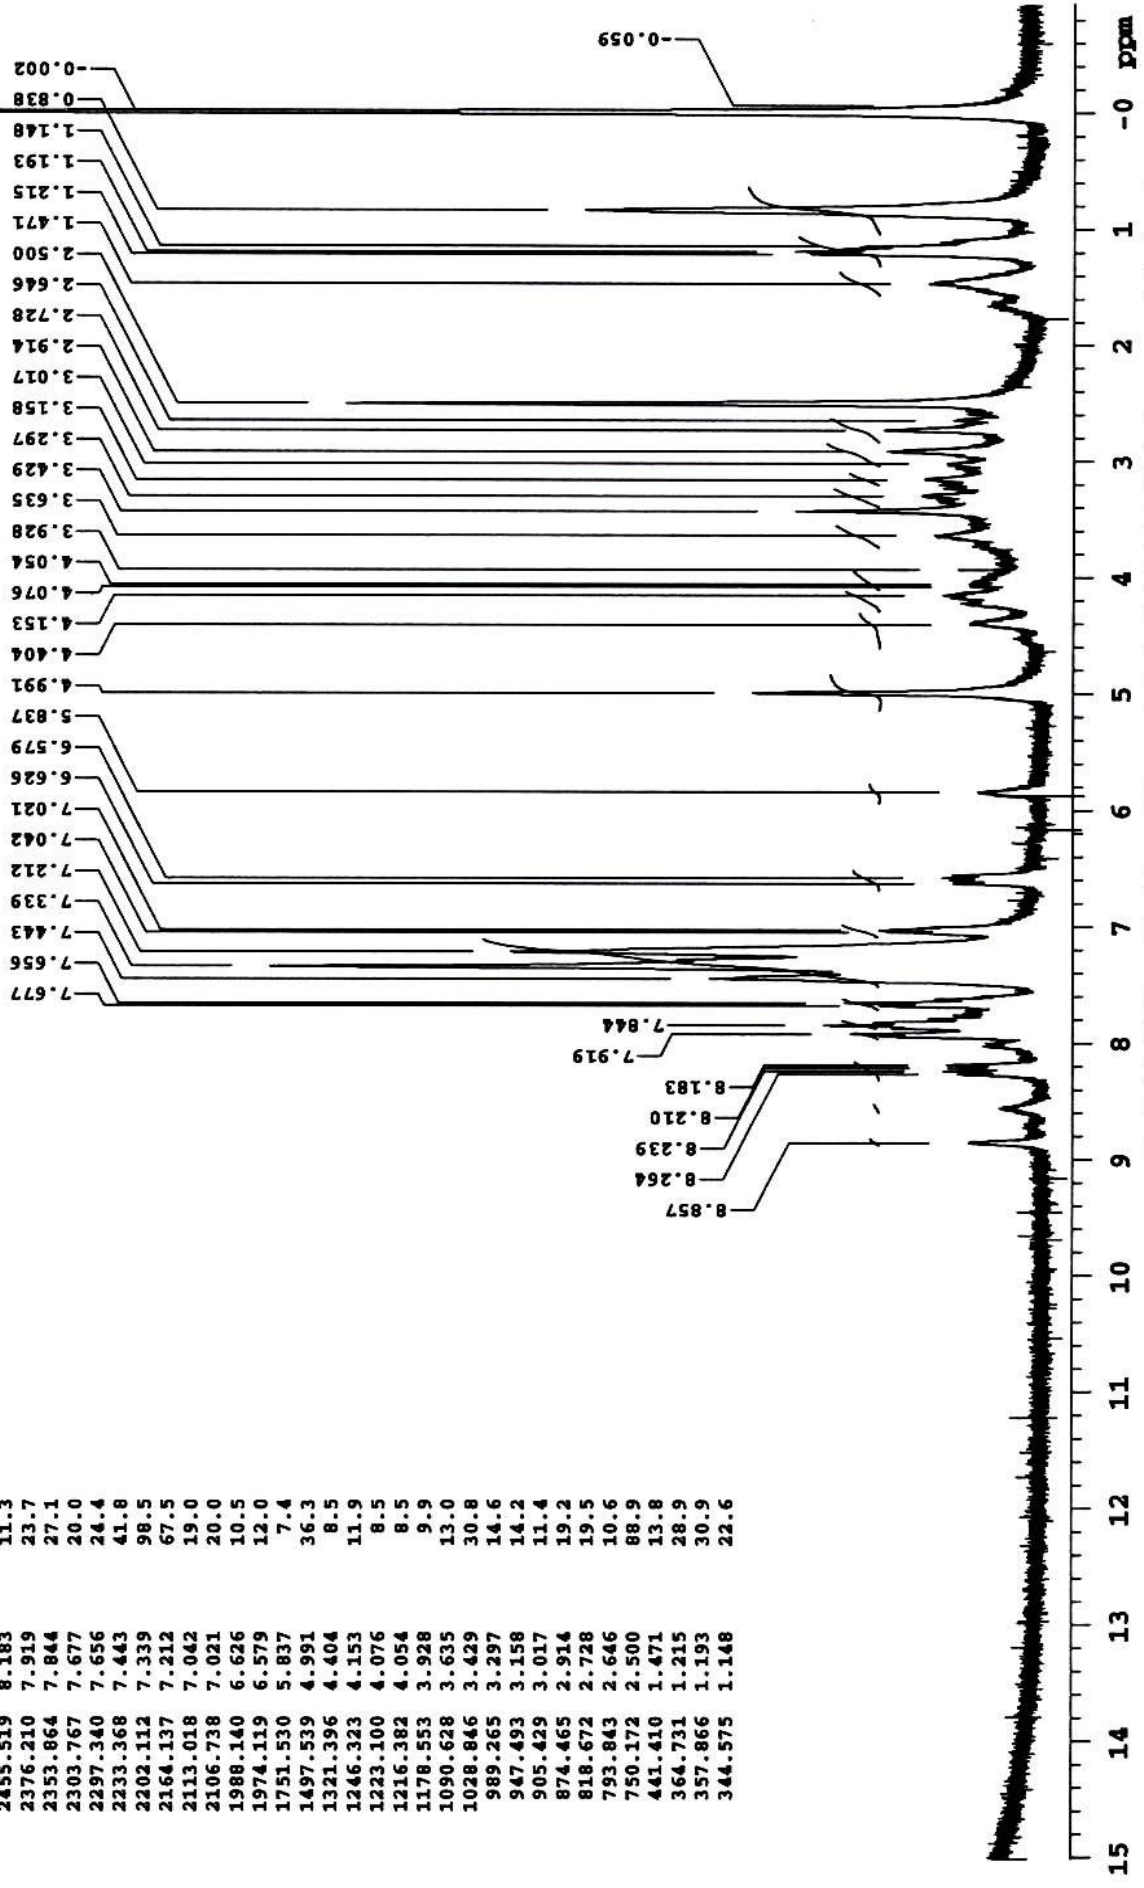

| HEIGHT | INDEX | FREQUENCY PPM | HEIGHT |
|--------|-------|---------------|--------|
| 58.1   | 37    | 251.392       | 0.838  |
| 343.7  | 38    | -0.701        | -0.002 |
| 16.1   | 39    | -17.789       | -0.059 |
| 0.35   | 35    | 357.866       | 1.193  |
| 0.98   | 34    | 364.731       | 1.215  |
| 1.06   | 33    | 441.410       | 1.471  |
| 0.37   | 32    | 750.172       | 2.500  |
| 2.00   | 31    | 818.672       | 2.728  |
| 0.84   | 30    | 874.465       | 2.914  |
| 1.81   | 29    | 905.429       | 3.017  |
| 1.99   | 28    | 947.493       | 3.158  |
| 1.99   | 27    | 989.265       | 3.297  |
| 1.81   | 26    | 1028.846      | 3.429  |
| 1.31   | 25    | 1090.628      | 3.635  |
| 1.81   | 24    | 1178.553      | 3.928  |
| 1.81   | 23    | 1216.382      | 4.054  |
| 1.81   | 22    | 1223.100      | 4.076  |
| 1.81   | 21    | 1246.323      | 4.153  |
| 1.81   | 20    | 1321.396      | 4.404  |
| 1.81   | 19    | 1497.539      | 4.991  |
| 1.81   | 18    | 1751.530      | 5.837  |
| 1.81   | 17    | 1974.119      | 6.579  |
| 1.81   | 16    | 1988.140      | 6.626  |
| 1.81   | 15    | 2106.738      | 7.021  |
| 1.81   | 14    | 2113.018      | 7.042  |
| 1.81   | 13    | 2164.137      | 7.212  |
| 1.81   | 12    | 2202.112      | 7.339  |
| 1.81   | 11    | 2233.368      | 7.443  |
| 1.81   | 10    | 2297.340      | 7.656  |
| 1.81   | 9     | 2455.519      | 8.183  |
| 1.81   | 8     | 2472.315      | 8.239  |
| 1.81   | 7     | 2479.910      | 8.264  |
| 1.81   | 6     | 2657.806      | 8.857  |

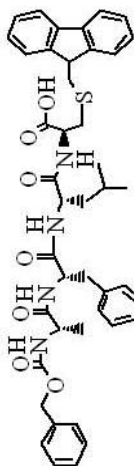

<sup>13</sup>C NMR of 10c

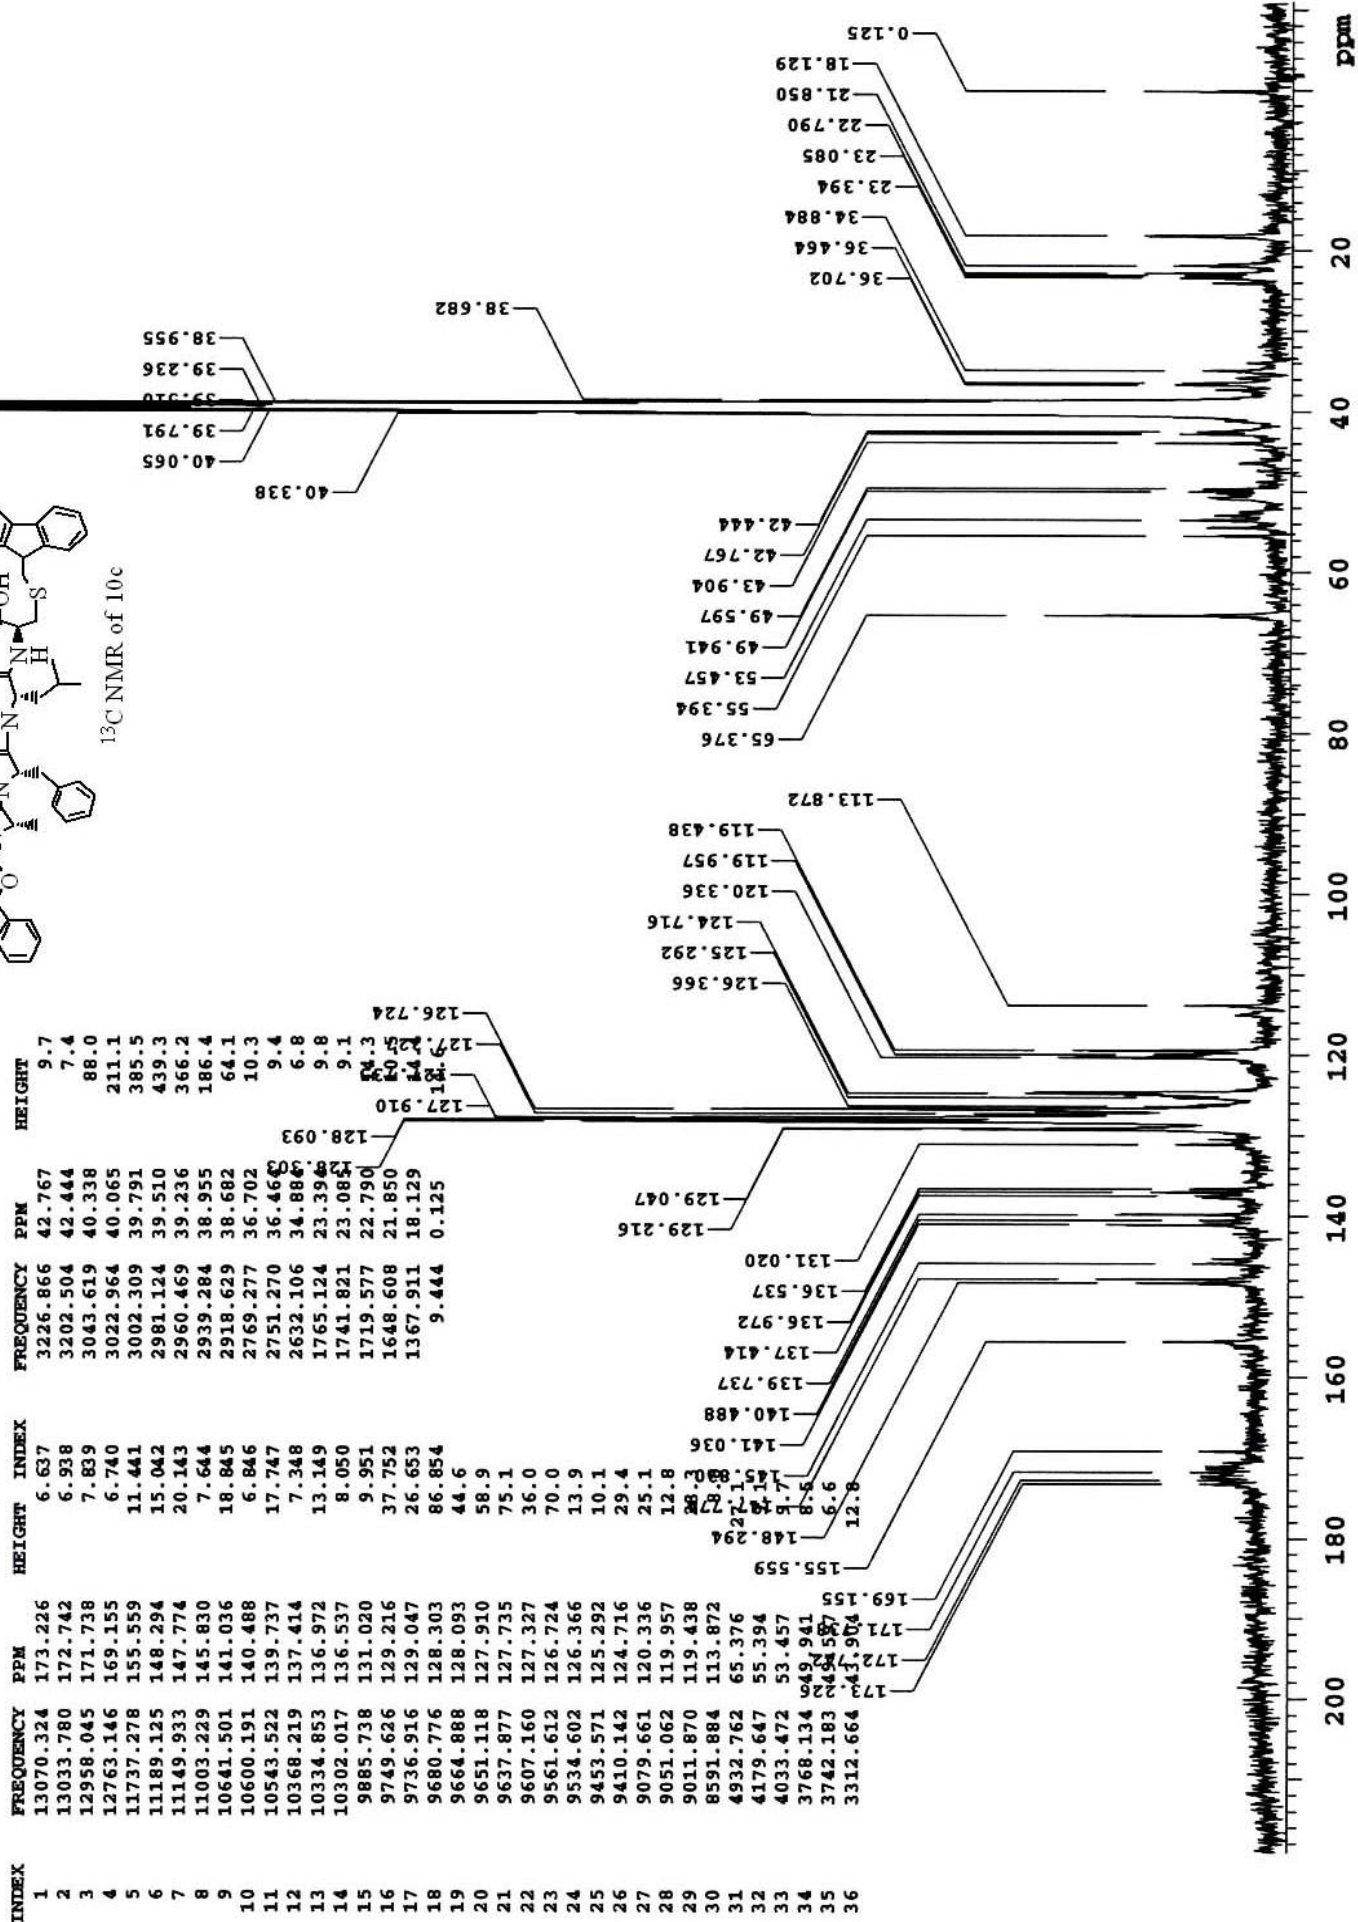

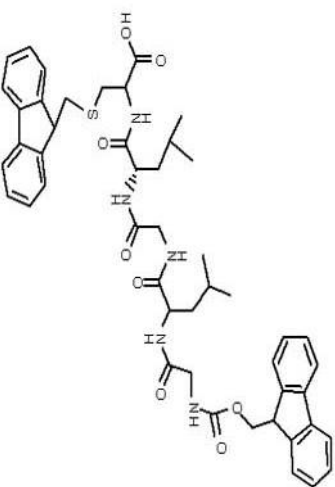

<sup>1</sup>H NMR of 11

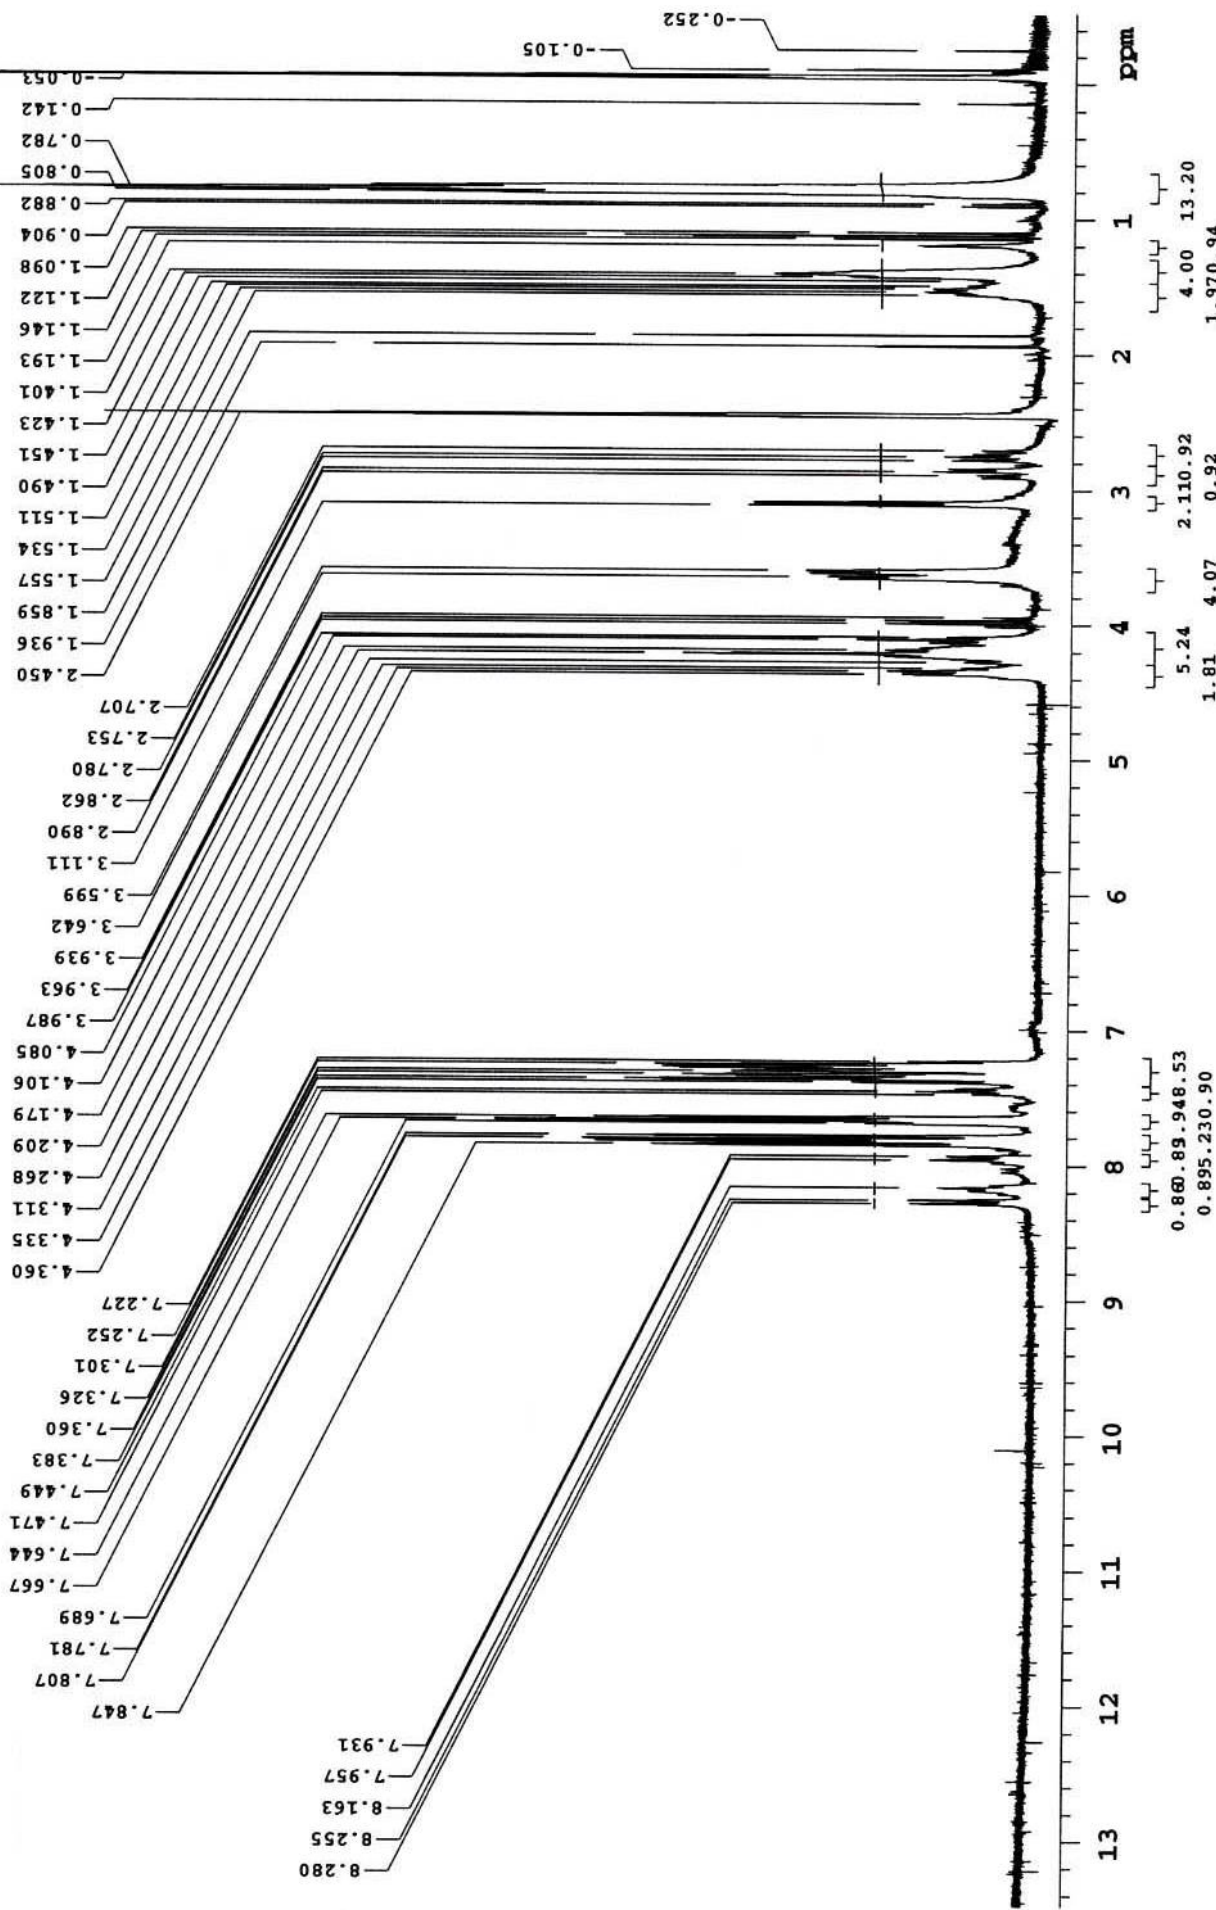



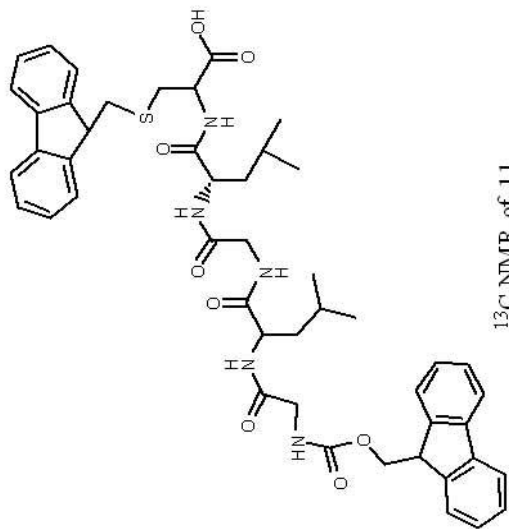

<sup>13</sup>C NMR of 11

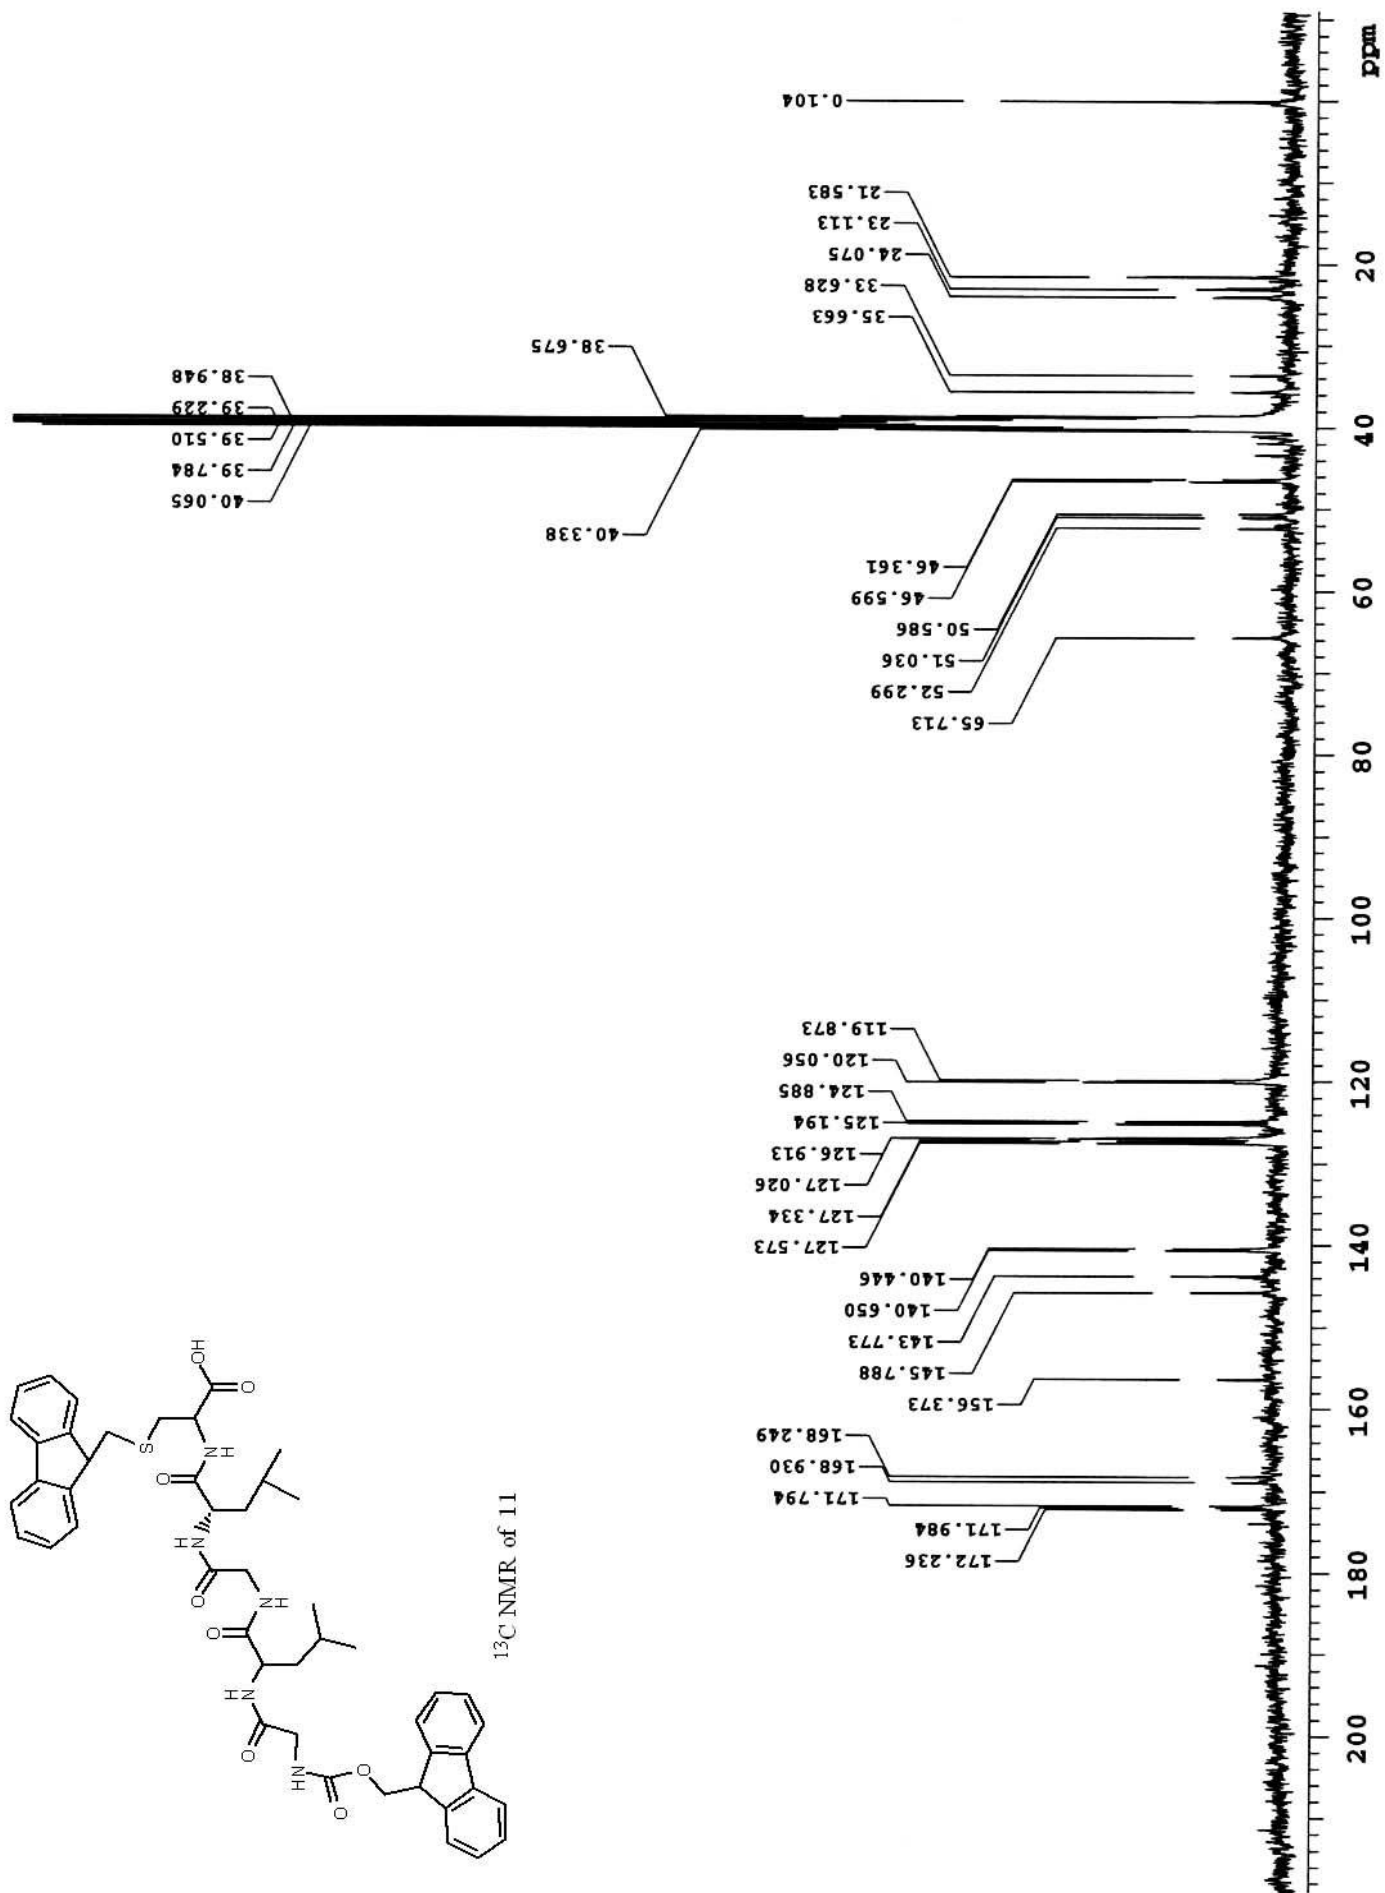

Supplement: c0ob00663g.pdf [file c0ob00663g.pdf]
